# Supplementary material for: Molecular design of efficient yellow- to red-emissive alkynylgold(iii) complexes for the realization of thermally activated delayed fluorescence (TADF) and their applications in solution-processed organic light-emitting devices
Source: Royal Society of Chemistry journal article supplement (doi:10.1039/d1sc02256c), 2021-01-01
Supplement: d1sc02256c1.pdf [file d1sc02256c1.pdf]

## Supporting Information

### **Molecular Design of Efficient Yellow- to Red-Emissive Alkynylgold(III) Complexes for the Realization of Thermally Activated Delayed Fluorescence (TADF) and Their Applications in Solution-Processed Organic Light-Emitting Devices**

*Cathay Chai Au-Yeung, Lok-Kwan Li, Man-Chung Tang, Shiu-Lun Lai, Wai-Lung Cheung, Maggie Ng, Mei-Yee Chan, \* Vivian Wing-Wah Yam\**

[\*] Ms. C. C. Au-Yeung, Dr. L.-K. Li, Dr. M.-C. Tang, Dr. S.-L. Lai, Mr. W.-L. Cheung, Dr. M. Ng, Dr. M.-Y. Chan,\* Prof. V. W.-W. Yam\*

Institute of Molecular Functional Materials and Department of Chemistry, The University of Hong Kong, Pokfulam Road, Hong Kong, P. R. China

Fax: +(852) 2857-1586; Tel: +(852) 2859-2153

E-mail: wwyam@hku.hk; chanmym@hku.hk

## Table of Contents

|                                                                                                                                                                                              | <b>Page</b> |
|----------------------------------------------------------------------------------------------------------------------------------------------------------------------------------------------|-------------|
| <b>Scheme S1.</b> Synthetic routes for the gold(III) complexes.                                                                                                                              | 5           |
| <b>Figure S1.</b> Thermogravimetric analysis (TGA) traces of <b>1</b> , <b>3–6</b> .                                                                                                         | 6           |
| <b>Table S1.</b> Thermal properties of <b>1</b> , <b>3–6</b> .                                                                                                                               | 6           |
| <b>Figure S2.</b> Cyclic voltammograms of <b>1–6</b> in dichloromethane (0.1 M <sup>n</sup> Bu <sub>4</sub> NPF <sub>6</sub> ).                                                              | 7           |
| <b>Table S2.</b> Electrochemical data of <b>1–6</b> .                                                                                                                                        | 8           |
| <b>Figure S3.</b> UV–Visible absorption spectra of <b>1–6</b> in toluene at 298 K.                                                                                                           | 9           |
| <b>Figure S4.</b> Time-resolved photoluminescence decay profiles of <b>1</b> , <b>3</b> and <b>6</b> in toluene at 298 K                                                                     | 9           |
| <b>Figure S5.</b> Normalized solvent-dependent emission spectra of <b>3</b> at 298 K.                                                                                                        | 10          |
| <b>Figure S6.</b> Lippert-Mataga plot of <b>3</b> at 298 K in various solvents.                                                                                                              | 10          |
| <b>Figure S7.</b> Transient absorption spectra of <b>1</b> and <b>3</b> in degassed toluene at 298 K                                                                                         | 11          |
| <b>Figure S8.</b> Normalized emission spectra of doped mCP thin films of <b>1–6</b> at different concentrations.                                                                             | 12          |
| <b>Figure S9.</b> Time-resolved photoluminescence decay profiles of <b>1–6</b> in 10 wt % doped mCP thin film at 298 K.                                                                      | 13          |
| <b>Figure S10.</b> Emission spectra of <b>3</b> in toluene at various temperature.                                                                                                           | 14          |
| <b>Figure S11.</b> Emission spectra of <b>4–6</b> in 5 wt % doped mCP thin film at 77, 200 and 320 K.                                                                                        | 15          |
| <b>Figure S12.</b> Time-resolved emission spectra of <b>3</b> and <b>5</b> in 5 wt % doped mCP thin film at 77 and 200 K.                                                                    | 16          |
| <b>Figure S13.</b> Time-resolved photoluminescence decay profiles of <b>1</b> , <b>3</b> , <b>4</b> , <b>5</b> and <b>6</b> in 5 wt % doped mCP thin film at 77, 200 and 320 K respectively. | 17          |
| <b>Table S3.</b> Emission lifetime of <b>1</b> , <b>3</b> , <b>4</b> , <b>5</b> and <b>6</b> in 5 wt % doped mCP thin film at various temperature.                                           | 18          |
| <b>Figure S14.</b> Plot of the emission lifetime of <b>1</b> , <b>3</b> , <b>4</b> , <b>5</b> and <b>6</b> in 5 wt % doped mCP thin film against temperature                                 | 18          |
| <b>Figure S15.</b> Optimized ground-state geometries with selected structural parameters of <b>1</b> , <b>3</b> , <b>5</b> and <b>6</b> at the PBE0 level of theory.                         | 19          |
| <b>Table S4.</b> First twenty-five singlet excited states (S <sub>n</sub> ) of <b>1</b> , <b>3</b> , <b>5</b> and <b>6</b> computed by TDDFT/CPCM using toluene as the solvent.              | 20          |

|                    |                                                                                                                        |    |
|--------------------|------------------------------------------------------------------------------------------------------------------------|----|
| <b>Figure S16.</b> | Simulated UV-vis spectrum of <b>1</b> computed by TDDFT/CPCM using toluene as the solvent.                             | 24 |
| <b>Figure S17.</b> | Simulated UV-vis spectrum of <b>3</b> computed by TDDFT/CPCM using toluene as the solvent.                             | 24 |
| <b>Figure S18.</b> | Simulated UV-vis spectrum of <b>5</b> computed by TDDFT/CPCM using toluene as the solvent.                             | 25 |
| <b>Figure S19.</b> | Simulated UV-vis spectrum of <b>6</b> computed by TDDFT/CPCM using toluene as the solvent.                             | 25 |
| <b>Figure S20.</b> | Spatial plots (isovalue = 0.03) of selected molecular orbitals of <b>1</b> at the optimized ground-state geometry.     | 26 |
| <b>Figure S21.</b> | Spatial plots (isovalue = 0.03) of selected molecular orbitals of <b>5</b> at the optimized ground-state geometry.     | 26 |
| <b>Figure S22.</b> | Spatial plots (isovalue = 0.03) of selected molecular orbitals of <b>6</b> at the optimized ground-state geometry.     | 27 |
| <b>Figure S23.</b> | Orbital energy diagram of <b>1</b> , <b>3</b> , <b>5</b> and <b>6</b> .                                                | 28 |
| <b>Figure S24.</b> | Plots of spin density (isovalue = 0.002) of the T <sub>1</sub> states of <b>1</b> , <b>3</b> , <b>5</b> and <b>6</b> . | 28 |
| <b>Figure S25.</b> | Selected structural parameters of the optimized T <sub>1</sub> geometry of <b>3</b> .                                  | 29 |
| <b>Table S5.</b>   | Relative energies of the optimized T <sub>1</sub> states of <b>1</b> , <b>3</b> , <b>5</b> and <b>6</b> .              | 30 |
| <b>Table S6.</b>   | Cartesian coordinates of the optimized ground-state geometry of <b>1</b> optimized with PBE0 functional.               | 31 |
| <b>Table S7.</b>   | Cartesian coordinates of the optimized ground-state geometry of <b>3</b> optimized with PBE0 functional.               | 32 |
| <b>Table S8.</b>   | Cartesian coordinates of the optimized ground-state geometry of <b>5</b> optimized with PBE0 functional.               | 34 |
| <b>Table S9.</b>   | Cartesian coordinates of the optimized ground-state geometry of <b>6</b> optimized with PBE0 functional.               | 36 |
| <b>Table S10.</b>  | Cartesian coordinates of the optimized ground-state geometry of <b>3</b> optimized with M06 functional.                | 37 |
| <b>Table S11.</b>  | Cartesian coordinates of the optimized ground-state geometry of <b>5</b> optimized with M06 functional.                | 39 |
| <b>Table S12.</b>  | Cartesian coordinates of the optimized ground-state geometry of <b>6</b> optimized with M06 functional.                | 41 |
| <b>Table S13.</b>  | Cartesian coordinates of the optimized T <sub>1</sub> geometry of <b>1</b> computed by DFT/CPCM.                       | 42 |
| <b>Table S14.</b>  | Cartesian coordinates of the optimized T <sub>1</sub> geometry of <b>3</b> computed by DFT/CPCM.                       | 43 |

|                                                  |                                                                                                                   |    |
|--------------------------------------------------|-------------------------------------------------------------------------------------------------------------------|----|
| <b>Table S15.</b>                                | Cartesian coordinates of the optimized T <sub>1</sub> geometry of <b>5</b> computed by DFT/CPCM.                  | 45 |
| <b>Table S16.</b>                                | Cartesian coordinates of the optimized T <sub>1</sub> geometry of <b>6</b> computed by DFT/CPCM.                  | 47 |
| <b>Table S17.</b>                                | Cartesian coordinates of the optimized S <sub>1</sub> geometry of <b>3</b> computed by TDDFT/CPCM.                | 48 |
| <b>Table S18.</b>                                | Cartesian coordinates of the optimized S <sub>1</sub> geometry of <b>5</b> computed by TDDFT/CPCM.                | 50 |
| <b>Table S19.</b>                                | Cartesian coordinates of the optimized S <sub>1</sub> geometry of <b>6</b> computed by TDDFT/CPCM.                | 52 |
| <b>Table S20.</b>                                | Cartesian coordinates of the optimized T <sub>1</sub> geometry of <b>3</b> computed by TDDFT/CPCM.                | 53 |
| <b>Table S21.</b>                                | Cartesian coordinates of the optimized T <sub>1</sub> geometry of <b>5</b> computed by TDDFT/CPCM.                | 55 |
| <b>Figure S26.</b>                               | Normalized EL spectra of solution-processed devices made with <b>1</b> at a luminance of 100 cd m <sup>-2</sup> . | 57 |
| <b>Figure S27.</b>                               | Normalized EL spectra of solution-processed devices made with <b>2</b> at a luminance of 100 cd m <sup>-2</sup> . | 57 |
| <b>Figure S28.</b>                               | Normalized EL spectra of solution-processed devices made with <b>3</b> at a luminance of 100 cd m <sup>-2</sup> . | 58 |
| <b>Figure S29.</b>                               | Normalized EL spectra of solution-processed devices made with <b>4</b> at a luminance of 100 cd m <sup>-2</sup> . | 58 |
| <b>Figure S30.</b>                               | Normalized EL spectra of solution-processed devices made with <b>5</b> at a luminance of 100 cd m <sup>-2</sup> . | 59 |
| <b>Table S22.</b>                                | Key parameters of the solution-processed OLEDs based on <b>1–5</b> .                                              | 60 |
| <b>Figure S31</b>                                | Current density–voltage–luminance ( <i>J–V–L</i> ) characteristics of                                             | 61 |
| <b>Figure S32</b>                                | <i>J–V–L</i> characteristics of solution-processed devices made with <b>2</b> .                                   | 62 |
| <b>Figure S33</b>                                | <i>J–V–L</i> characteristics of solution-processed devices made with <b>3</b> .                                   | 63 |
| <b>Figure S34</b>                                | <i>J–V–L</i> characteristics of solution-processed devices made with <b>4</b> .                                   | 64 |
| <b>Figure S35</b>                                | <i>J–V–L</i> characteristics of solution-processed devices made with <b>5</b> .                                   | 65 |
| <b>Materials and reagents</b>                    |                                                                                                                   | 66 |
| <b>Physical measurements and instrumentation</b> |                                                                                                                   | 66 |
| <b>Synthesis and characterization</b>            |                                                                                                                   | 68 |
| <b>Computational details</b>                     |                                                                                                                   | 77 |
| <b>OLED fabrication and measurements</b>         |                                                                                                                   | 78 |

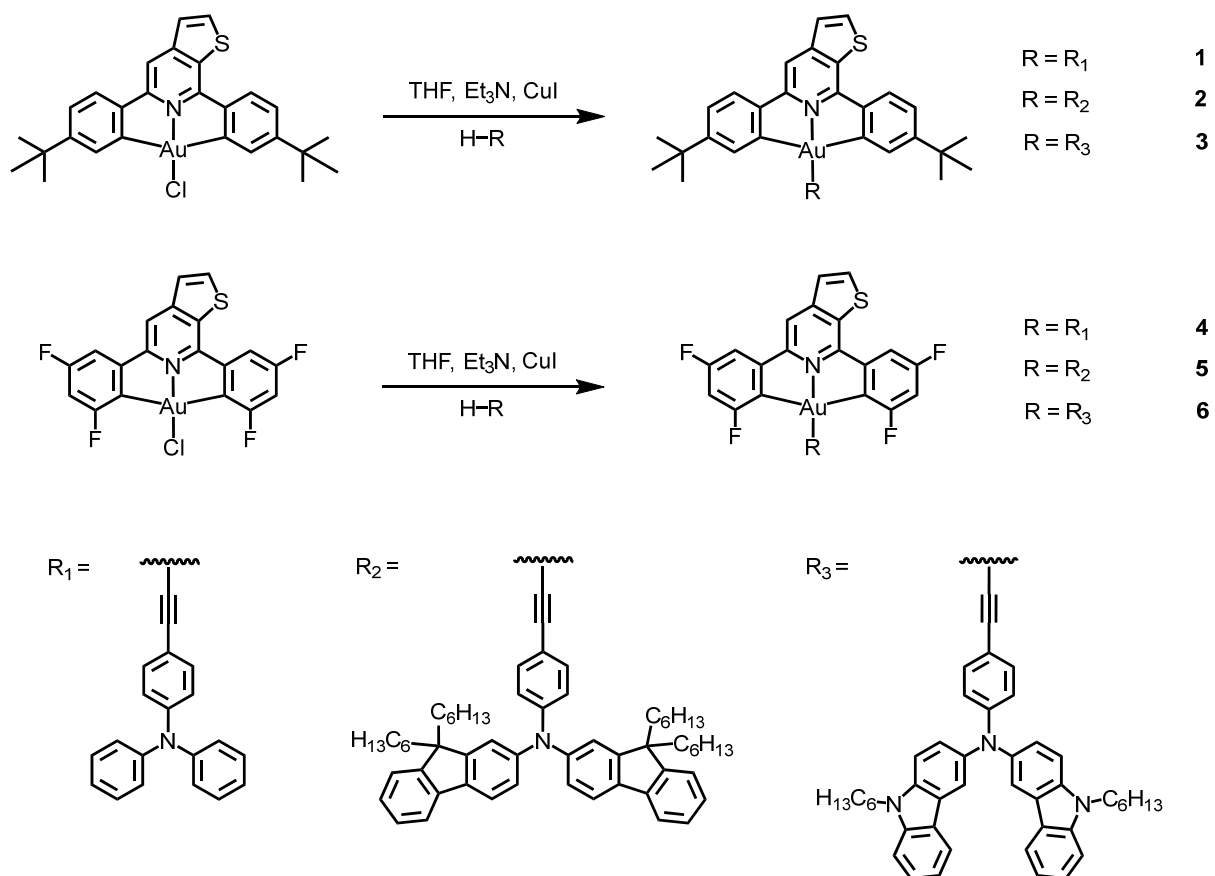

**Scheme S1.** Synthetic routes for the gold(III) complexes.

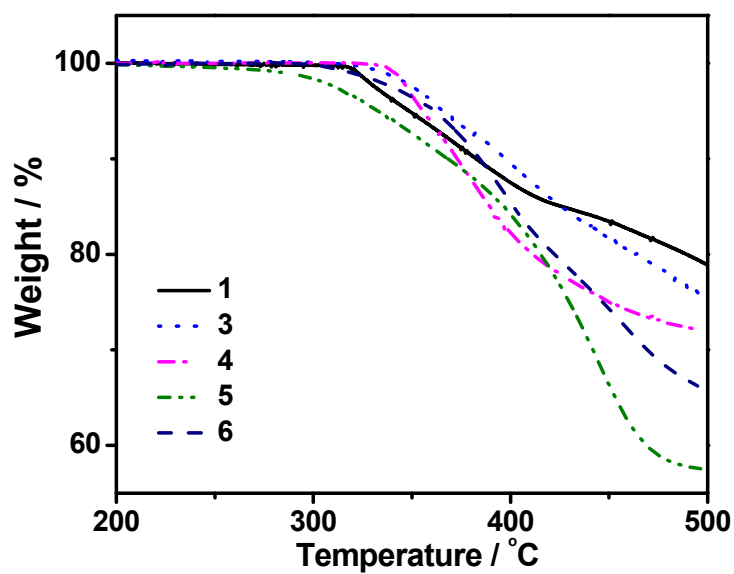

**Figure S1.** Thermogravimetric analysis (TGA) traces of **1, 3–6**.

**Table S1.** Thermal properties of **1, 3–6**.

| Complex  | $T_d^a$ / °C |
|----------|--------------|
| <b>1</b> | 347          |
| <b>3</b> | 365          |
| <b>4</b> | 354          |
| <b>5</b> | 332          |
| <b>6</b> | 363          |

<sup>a</sup>Decomposition temperature ( $T_d$ ) is defined as the temperature at which the complex shows a 5 % weight loss.

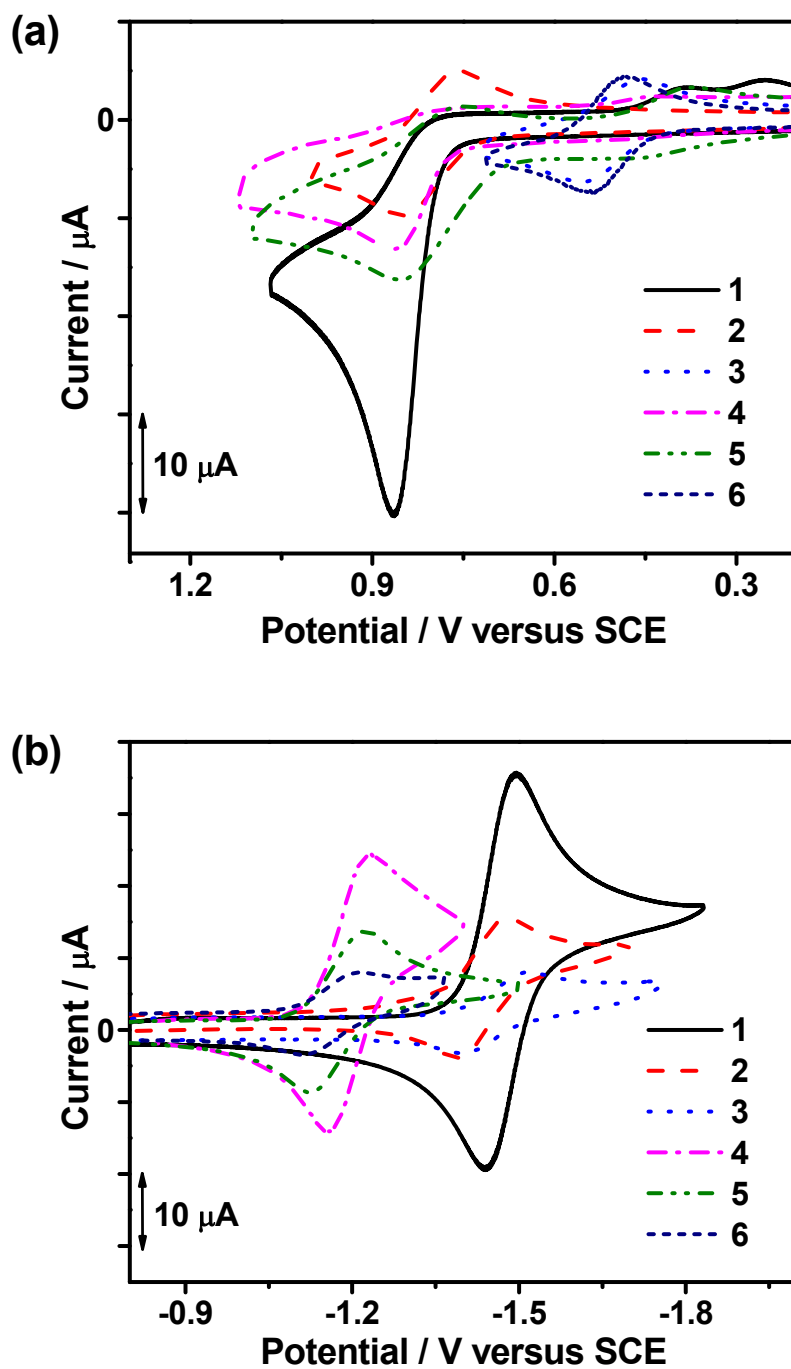

**Figure S2.** Cyclic voltammograms for the (a) oxidation and (b) reduction scans of **1–6** in dichloromethane (0.1 M  $n\text{Bu}_4\text{NPF}_6$ ).

**Table S2.** Electrochemical data of **1–6**.<sup>a</sup>

| Complex  | Oxidation $E_{1/2}^b / \text{V}$                                                                 | Reduction $E_{1/2}^b / \text{V}$                  | $E_{\text{HOMO}}$<br>/ eV <sup>e</sup> | $E_{\text{LUMO}}$<br>/ eV <sup>f</sup> | $E_{\text{HOMO}} - E_{\text{LUMO}}$<br>/ eV |
|----------|--------------------------------------------------------------------------------------------------|---------------------------------------------------|----------------------------------------|----------------------------------------|---------------------------------------------|
|          | vs. SCE ( $\Delta E_p / \text{mV}$ ) <sup>c</sup><br>[ $E_{\text{pa}}$ , V vs. SCE] <sup>d</sup> | vs. SCE ( $\Delta E_p / \text{mV}$ ) <sup>c</sup> |                                        |                                        |                                             |
| <b>1</b> | [+0.87]                                                                                          | -1.46 (58)                                        | -5.21                                  | -2.88                                  | 2.33                                        |
| <b>2</b> | +0.80 (90)                                                                                       | -1.43 (90)                                        | -5.14                                  | -2.91                                  | 2.23                                        |
| <b>3</b> | +0.54 (85), +1.04 (85)                                                                           | -1.45 (87)                                        | -4.88                                  | -2.89                                  | 1.99                                        |
| <b>4</b> | [+0.86]                                                                                          | -1.19 (63)                                        | -5.20                                  | -3.15                                  | 2.05                                        |
| <b>5</b> | +0.81 (96)                                                                                       | -1.19 (96)                                        | -5.15                                  | -3.15                                  | 2.00                                        |
| <b>6</b> | +0.51 (85), +1.05 (85)                                                                           | -1.16 (85)                                        | -4.85                                  | -3.18                                  | 1.67                                        |

<sup>a</sup> In CH<sub>2</sub>Cl<sub>2</sub> solution with 0.1 M <sup>n</sup>Bu<sub>4</sub>NPF<sub>6</sub> as supporting electrolyte at 298 K working electrode, glassy carbon; scan rate = 100 mV s<sup>-1</sup>.

<sup>b</sup>  $E_{1/2} = (E_{\text{pa}} + E_{\text{pc}})/2$ ;  $E_{\text{pa}}$  and  $E_{\text{pc}}$  are the peak anodic and peak cathodic potentials, respectively.

<sup>c</sup>  $\Delta E_p = (E_{\text{pa}} - E_{\text{pc}})$ .

<sup>d</sup>  $E_{\text{pa}}$  refers to the anodic peak potential for the irreversible oxidation waves.

<sup>e</sup>  $E_{\text{HOMO}}$  levels were calculated from electrode potentials, i.e.,  $E_{\text{HOMO}} = -[E_{\text{pa}} (\text{vs. Fc}^+/\text{Fc}) + 4.80] \text{ eV}$  or  $E_{\text{HOMO}} = -[E_{1/2}^{\text{ox}} (\text{vs. Fc}^+/\text{Fc}) + 4.80] \text{ eV}$ .  $E^\circ(\text{Fc}^+/\text{Fc}) = +0.46 \text{ V vs. SCE}$  in CH<sub>2</sub>Cl<sub>2</sub> (0.1 M <sup>n</sup>Bu<sub>4</sub>NPF<sub>6</sub>). From ref. 1.

<sup>f</sup>  $E_{\text{LUMO}}$  levels were calculated from electrode potentials, i.e.,  $E_{\text{LUMO}} = -[E_{\text{pc}} (\text{vs. Fc}^+/\text{Fc}) + 4.80] \text{ eV}$  or  $E_{\text{LUMO}} = -[E_{1/2}^{\text{red}} (\text{vs. Fc}^+/\text{Fc}) + 4.80] \text{ eV}$ .  $E^\circ(\text{Fc}^+/\text{Fc}) = +0.46 \text{ V vs. SCE}$  in CH<sub>2</sub>Cl<sub>2</sub> (0.1 M <sup>n</sup>Bu<sub>4</sub>NPF<sub>6</sub>). From ref. 1.



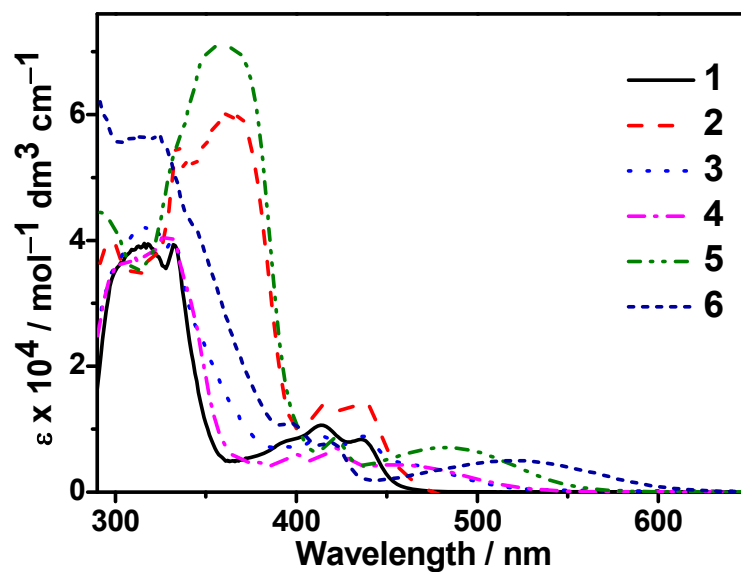

*Figure S3.* UV-Visible absorption spectra of 1–6 in toluene at 298 K.

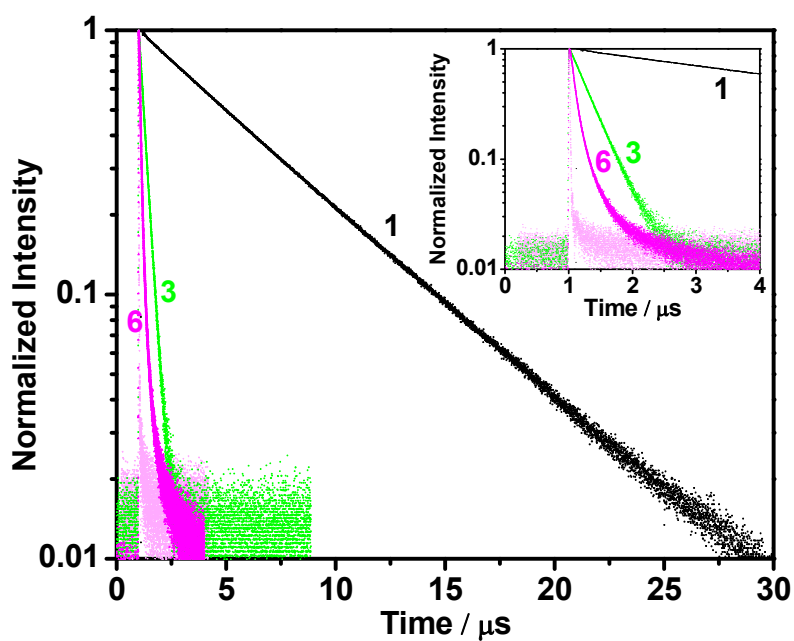

*Figure S4.* Time-resolved photoluminescence decay profiles of 1, 3 and 6 in toluene at 298 K.

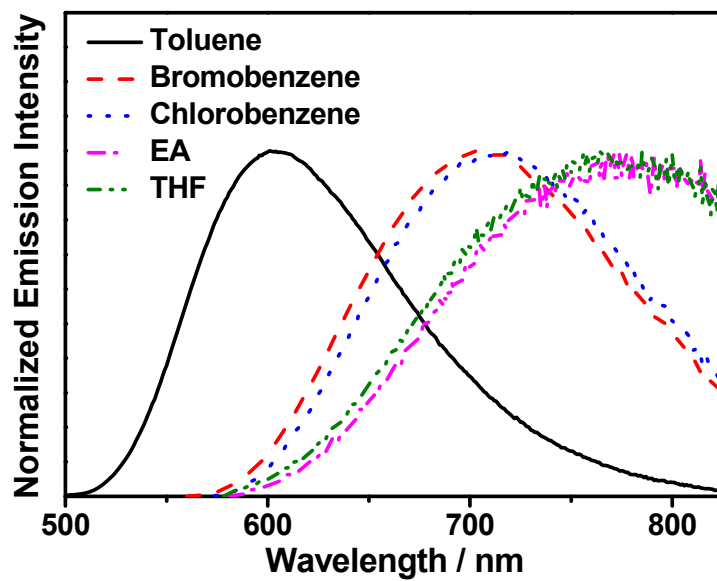

**Figure S5.** Normalized solvent-dependent emission spectra of **3** in various solvents at 298 K.

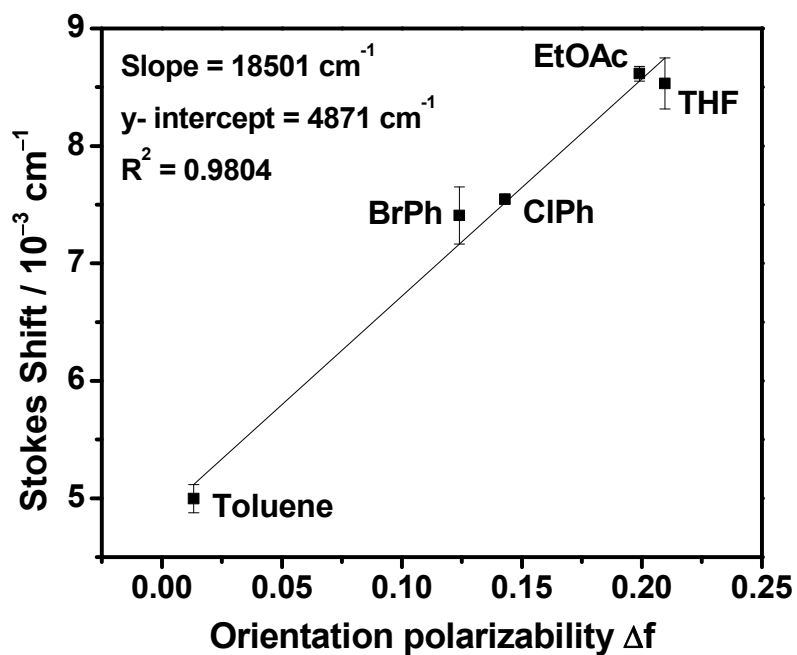

**Figure S6.** Lippert-Mataga plot of **3** in various solvents at 298 K.

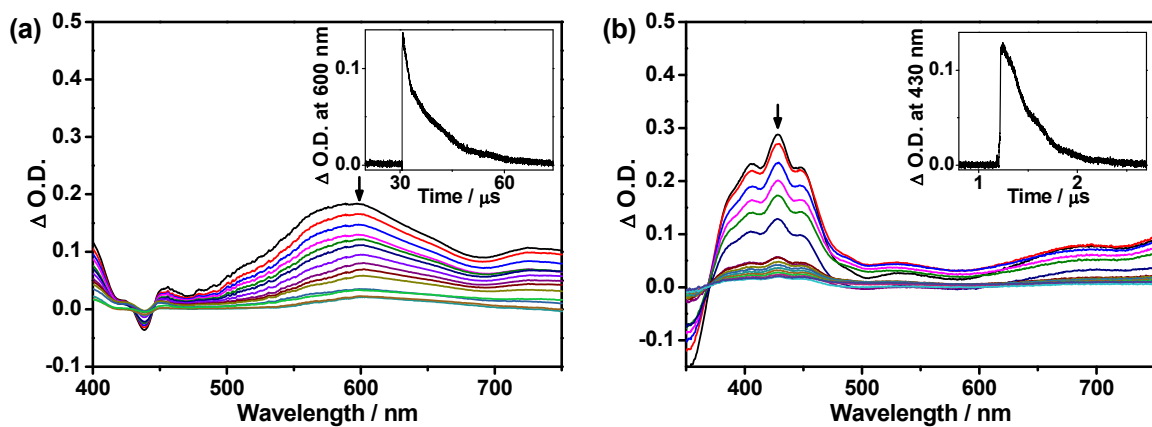

**Figure S7.** Transient absorption spectra of (a) **1** in degassed toluene at 298 K at decay times of 0–10  $\mu\text{s}$  and the decay trace monitored at 600 nm in the inset and (b) **3** in degassed toluene at 298 K at decay times of 0–1  $\mu\text{s}$  and the decay trace monitored at 430 nm in the inset.

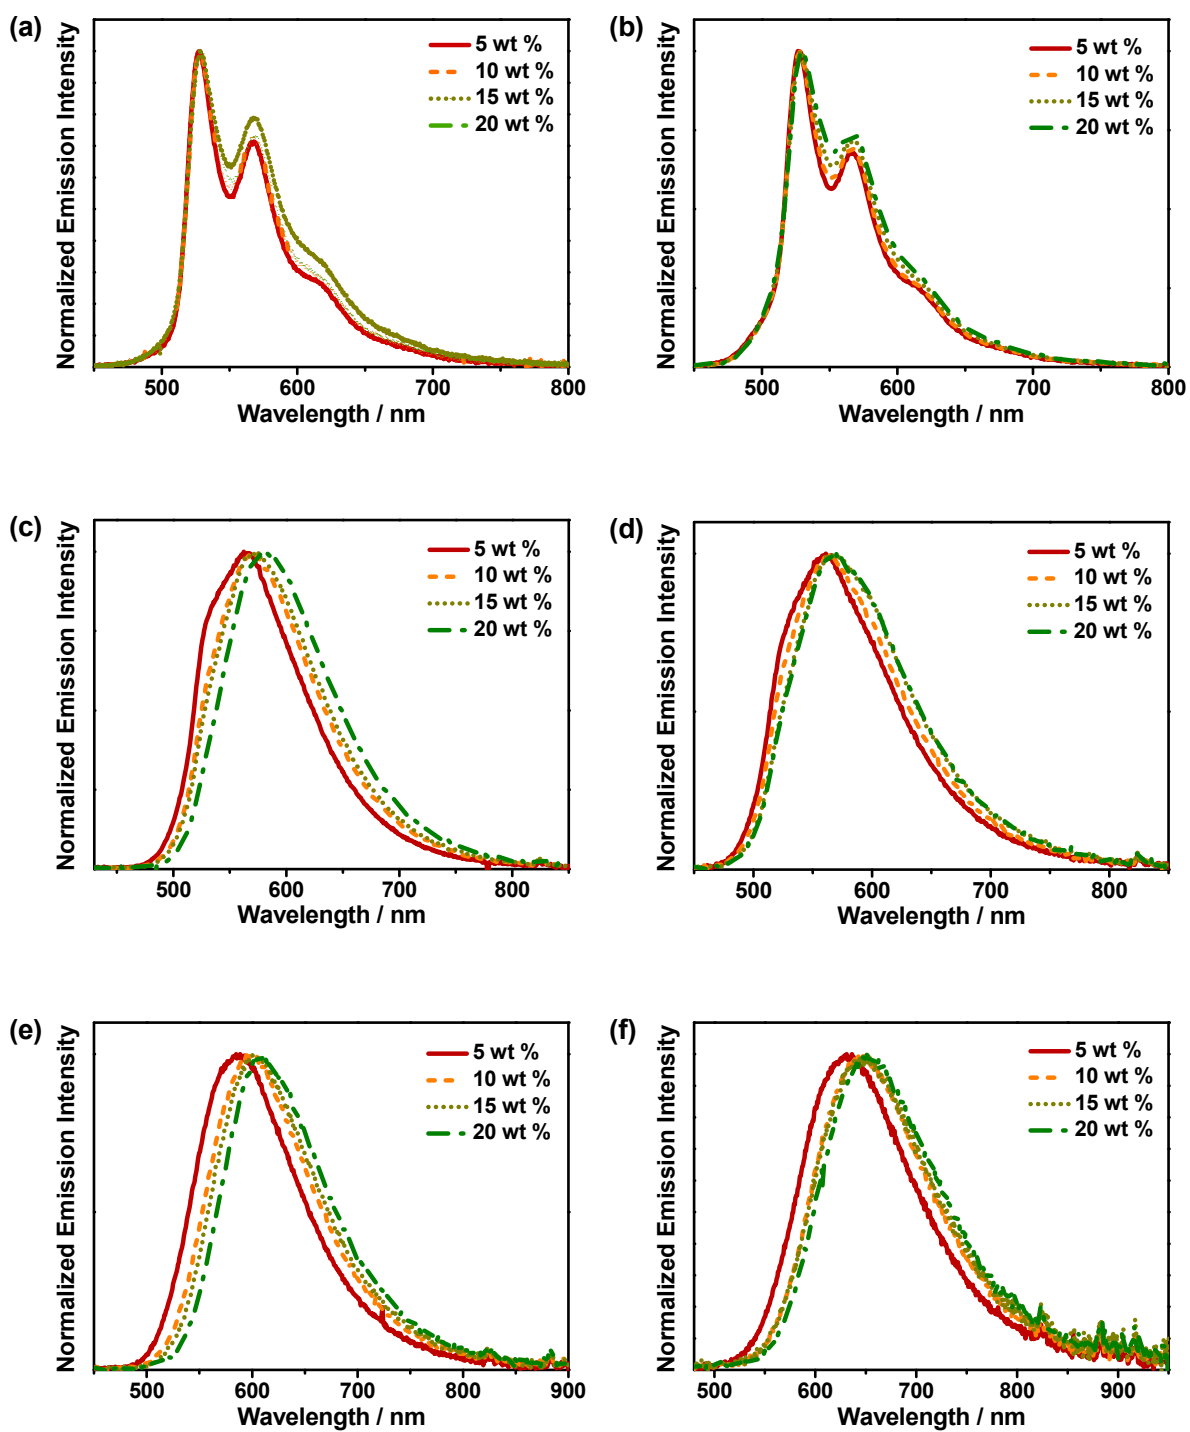

**Figure S8.** Normalized emission spectra of doped mCP thin films of (a) **1**, (b) **2**, (c) **3**, (d) **4**, (e) **5** and (f) **6** at different concentrations.

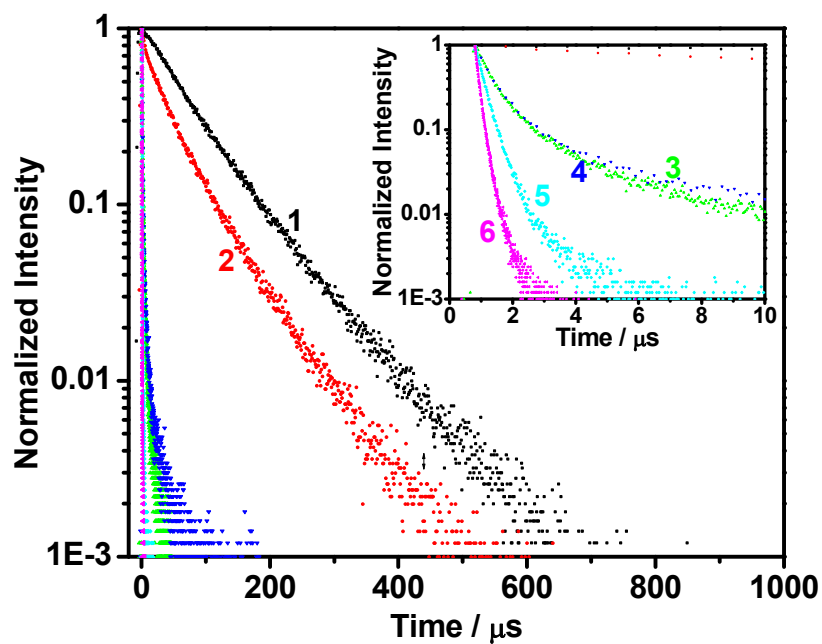

*Figure S9.* Time-resolved photoluminescence decay profiles of 1–6 in 10 wt % doped mCP thin film at 298 K and the decay profiles of 3–6 from 0 to 10  $\mu\text{s}$  in the inset.

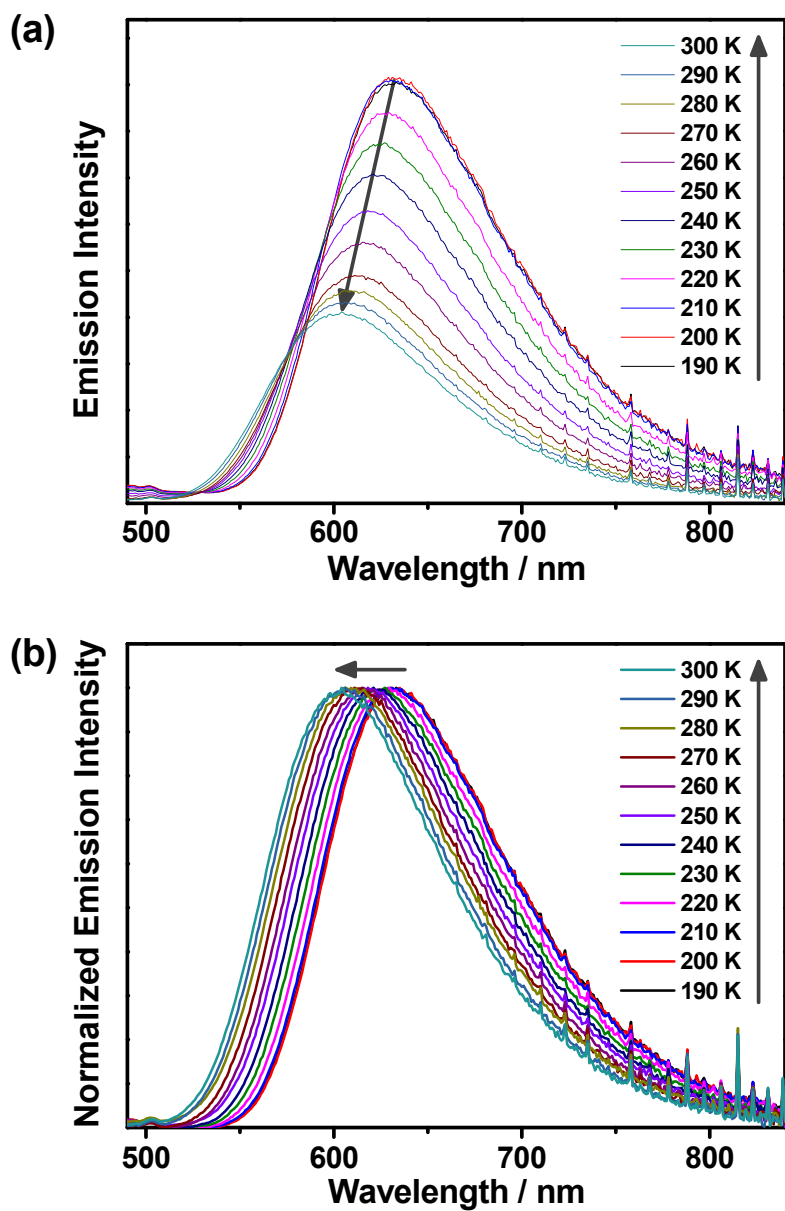

**Figure S10.** (a) Emission spectra and (b) normalized emission spectra of **3** in degassed toluene upon increasing temperature from 190 K to 300 K.

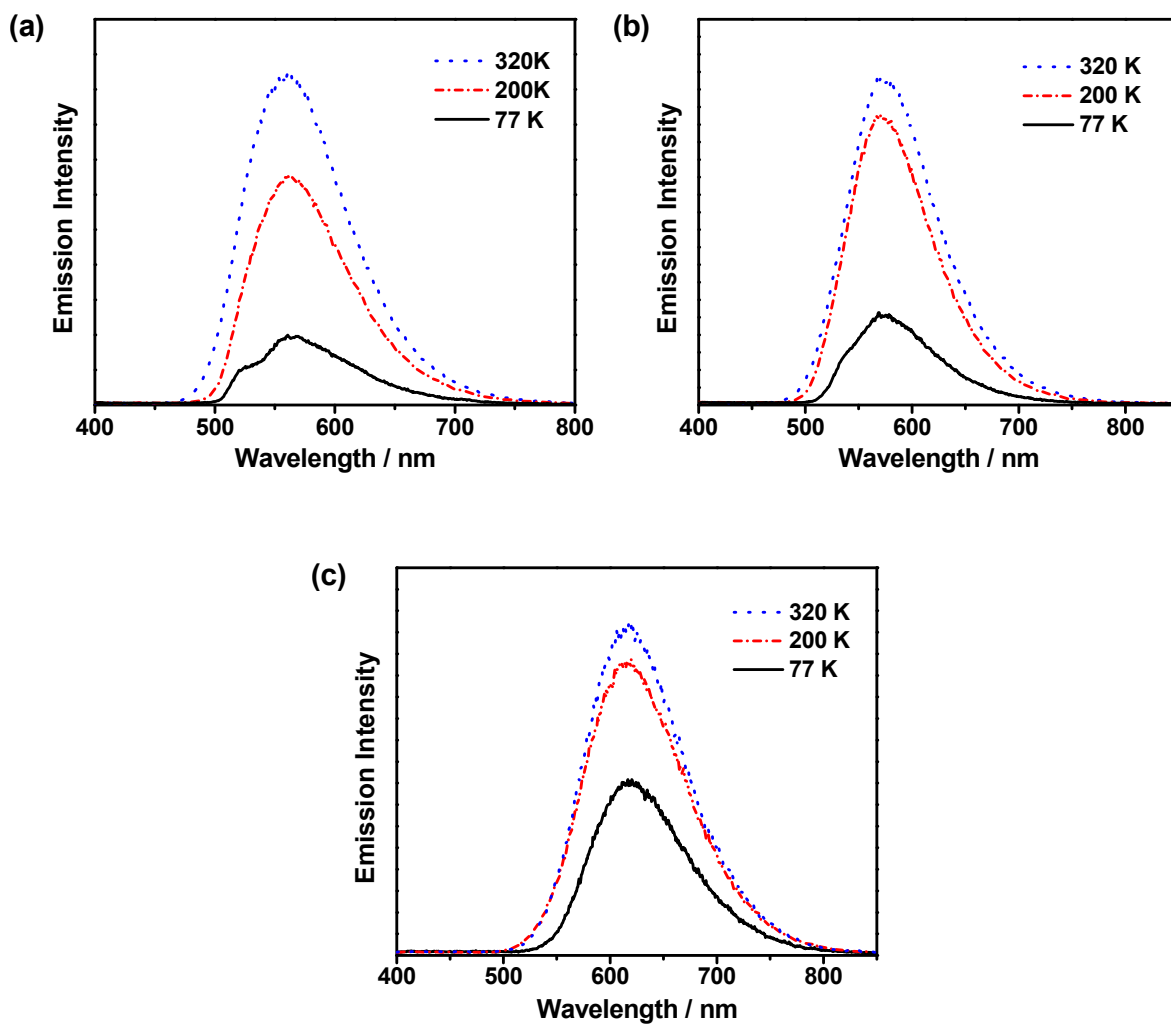

**Figure S11.** Emission spectra of (a) **4**, (b) **5** and (c) **6** in 5 wt % doped mCP thin film at 77, 200 and 320 K.

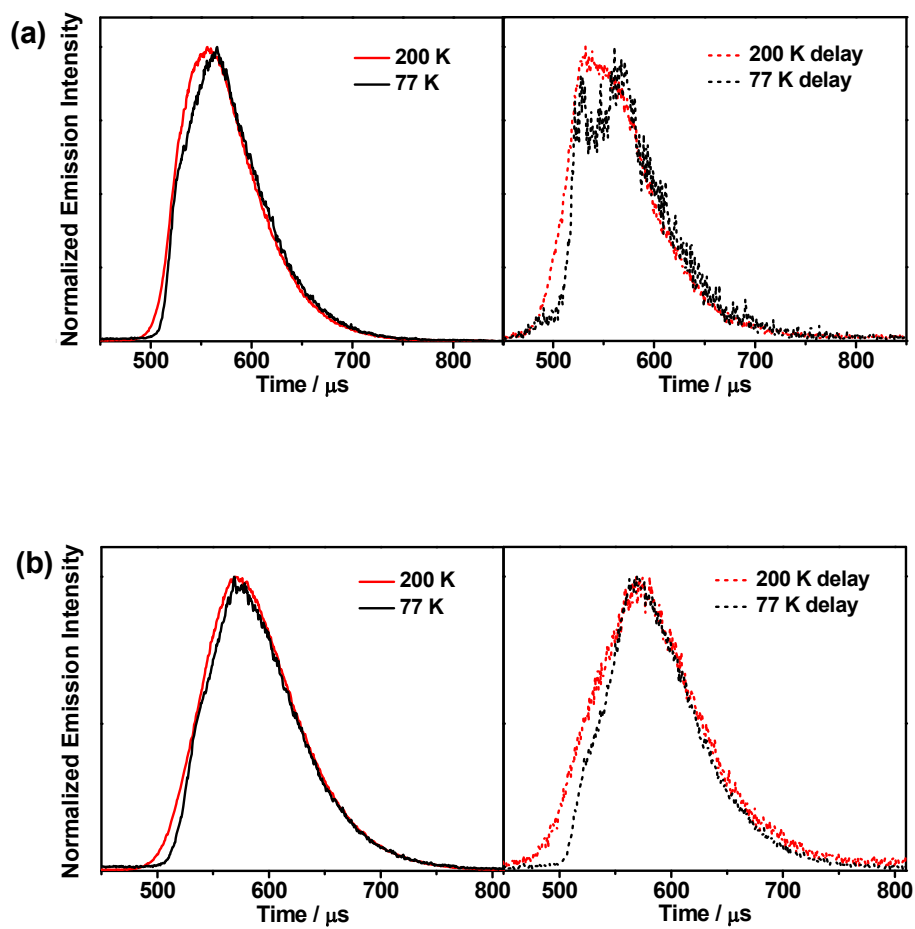

**Figure S12.** Time-resolved emission spectra of (a) **3** and (b) **5** recorded at delay times of 0  $\mu\text{s}$  (prompt) and 5  $\mu\text{s}$  (delayed) in 5 wt % doped mCP thin film at 77 and 200 K.



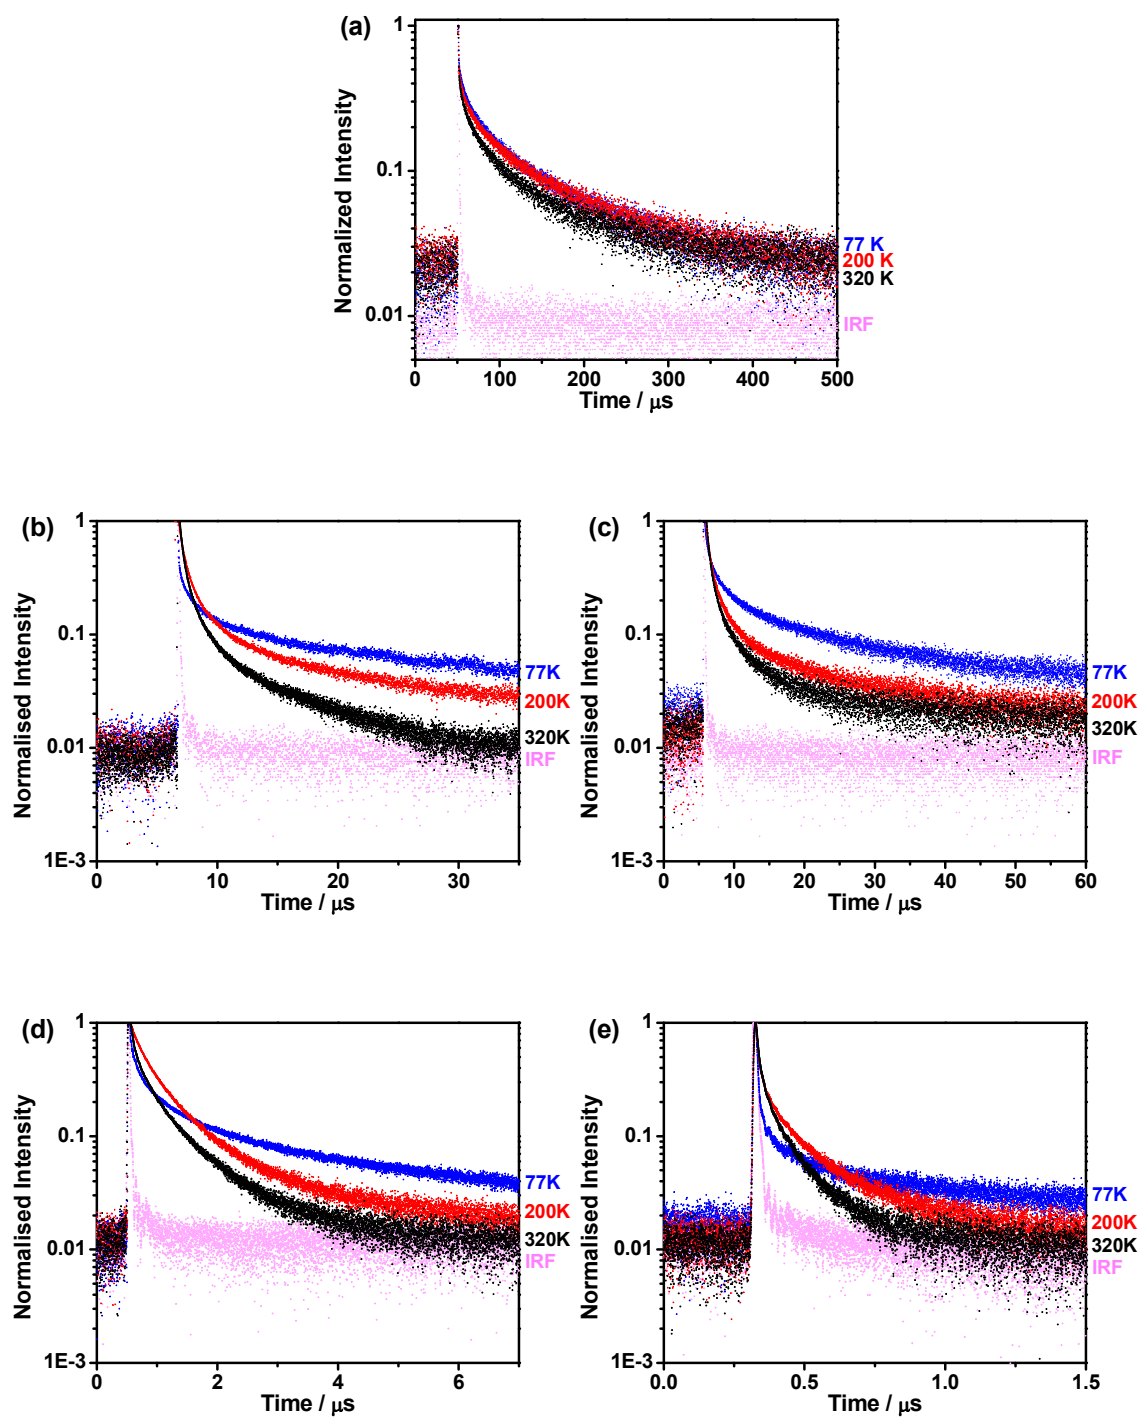

**Figure S13.** Time-resolved photoluminescence decay profiles of (a) **1**, (b) **3**, (c) **4**, (d) **5** and (e) **6** in 5 wt % doped mCP thin film at 77, 200 and 320 K respectively.

**Table S3.** Emission lifetime ( $\mu\text{s}$ ) of **1**, **3**, **4**, **5** and **6** in 5 wt % doped mCP thin film at various temperature.

| Temperature (K) | <b>1</b> | <b>3</b> | <b>4</b> | <b>5</b> | <b>6</b> |
|-----------------|----------|----------|----------|----------|----------|
| 77              | 92.51    | 34.05    | 21.30    | 5.73     | 0.32     |
| 100             | -        | 25.95    | 17.09    | 4.35     | 0.29     |
| 120             | 92.08    | 19.38    | 14.09    | 3.46     | 0.25     |
| 140             | -        | 14.90    | 12.22    | 2.53     | 0.24     |
| 160             | 91.55    | 11.23    | 11.21    | 2.02     | 0.21     |
| 180             | -        | 9.30     | 10.26    | 1.43     | 0.20     |
| 200             | 89.99    | 7.64     | 9.25     | 1.02     | 0.19     |
| 220             | -        | 6.21     | 8.79     | 0.78     | 0.17     |
| 240             | 88.33    | 5.65     | 7.67     | 0.70     | 0.17     |
| 260             | -        | 5.01     | 7.17     | 0.62     | 0.15     |
| 280             | 86.98    | 4.68     | 6.98     | 0.55     | 0.15     |
| 300             | -        | 4.00     | 6.09     | 0.51     | 0.15     |
| 320             | 85.09    | 3.80     | 5.64     | 0.47     | 0.15     |
| 340             | -        | 3.60     | 5.34     | 0.45     | 0.15     |
| 360             | -        | 3.41     | 4.97     | 0.44     | 0.15     |

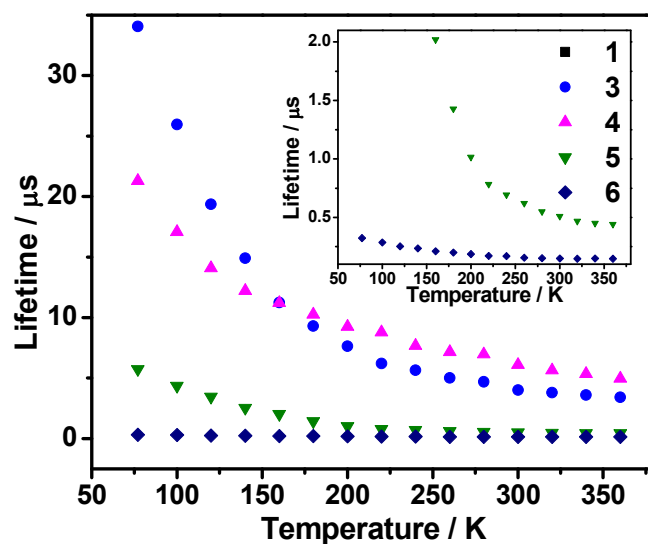

**Figure S14.** Plot of the emission lifetime of **1**, **3**, **4**, **5** and **6** in 5 wt % doped mCP thin film against temperature.

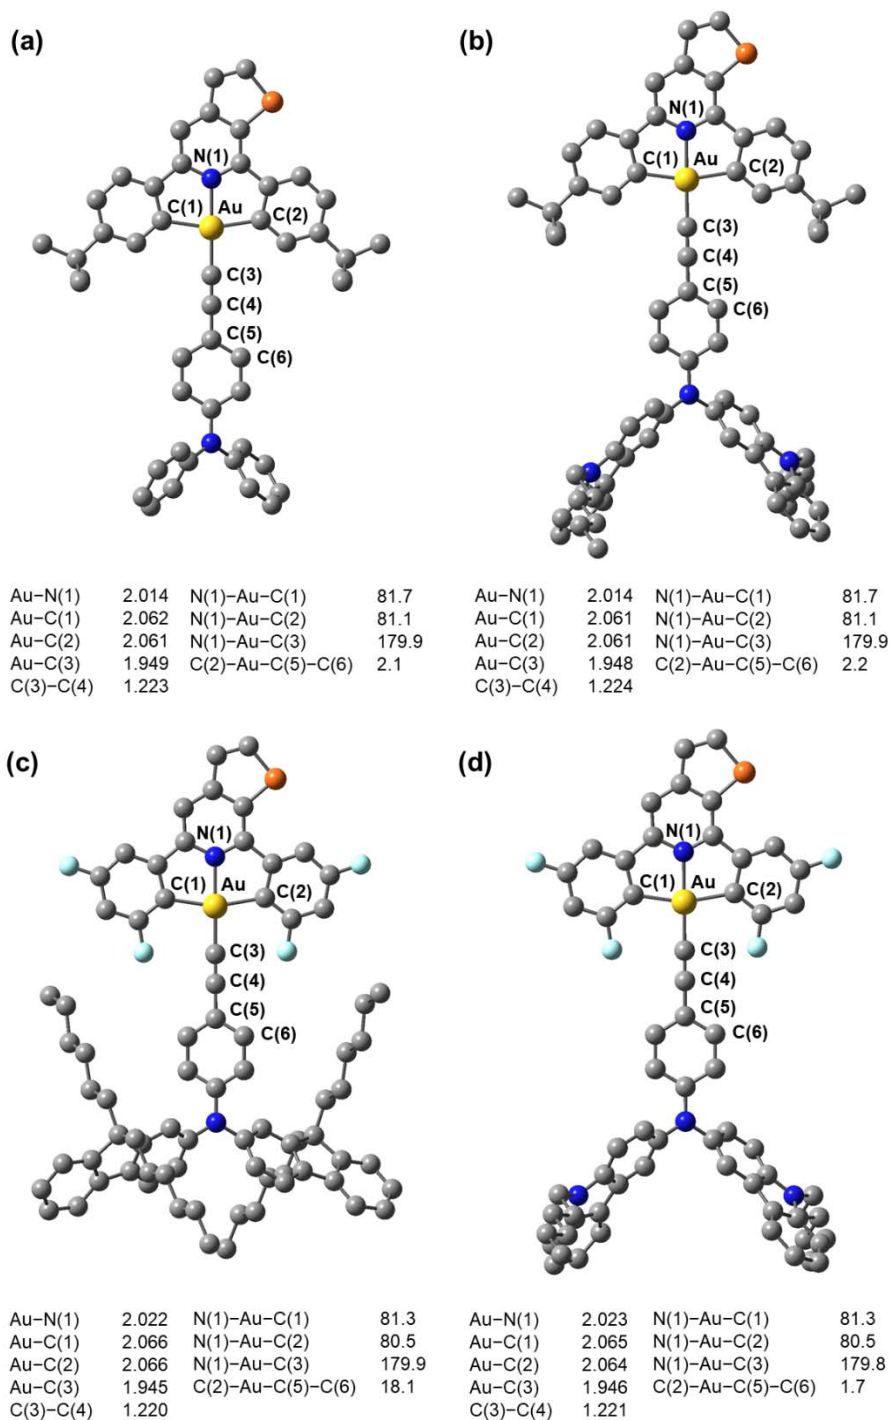

**Figure S15.** Optimized ground-state geometries with selected structural parameters of (a) **1**, (b) **3**, (c) **5** and (d) **6** at the PBE0 level of theory. The bond lengths and angles are in Angstroms and degrees, respectively. All hydrogen atoms are omitted for clarity.

**Table S4.** First twenty-five singlet excited states ( $S_n$ ) of **1**, **3**, **5** and **6** computed by DDFT/CPCM using toluene as the solvent.

| Complex  | $S_n$          | Excitation <sup>a</sup><br>(Coefficient) <sup>b</sup> | Vertical excitation<br>wavelength / nm | $f^c$   | Character <sup>d</sup> |
|----------|----------------|-------------------------------------------------------|----------------------------------------|---------|------------------------|
| <b>1</b> | $S_1$          | H→L (0.70)                                            | 485                                    | 0.218   | LLCT                   |
|          | $S_2$          | H-1→L (0.69)                                          | 402                                    | 0.123   | IL/ILCT                |
|          | $S_3$          | H→L+1 (0.70)                                          | 375                                    | 0.072   | LLCT                   |
|          | $S_4$          | H-2→L (0.68)                                          | 372                                    | 0.000   | LLCT/ILCT              |
|          | $S_5$          | H→L+2 (0.52)                                          | 337                                    | 0.703   | IL/ILCT                |
|          |                | H-3→L (0.41)                                          |                                        |         | LLCT                   |
|          | $S_6$          | H-3→L (0.54)                                          | 329                                    | 0.146   | LLCT                   |
|          |                | H→L+2 (-0.40)                                         |                                        |         | IL/ILCT                |
|          | $S_7$          | H-4→L (0.68)                                          | 322                                    | 0.116   | ILCT/IL                |
|          | $S_8$          | H→L+4 (0.69)                                          | 314                                    | 0.022   | IL                     |
|          | $S_9$          | H-5→L (0.47)                                          | 311                                    | 0.089   | ILCT/IL                |
|          |                | H-1→L+1 (-0.44)                                       |                                        |         | IL                     |
|          | $S_{10}$       | H-5→L (0.51)                                          | 310                                    | 0.269   | ILCT/IL                |
|          |                | H-1→L+1 (0.39)                                        |                                        |         | IL                     |
|          | $S_{11}$       | H→L+6 (0.69)                                          | 305                                    | 0.277   | ILCT/IL                |
|          | $S_{12}$       | H-2→L+1 (0.67)                                        | 303                                    | 0.000   | LLCT/ILCT              |
|          | $S_{13}$       | H-8→L (0.56)                                          | 293                                    | 0.363   | ILCT/IL                |
|          |                | H-1→L+1 (-0.35)                                       |                                        |         | IL                     |
|          | $S_{14}$       | H-9→L (0.63)                                          | 292                                    | 0.009   | LLCT/ILCT              |
|          | $S_{15}$       | H→L+5 (0.64)                                          | 292                                    | 0.001   | LLCT                   |
|          | $S_{16}$       | H→L+3 (0.62)                                          | 284                                    | 0.071   | LLCT/IL                |
|          | $S_{17}$       | H-12→L (0.45)                                         | 279                                    | 0.086   | IL                     |
|          |                | H-3→L+1 (-0.42)                                       |                                        |         | LLCT                   |
|          | $S_{18}$       | H-6→L (0.59)                                          | 278                                    | 0.012   | LLCT                   |
|          |                | H→L+9 (0.26)                                          |                                        |         | IL                     |
| $S_{19}$ | H-3→L+1 (0.50) | 276                                                   | 0.069                                  | LLCT    |                        |
|          | H-12→L (0.41)  |                                                       |                                        | IL      |                        |
| $S_{20}$ | H→L+7 (0.47)   | 273                                                   | 0.023                                  | LLCT    |                        |
|          | H→L+8 (-0.44)  |                                                       |                                        | IL/ILCT |                        |
| $S_{21}$ | H→L+8 (0.46)   | 272                                                   | 0.017                                  | IL/ILCT |                        |
|          | H→L+7 (0.44)   |                                                       |                                        | LLCT    |                        |
| $S_{22}$ | H→L+9 (0.47)   | 272                                                   | 0.030                                  | IL      |                        |
|          | H-6→L (-0.36)  |                                                       |                                        | LLCT    |                        |
|          | H→L+10 (-0.34) |                                                       |                                        | IL      |                        |
| $S_{23}$ | H-4→L+1 (0.53) | 271                                                   | 0.027                                  | IL/ILCT |                        |
| $S_{24}$ | H-7→L (0.61)   | 269                                                   | 0.008                                  | LLCT    |                        |
| $S_{25}$ | H-5→L+1 (0.55) | 268                                                   | 0.110                                  | IL/ILCT |                        |

|                 |                 |                 |       |           |           |
|-----------------|-----------------|-----------------|-------|-----------|-----------|
| 3               | S <sub>1</sub>  | H→L (0.70)      | 554   | 0.213     | LLCT      |
|                 | S <sub>2</sub>  | H→L+1 (0.70)    | 417   | 0.045     | LLCT      |
|                 | S <sub>3</sub>  | H-3→L (0.68)    | 401   | 0.131     | IL/ILCT   |
|                 | S <sub>4</sub>  | H→L+2 (0.70)    | 388   | 0.037     | IL/ILCT   |
|                 | S <sub>5</sub>  | H-2→L (0.66)    | 379   | 0.171     | LLCT      |
|                 | S <sub>6</sub>  | H-6→L (0.69)    | 375   | 0.003     | LLCT/ILCT |
|                 | S <sub>7</sub>  | H-1→L (0.71)    | 366   | 0.002     | LLCT      |
|                 | S <sub>8</sub>  | H→L+3 (0.62)    | 361   | 0.151     | IL        |
|                 |                 | H→L+4 (0.30)    |       |           | IL        |
|                 | S <sub>9</sub>  | H→L+4 (0.56)    | 348   | 0.775     | IL        |
|                 | S <sub>10</sub> | H-5→L (0.64)    | 338   | 0.016     | LLCT      |
|                 | S <sub>11</sub> | H-4→L (0.70)    | 335   | 0.001     | LLCT      |
|                 | S <sub>12</sub> | H-8→L (0.67)    | 322   | 0.112     | ILCT/IL   |
|                 | S <sub>13</sub> | H-9→L (0.43)    | 311   | 0.075     | ILCT/IL   |
|                 |                 | H-3→L+1 (-0.41) |       |           | IL        |
|                 | S <sub>14</sub> | H→L+6 (0.66)    | 311   | 0.017     | LLCT      |
|                 | S <sub>15</sub> | H-9→L (0.51)    | 310   | 0.251     | ILCT/IL   |
|                 |                 | H-3→L+1 (0.37)  |       |           | IL        |
|                 | S <sub>16</sub> | H→L+8 (0.66)    | 309   | 0.309     | IL/ILCT   |
|                 | S <sub>17</sub> | H-2→L+1 (0.65)  | 308   | 0.014     | LLCT      |
|                 | S <sub>18</sub> | H→L+5 (0.51)    | 305   | 0.127     | LLCT/IL   |
|                 |                 | H-6→L+1 (0.32)  |       |           | LLCT/IL   |
|                 | S <sub>19</sub> | H-6→L+1 (0.61)  | 305   | 0.031     | LLCT/IL   |
|                 | S <sub>20</sub> | H-1→L+1 (0.70)  | 300   | 0.003     | LLCT      |
|                 | S <sub>21</sub> | H→L+9 (0.48)    | 299   | 0.230     | IL/ILCT   |
| H-2→L+2 (-0.37) |                 | IL/ILCT         |       |           |           |
| S <sub>22</sub> | H-1→L+2 (0.50)  | 297             | 0.081 | IL        |           |
|                 | H-7→L (0.31)    |                 |       | LLCT      |           |
| S <sub>23</sub> | H-7→L (0.39)    | 296             | 0.032 | LLCT      |           |
|                 | H-1→L+2 (-0.37) |                 |       | IL        |           |
| S <sub>24</sub> | H-11→L (-0.31)  | 294             | 0.004 | ILCT/IL   |           |
|                 | H-12→L (0.67)   |                 |       | LLCT/ILCT |           |
| S <sub>25</sub> | H→L+9 (0.39)    | 293             | 0.051 | IL/ILCT   |           |
|                 | H-2→L+2 (0.38)  |                 |       | IL/ILCT   |           |
| 5               | S <sub>1</sub>  | H→L (0.70)      | 609   | 0.161     | LLCT      |
|                 | S <sub>2</sub>  | H→L+1 (0.70)    | 454   | 0.028     | LLCT      |
|                 | S <sub>3</sub>  | H-1→L (0.62)    | 406   | 0.062     | LLCT      |
|                 | S <sub>4</sub>  | H-4→L (0.65)    | 393   | 0.040     | IL        |
|                 | S <sub>5</sub>  | H-3→L (0.55)    | 380   | 0.326     | LLCT/ILCT |
|                 | S <sub>6</sub>  | H→L+3 (0.70)    | 375   | 0.880     | IL/ILCT   |
|                 | S <sub>7</sub>  | H-2→L (0.70)    | 369   | 0.025     | LLCT      |
|                 | S <sub>8</sub>  | H→L+2 (0.58)    | 369   | 0.386     | IL        |

|                 |                 |     |       |           |
|-----------------|-----------------|-----|-------|-----------|
| S <sub>9</sub>  | H→L+4 (0.68)    | 343 | 0.003 | LLCT      |
| S <sub>10</sub> | H-7→L (0.62)    | 336 | 0.212 | ILCT/IL   |
| S <sub>11</sub> | H→L+7 (0.69)    | 330 | 0.039 | IL        |
| S <sub>12</sub> | H-1→L+1 (0.65)  | 329 | 0.012 | LLCT      |
| S <sub>13</sub> | H→L+5 (0.64)    | 322 | 0.002 | LLCT/IL   |
| S <sub>14</sub> | H-11→L (0.58)   | 321 | 0.031 | ILCT/IL   |
| S <sub>15</sub> | H-3→L+1 (0.64)  | 311 | 0.025 | LLCT/ILCT |
| S <sub>16</sub> | H-5→L (0.55)    | 309 | 0.009 | LLCT      |
| S <sub>17</sub> | H-6→L (0.59)    | 307 | 0.004 | LLCT      |
|                 | H-9→L (0.34)    |     |       | LLCT      |
| S <sub>18</sub> | H-5→L (0.41)    | 306 | 0.058 | LLCT      |
|                 | H-4→L+1 (-0.40) |     |       | IL        |
| S <sub>19</sub> | H-2→L+1 (0.69)  | 306 | 0.005 | LLCT      |
| S <sub>20</sub> | H→L+6 (0.57)    | 303 | 0.074 | LLCT/IL   |
|                 | H→L+8 (-0.32)   |     |       | IL        |
| S <sub>21</sub> | H-8→L (0.44)    | 302 | 0.106 | LLCT      |
|                 | H-4→L+1 (0.33)  |     |       | IL        |
| S <sub>22</sub> | H-9→L (0.57)    | 301 | 0.002 | LLCT      |
|                 | H-6→L (-0.37)   |     |       | LLCT      |
| S <sub>23</sub> | H→L+8 (0.53)    | 297 | 0.003 | IL        |
|                 | H→L+6 (0.36)    |     |       | LLCT/IL   |
| S <sub>24</sub> | H-13→L (0.46)   | 291 | 0.050 | ILCT/IL   |
|                 | H-10→L (-0.39)  |     |       | LLCT      |
| S <sub>25</sub> | H-13→L (0.44)   | 289 | 0.276 | ILCT/IL   |
|                 | H-10→L (0.39)   |     |       | LLCT      |

6

|                 |                |     |       |           |
|-----------------|----------------|-----|-------|-----------|
| S <sub>1</sub>  | H→L (0.70)     | 662 | 0.213 | LLCT      |
| S <sub>2</sub>  | H→L+1 (0.70)   | 486 | 0.029 | LLCT      |
| S <sub>3</sub>  | H-2→L (0.67)   | 425 | 0.109 | LLCT      |
| S <sub>4</sub>  | H-1→L (0.71)   | 410 | 0.002 | LLCT      |
| S <sub>5</sub>  | H-5→L (0.69)   | 401 | 0.000 | LLCT/ILCT |
| S <sub>6</sub>  | H-6→L (0.69)   | 393 | 0.044 | IL        |
| S <sub>7</sub>  | H→L+2 (0.70)   | 389 | 0.037 | IL/ILCT   |
| S <sub>8</sub>  | H-4→L (0.65)   | 376 | 0.091 | LLCT      |
| S <sub>9</sub>  | H-3→L (0.71)   | 371 | 0.001 | LLCT      |
| S <sub>10</sub> | H→L+5 (0.58)   | 363 | 0.383 | IL/ILCT   |
|                 | H→L+3 (-0.37)  |     |       | LLCT      |
| S <sub>11</sub> | H→L+4 (0.68)   | 358 | 0.000 | LLCT      |
| S <sub>12</sub> | H→L+3 (0.47)   | 356 | 0.367 | LLCT      |
|                 | H→L+5 (0.36)   |     |       | IL/ILCT   |
|                 | H→L+6 (-0.31)  |     |       | LLCT/IL   |
| S <sub>13</sub> | H-2→L+1 (0.67) | 344 | 0.003 | LLCT      |
| S <sub>14</sub> | H-8→L (0.69)   | 336 | 0.210 | ILCT/IL   |
| S <sub>15</sub> | H-1→L+1 (0.70) | 334 | 0.001 | LLCT      |

|                 |                |     |       |           |
|-----------------|----------------|-----|-------|-----------|
| S <sub>16</sub> | H→L+6 (0.57)   | 329 | 0.294 | LLCT/IL   |
|                 | H→L+3 (0.33)   |     |       | LLCT      |
| S <sub>17</sub> | H-5→L+1 (0.69) | 324 | 0.000 | LLCT/ILCT |
| S <sub>18</sub> | H-9→L (0.54)   | 323 | 0.006 | LLCT      |
|                 | H-7→L (-0.39)  |     |       | LLCT      |
| S <sub>19</sub> | H-10→L (0.33)  | 318 | 0.008 | ILCT/IL   |
|                 | H-7→L (0.54)   |     |       | LLCT      |
| S <sub>20</sub> | H-4→L+1 (0.65) | 311 | 0.009 | LLCT      |
| S <sub>21</sub> | H→L+8 (0.68)   | 310 | 0.308 | IL/ILCT   |
| S <sub>22</sub> | H-3→L+1 (0.70) | 307 | 0.002 | LLCT      |
| S <sub>23</sub> | H-9→L (0.67)   | 305 | 0.015 | LLCT      |
| S <sub>24</sub> | H-6→L+1 (0.57) | 305 | 0.223 | IL        |
| S <sub>25</sub> | H→L+7 (0.66)   | 302 | 0.084 | IL/LLCT   |

<sup>a</sup> Orbitals involved in the major excitation (H = HOMO and L = LUMO).

<sup>b</sup> The coefficients in the configuration interaction (CI) expansion that are less than 0.3 are not listed.

<sup>c</sup> Oscillator strengths.

<sup>d</sup> Character of the transition.

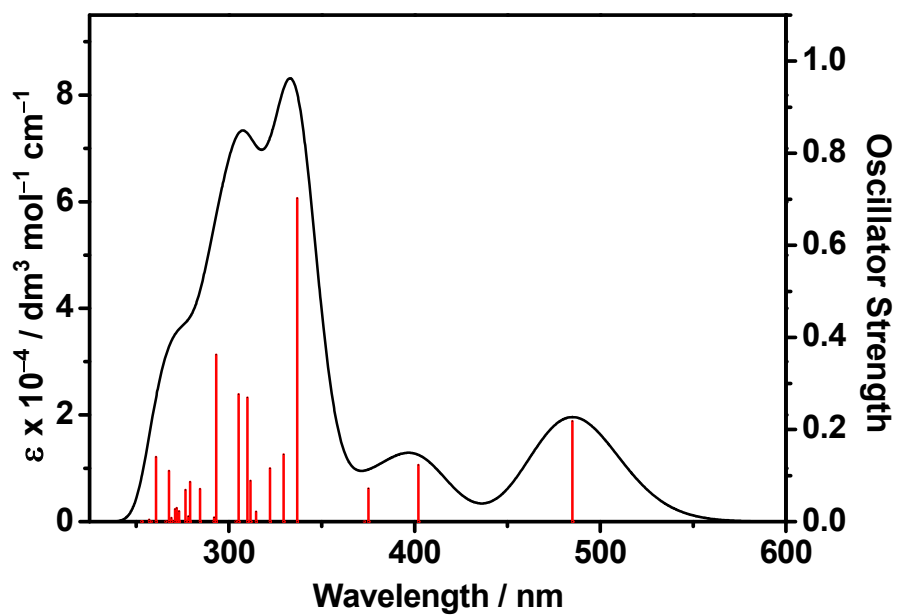

**Figure S16.** Simulated UV-vis spectrum of **1** computed by TDDFT/CPCM using toluene as the solvent.

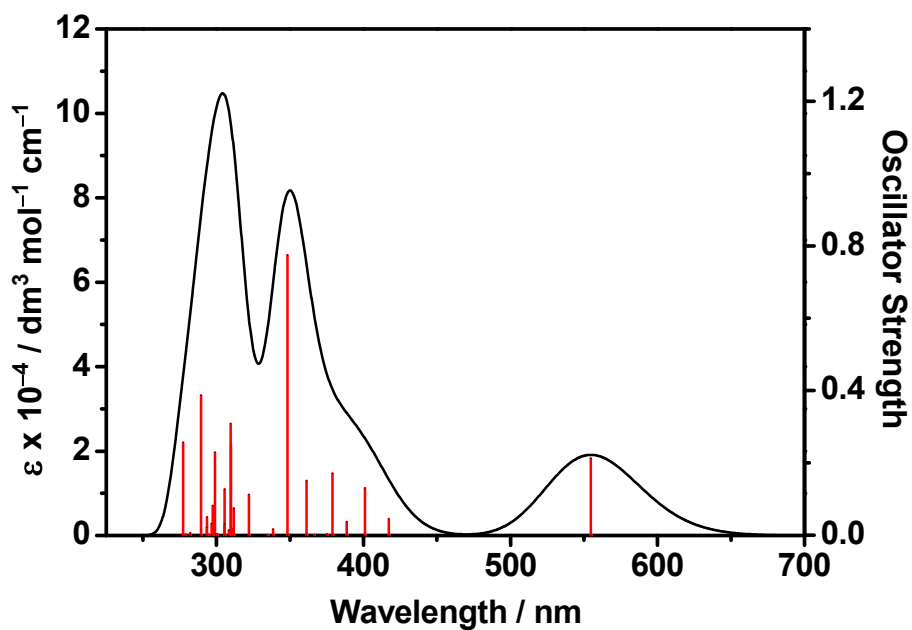

**Figure S17.** Simulated UV-vis spectrum of **3** computed by TDDFT/CPCM using toluene as the solvent.



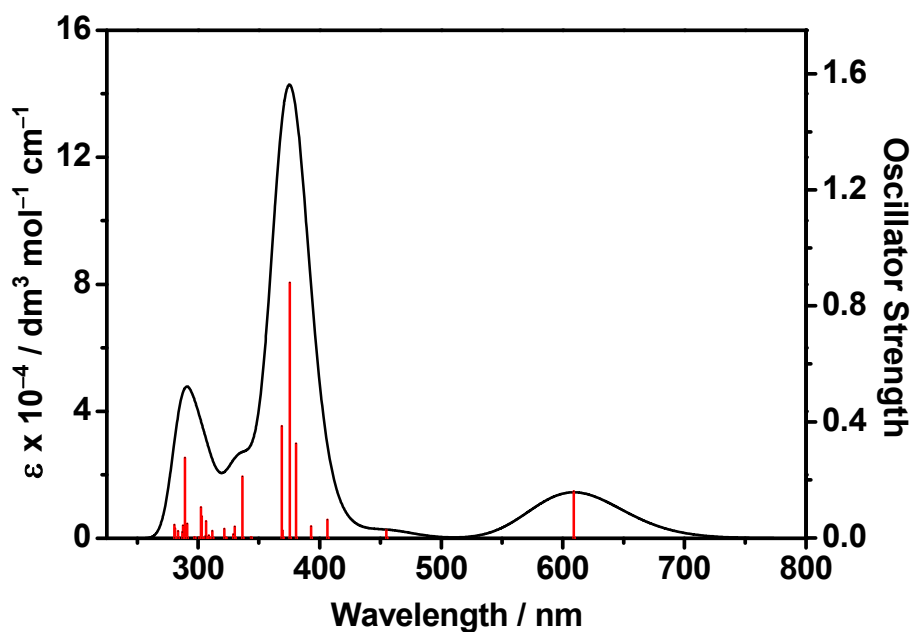

**Figure S18.** Simulated UV-vis spectrum of **5** computed by TDDFT/CPCM using toluene as the solvent.

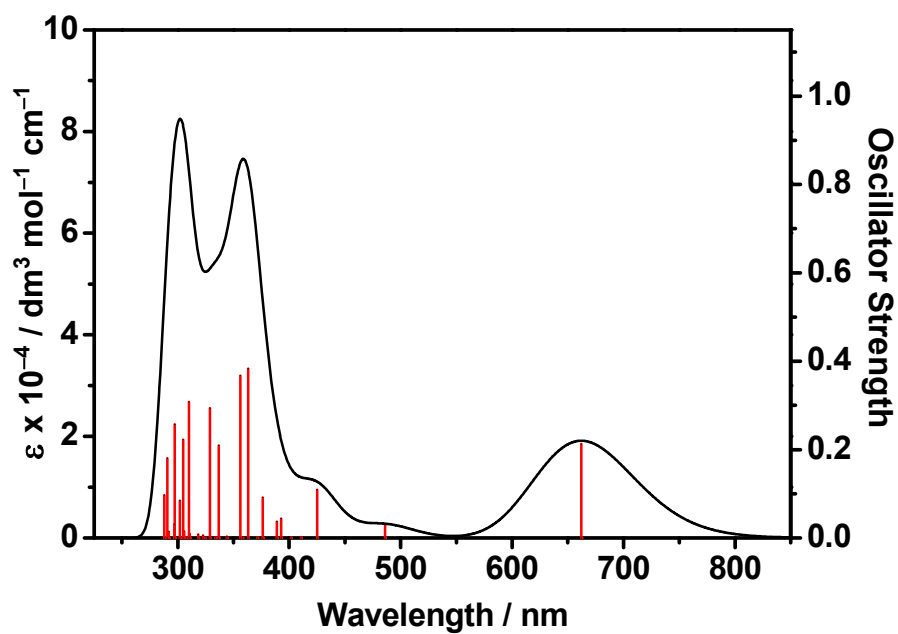

**Figure S19.** Simulated UV-vis spectrum of **6** computed by TDDFT/CPCM using toluene as the solvent.

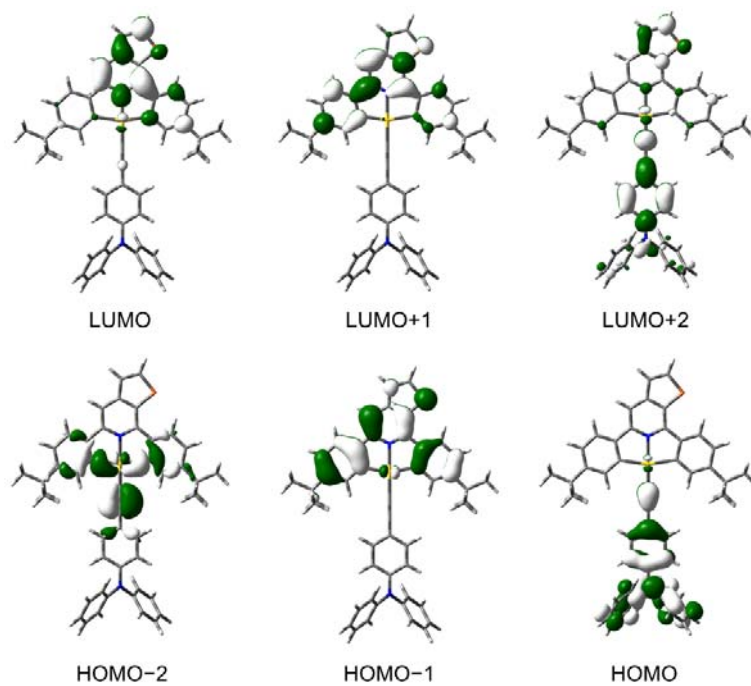

**Figure S20.** Spatial plots (isovalue = 0.03) of selected molecular orbitals of **1** at the optimized ground-state geometry.

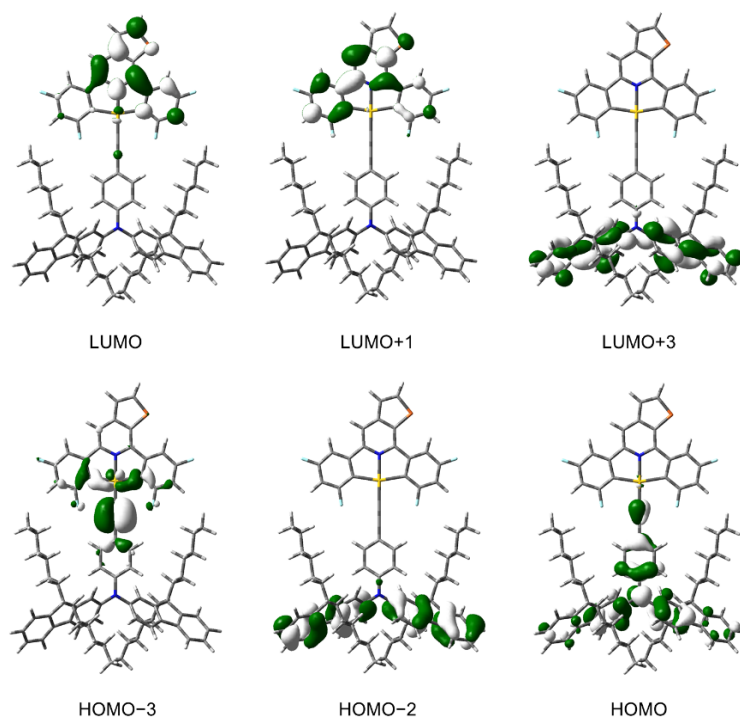

**Figure S21.** Spatial plots (isovalue = 0.03) of selected molecular orbitals of **5** at the optimized ground-state geometry.

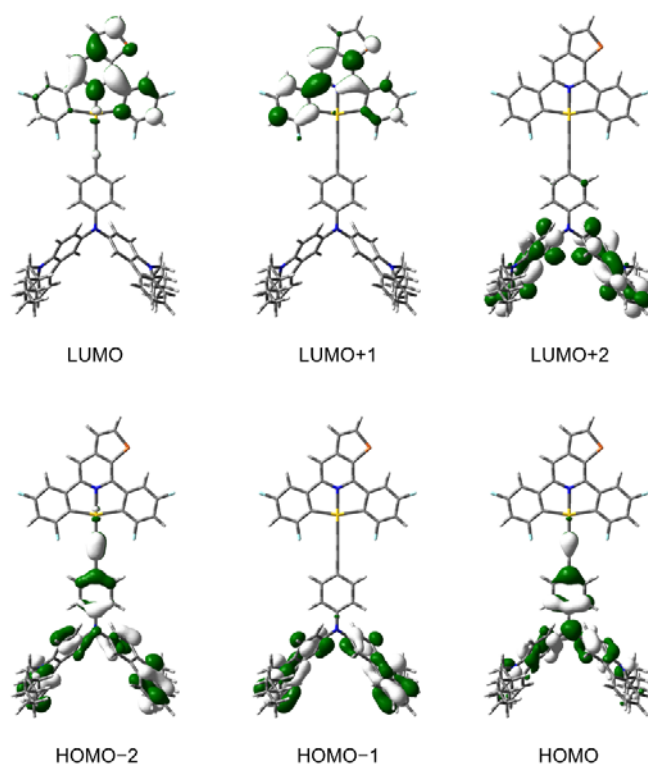

**Figure S22.** Spatial plots (isovalue = 0.03) of selected molecular orbitals of **6** at the optimized ground-state geometry.

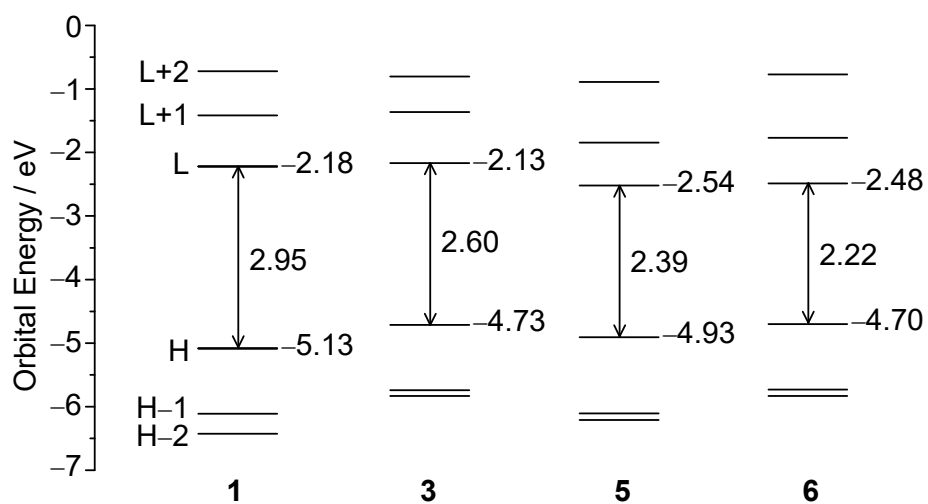

**Figure S23.** Orbital energy diagram of **1**, **3**, **5** and **6**.

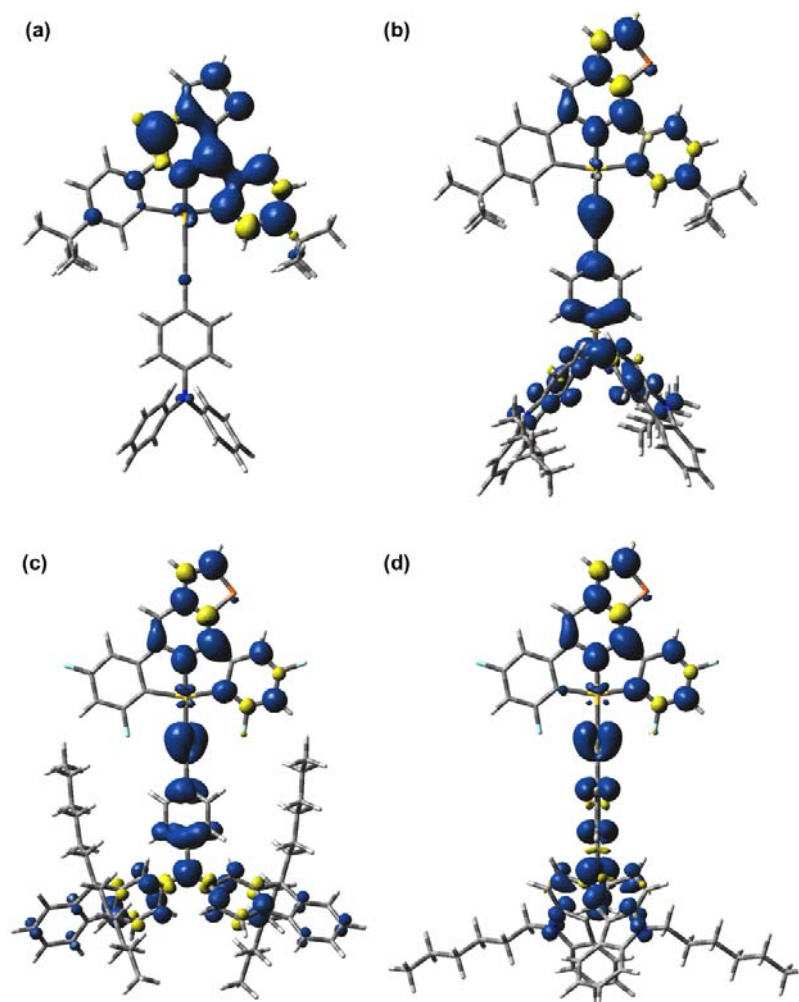

**Figure S24.** Plots of spin density (isovalue = 0.002) of the  $T_1$  states of (a) **1**, (b) **3**, (c) **5** and (d) **6**.

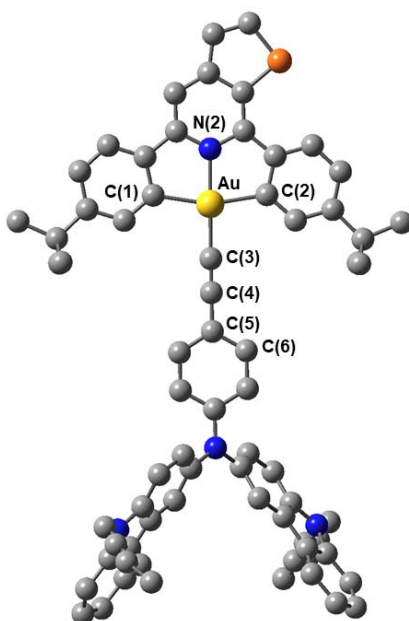

|           |                |                   |              |
|-----------|----------------|-------------------|--------------|
| Au-N(1)   | 1.995 (0.003)  | N(1)-Au-C(1)      | 81.1 (-0.1)  |
| Au-C(1)   | 2.091 (0.001)  | N(1)-Au-C(2)      | 80.9 (0.0)   |
| Au-C(2)   | 2.080 (0.000)  | N(1)-Au-C(3)      | 179.6 (+0.1) |
| Au-C(3)   | 1.975 (0.009)  | C(2)-Au-C(5)-C(6) | 3.0 (-2.5)   |
| C(3)-C(4) | 1.231 (-0.005) |                   |              |

**Figure S25.** Selected structural parameters of the optimized T<sub>1</sub> geometry of **3**. The bond lengths and angles are in Å and degrees, respectively. The changes in bond lengths and angles from the optimized T<sub>1</sub> to S<sub>1</sub> geometries are shown in the brackets, in which, the positive and negative values indicate bond elongation and contraction, respectively, and the differences in bond angles. All hydrogen atoms are omitted for clarity.

**Table S5.** Relative energies of the optimized T<sub>1</sub> and S<sub>1</sub> states of **1**, **3**, **5** and **6**.

| Complex  | $\Delta E(\text{T}_1\text{-S}_0) / \text{cm}^{-1} (\lambda / \text{nm})^a$ | $\Delta E(\text{S}_1\text{-S}_0) / \text{cm}^{-1} (\lambda / \text{nm})^b$ |
|----------|----------------------------------------------------------------------------|----------------------------------------------------------------------------|
| <b>1</b> | 19307 (518)                                                                | ---                                                                        |
| <b>3</b> | 15854 (631)                                                                | 17382 (575)                                                                |
| <b>5</b> | 15942 (627)                                                                | 15991 (625)                                                                |
| <b>6</b> | 14206 (704)                                                                | 14305 (699)                                                                |

<sup>a</sup> Energy difference between the T<sub>1</sub> and S<sub>0</sub> states at the corresponding optimized geometry in toluene.

<sup>b</sup> Energy difference between the S<sub>1</sub> and S<sub>0</sub> states at the corresponding optimized geometry in toluene.

**Table S6.** Cartesian coordinates of the optimized ground-state geometry of **1** optimized with PBE0 functional.

|    |    |           |           |           |    |   |           |           |           |
|----|----|-----------|-----------|-----------|----|---|-----------|-----------|-----------|
| 1  | C  | -4.685669 | 1.570570  | 0.107197  | 61 | H | -2.454511 | -6.792311 | -1.407445 |
| 2  | C  | -6.063357 | 1.697853  | 0.107778  | 62 | C | -0.275793 | -5.341103 | 0.861179  |
| 3  | C  | -6.844196 | 0.538466  | 0.012555  | 63 | H | 0.273719  | -4.401320 | 0.969676  |
| 4  | C  | -6.223231 | -0.733446 | -0.082162 | 64 | H | -0.884015 | -5.481436 | 1.760806  |
| 5  | C  | -4.823106 | -0.834692 | -0.080251 | 65 | H | 0.456674  | -6.154696 | 0.814510  |
| 6  | H  | -8.934332 | 1.296292  | 0.057551  | 66 | N | 6.689958  | -0.244346 | -0.011606 |
| 7  | H  | -6.534137 | 2.671123  | 0.180240  | 67 | C | 5.283415  | -0.172687 | -0.000256 |
| 8  | C  | -8.272610 | 0.440783  | -0.004776 | 68 | C | 7.354989  | -1.283852 | 0.678595  |
| 9  | C  | -8.700553 | -0.842075 | -0.107942 | 69 | C | 8.458256  | -1.925130 | 0.101278  |
| 10 | H  | -9.722815 | -1.196693 | -0.142691 | 70 | C | 6.922896  | -1.683699 | 1.949602  |
| 11 | C  | -3.687603 | 2.647028  | 0.197775  | 71 | C | 9.117324  | -2.938761 | 0.787903  |
| 12 | C  | -2.319866 | 2.266670  | 0.178790  | 72 | H | 8.793854  | -1.622884 | -0.885903 |
| 13 | C  | -4.025870 | 3.996611  | 0.299616  | 73 | C | 7.577404  | -2.710800 | 2.620369  |
| 14 | C  | -1.351023 | 3.257019  | 0.263697  | 74 | H | 6.072965  | -1.185116 | 2.405242  |
| 15 | C  | -3.031177 | 4.966575  | 0.383141  | 75 | C | 8.680138  | -3.342052 | 2.048079  |
| 16 | H  | -5.066885 | 4.309626  | 0.315226  | 76 | H | 9.971326  | -3.425873 | 0.325603  |
| 17 | C  | -1.676069 | 4.621046  | 0.367500  | 77 | H | 7.229349  | -3.008574 | 3.605492  |
| 18 | H  | -0.307304 | 2.953999  | 0.248272  | 78 | H | 9.192970  | -4.138811 | 2.578204  |
| 19 | H  | -3.329660 | 6.006202  | 0.461545  | 79 | C | 7.444553  | 0.719686  | -0.719255 |
| 20 | C  | -3.961067 | -2.023001 | -0.166443 | 80 | C | 8.618942  | 1.245625  | -0.166186 |
| 21 | C  | -2.556763 | -1.790283 | -0.140087 | 81 | C | 7.030989  | 1.158560  | -1.983510 |
| 22 | C  | -4.431274 | -3.334262 | -0.269712 | 82 | C | 9.364881  | 2.184584  | -0.869929 |
| 23 | C  | -1.696813 | -2.875054 | -0.218163 | 83 | H | 8.941031  | 0.912895  | 0.815699  |
| 24 | C  | -3.541233 | -4.401696 | -0.345688 | 84 | C | 7.774001  | 2.111442  | -2.671340 |
| 25 | H  | -5.493263 | -3.556031 | -0.293018 | 85 | H | 6.125584  | 0.748842  | -2.420454 |
| 26 | C  | -2.158931 | -4.199374 | -0.321694 | 86 | C | 8.946695  | 2.627534  | -2.123238 |
| 27 | H  | -0.627785 | -2.680180 | -0.197184 | 87 | H | 10.273278 | 2.582602  | -0.426404 |
| 28 | H  | -3.947368 | -5.403923 | -0.424466 | 88 | H | 7.439012  | 2.440963  | -3.650868 |
| 29 | Au | -2.130591 | 0.219929  | 0.019701  | 89 | H | 9.528014  | 3.366210  | -2.666633 |
| 30 | C  | 2.459248  | -0.026893 | 0.016562  | 90 | S | -7.415920 | -1.996096 | -0.189274 |
| 31 | C  | 3.122348  | -1.265502 | -0.034299 | 91 | C | -0.184682 | 0.114976  | 0.022956  |
| 32 | C  | 3.246951  | 1.136836  | 0.060454  | 92 | C | 1.036551  | 0.047604  | 0.021248  |
| 33 | C  | 4.505894  | -1.338927 | -0.049944 |    |   |           |           |           |
| 34 | H  | 2.535154  | -2.178021 | -0.077693 |    |   |           |           |           |
| 35 | C  | 4.630656  | 1.067300  | 0.059732  |    |   |           |           |           |
| 36 | H  | 2.757328  | 2.104911  | 0.109972  |    |   |           |           |           |
| 37 | H  | 4.995980  | -2.305836 | -0.103818 |    |   |           |           |           |
| 38 | H  | 5.218416  | 1.978522  | 0.107000  |    |   |           |           |           |
| 39 | N  | -4.141764 | 0.326012  | 0.014561  |    |   |           |           |           |
| 40 | C  | -0.556701 | 5.659823  | 0.458160  |    |   |           |           |           |
| 41 | C  | 0.322631  | 5.568257  | -0.800299 |    |   |           |           |           |
| 42 | H  | 0.772983  | 4.577193  | -0.909892 |    |   |           |           |           |
| 43 | H  | -0.262925 | 5.773352  | -1.702574 |    |   |           |           |           |
| 44 | H  | 1.134809  | 6.301941  | -0.746767 |    |   |           |           |           |
| 45 | C  | -1.094659 | 7.089259  | 0.565695  |    |   |           |           |           |
| 46 | H  | -1.708423 | 7.227094  | 1.462223  |    |   |           |           |           |
| 47 | H  | -0.256848 | 7.791240  | 0.627667  |    |   |           |           |           |
| 48 | H  | -1.693727 | 7.365914  | -0.308409 |    |   |           |           |           |
| 49 | C  | 0.301864  | 5.372087  | 1.701261  |    |   |           |           |           |
| 50 | H  | -0.298585 | 5.435729  | 2.614731  |    |   |           |           |           |
| 51 | H  | 0.750915  | 4.375168  | 1.662845  |    |   |           |           |           |
| 52 | H  | 1.114417  | 6.103546  | 1.775733  |    |   |           |           |           |
| 53 | C  | -1.152912 | -5.347951 | -0.402237 |    |   |           |           |           |
| 54 | C  | -0.263124 | -5.154209 | -1.641722 |    |   |           |           |           |
| 55 | H  | -0.862160 | -5.159298 | -2.558274 |    |   |           |           |           |
| 56 | H  | 0.286359  | -4.208929 | -1.604026 |    |   |           |           |           |
| 57 | H  | 0.469717  | -5.966027 | -1.708890 |    |   |           |           |           |
| 58 | C  | -1.835132 | -6.714514 | -0.507603 |    |   |           |           |           |
| 59 | H  | -1.073892 | -7.499356 | -0.561738 |    |   |           |           |           |
| 60 | H  | -2.464451 | -6.923917 | 0.363908  |    |   |           |           |           |

**Table S7.** Cartesian coordinates of the optimized ground-state geometry of **3** optimized with PBE0 functional.

|    |    |            |           |           |     |   |            |           |           |
|----|----|------------|-----------|-----------|-----|---|------------|-----------|-----------|
| 1  | C  | -8.091035  | -1.267543 | -0.821488 | 61  | H | -5.617647  | 5.140299  | 4.657363  |
| 2  | C  | -9.471875  | -1.343778 | -0.864650 | 62  | C | -3.482747  | 4.974478  | 1.934402  |
| 3  | C  | -10.218887 | -0.370186 | -0.188590 | 63  | H | -2.961626  | 4.203391  | 1.359294  |
| 4  | C  | -9.561494  | 0.666829  | 0.521739  | 64  | H | -4.086823  | 5.564291  | 1.237111  |
| 5  | C  | -8.158967  | 0.720807  | 0.550013  | 65  | H | -2.726249  | 5.634710  | 2.373099  |
| 6  | H  | -12.329956 | -0.952183 | -0.575314 | 66  | N | 3.330101   | 0.016813  | -0.009777 |
| 7  | H  | -9.970623  | -2.137531 | -1.408113 | 67  | C | 1.931804   | -0.019218 | -0.023563 |
| 8  | C  | -11.643957 | -0.259592 | -0.102646 | 68  | S | -10.717298 | 1.734390  | 1.265360  |
| 9  | C  | -12.034805 | 0.808483  | 0.636191  | 69  | C | -3.550126  | -0.161285 | -0.084925 |
| 10 | H  | -13.046384 | 1.122812  | 0.859643  | 70  | C | -2.327116  | -0.129485 | -0.070133 |
| 11 | C  | -7.124289  | -2.176930 | -1.455300 | 71  | C | 4.023336   | 1.251874  | 0.080481  |
| 12 | C  | -5.746101  | -1.891780 | -1.267447 | 72  | C | 3.666687   | 2.320177  | -0.767150 |
| 13 | C  | -7.501350  | -3.283395 | -2.216840 | 73  | C | 5.074081   | 1.400993  | 0.984046  |
| 14 | C  | -4.806189  | -2.729204 | -1.852362 | 74  | C | 4.322890   | 3.540985  | -0.715372 |
| 15 | C  | -6.534994  | -4.104682 | -2.790248 | 75  | H | 2.855910   | 2.175936  | -1.474529 |
| 16 | H  | -8.550994  | -3.519631 | -2.373261 | 76  | C | 5.764631   | 2.611863  | 1.031663  |
| 17 | C  | -5.170433  | -3.847915 | -2.622175 | 77  | H | 5.349444   | 0.573835  | 1.631618  |
| 18 | H  | -3.754281  | -2.500499 | -1.702049 | 78  | C | 5.375434   | 3.682533  | 0.190727  |
| 19 | H  | -6.863176  | -4.956305 | -3.376036 | 79  | H | 4.030010   | 4.347151  | -1.380856 |
| 20 | C  | -7.262914  | 1.683119  | 1.208625  | 80  | C | 6.874536   | 3.094207  | 1.818164  |
| 21 | C  | -5.865902  | 1.460608  | 1.047497  | 81  | C | 7.101180   | 4.433611  | 1.413132  |
| 22 | C  | -7.694866  | 2.775633  | 1.964486  | 82  | C | 7.680195   | 2.525508  | 2.807412  |
| 23 | C  | -4.974850  | 2.337304  | 1.647397  | 83  | C | 8.122941   | 5.201807  | 1.975231  |
| 24 | C  | -6.774164  | 3.637450  | 2.553488  | 84  | C | 8.694174   | 3.287974  | 3.372380  |
| 25 | H  | -8.749978  | 2.981742  | 2.112362  | 85  | H | 7.516603   | 1.500059  | 3.127494  |
| 26 | C  | -5.398247  | 3.440431  | 2.410010  | 86  | C | 8.909349   | 4.611080  | 2.956967  |
| 27 | H  | -3.912025  | 2.152854  | 1.514780  | 87  | H | 8.305954   | 6.224198  | 1.659062  |
| 28 | H  | -7.150983  | 4.473555  | 3.131960  | 88  | H | 9.329615   | 2.858239  | 4.140802  |
| 29 | Au | -5.497696  | -0.207152 | -0.105696 | 89  | H | 9.710746   | 5.188137  | 3.409634  |
| 30 | C  | -0.903419  | -0.093053 | -0.053851 | 90  | C | 4.085270   | -1.183070 | -0.081399 |
| 31 | C  | -0.207669  | 0.939957  | 0.598708  | 91  | C | 3.775693   | -2.258464 | 0.775436  |
| 32 | C  | -0.141148  | -1.088589 | -0.690141 | 92  | C | 5.149041   | -1.288595 | -0.975591 |
| 33 | C  | 1.176469   | 0.976412  | 0.620199  | 93  | C | 4.494200   | -3.444425 | 0.743853  |
| 34 | H  | -0.771317  | 1.717031  | 1.107035  | 94  | H | 2.952038   | -2.147595 | 1.473940  |
| 35 | C  | 1.243139   | -1.052987 | -0.681815 | 95  | C | 5.900801   | -2.463063 | -1.003658 |
| 36 | H  | -0.652654  | -1.893721 | -1.209773 | 96  | H | 5.386912   | -0.455580 | -1.630505 |
| 37 | H  | 1.686350   | 1.778586  | 1.143570  | 97  | C | 5.560568   | -3.541981 | -0.151893 |
| 38 | H  | 1.805281   | -1.827370 | -1.193408 | 98  | H | 4.237221   | -4.256879 | 1.416443  |
| 39 | N  | -7.511482  | -0.251664 | -0.124845 | 99  | C | 7.040713   | -2.896840 | -1.775339 |
| 40 | C  | -4.081409  | -4.728205 | -3.238188 | 100 | C | 7.333781   | -4.217038 | -1.350559 |
| 41 | C  | -3.196760  | -5.299227 | -2.117215 | 101 | C | 7.823849   | -2.299446 | -2.765756 |
| 42 | H  | -2.718125  | -4.506900 | -1.534062 | 102 | C | 8.399650   | -4.937463 | -1.893747 |
| 43 | H  | -3.785760  | -5.914623 | -1.429140 | 103 | C | 8.881543   | -3.014640 | -3.312063 |
| 44 | H  | -2.405829  | -5.926333 | -2.543822 | 104 | H | 7.609273   | -1.288366 | -3.101051 |
| 45 | C  | -4.660273  | -5.899125 | -4.037030 | 105 | C | 9.162530   | -4.318919 | -2.876910 |
| 46 | H  | -5.279017  | -5.555662 | -4.872895 | 106 | H | 8.633387   | -5.944635 | -1.562508 |
| 47 | H  | -3.843016  | -6.496178 | -4.454405 | 107 | H | 9.500126   | -2.562107 | -4.081148 |
| 48 | H  | -5.265859  | -6.560922 | -3.408688 | 108 | H | 9.997192   | -4.858747 | -3.315156 |
| 49 | C  | -3.217942  | -3.877583 | -4.184834 | 109 | N | 6.179684   | 4.777890  | 0.442798  |
| 50 | H  | -3.822304  | -3.461529 | -4.997663 | 110 | N | 6.422868   | -4.596962 | -0.383392 |
| 51 | H  | -2.740380  | -3.044557 | -3.660506 | 111 | C | 6.127511   | 6.038707  | -0.262163 |
| 52 | H  | -2.426884  | -4.492592 | -4.628509 | 112 | H | 5.081047   | 6.241558  | -0.516382 |
| 53 | C  | -4.358967  | 4.366483  | 3.042630  | 113 | H | 6.432297   | 6.828862  | 0.432998  |
| 54 | C  | -3.474866  | 3.552646  | 4.002637  | 114 | C | 6.440269   | -5.843987 | 0.347616  |
| 55 | H  | -4.073371  | 3.110493  | 4.805916  | 115 | H | 5.406479   | -6.101397 | 0.603906  |
| 56 | H  | -2.952996  | 2.741608  | 3.486152  | 116 | H | 6.792395   | -6.629677 | -0.329986 |
| 57 | H  | -2.718699  | 4.201507  | 4.458538  | 117 | C | 7.304718   | -5.799713 | 1.605643  |
| 58 | C  | -5.000870  | 5.510747  | 3.831664  | 118 | H | 8.330029   | -5.528415 | 1.323260  |
| 59 | H  | -4.217078  | 6.142183  | 4.262239  | 119 | H | 6.939533   | -4.998069 | 2.260342  |
| 60 | H  | -5.623976  | 6.146255  | 3.193437  | 120 | C | 7.304810   | -7.126303 | 2.357018  |



|     |   |           |           |           |
|-----|---|-----------|-----------|-----------|
| 121 | H | 6.273189  | -7.394195 | 2.626653  |
| 122 | H | 7.661079  | -7.924426 | 1.690047  |
| 123 | C | 8.164314  | -7.101686 | 3.616825  |
| 124 | H | 9.195803  | -6.833276 | 3.347780  |
| 125 | H | 7.808370  | -6.303910 | 4.284080  |
| 126 | C | 8.169348  | -8.426367 | 4.373449  |
| 127 | H | 7.137984  | -8.693210 | 4.640961  |
| 128 | H | 8.524341  | -9.222477 | 3.705088  |
| 129 | C | 9.030591  | -8.391866 | 5.629826  |
| 130 | H | 8.677125  | -7.626710 | 6.329988  |
| 131 | H | 9.017320  | -9.352978 | 6.153277  |
| 132 | H | 10.073556 | -8.159316 | 5.387358  |
| 133 | C | 6.995107  | 6.072676  | -1.518381 |
| 134 | H | 8.034352  | 5.856337  | -1.239593 |
| 135 | H | 6.678717  | 5.265895  | -2.191884 |
| 136 | C | 6.916548  | 7.413936  | -2.238876 |
| 137 | H | 5.870629  | 7.626030  | -2.503111 |
| 138 | H | 7.224606  | 8.215986  | -1.552871 |
| 139 | C | 7.775257  | 7.471307  | -3.498203 |
| 140 | H | 8.821396  | 7.259809  | -3.235058 |
| 141 | H | 7.467876  | 6.669682  | -4.184688 |
| 142 | C | 7.698851  | 8.811790  | -4.222366 |
| 143 | H | 6.652835  | 9.021604  | -4.483692 |
| 144 | H | 8.005253  | 9.611531  | -3.534582 |
| 145 | C | 8.559237  | 8.860774  | -5.478874 |
| 146 | H | 8.252721  | 8.092508  | -6.197514 |
| 147 | H | 8.486271  | 9.831655  | -5.978851 |
| 148 | H | 9.614823  | 8.687050  | -5.241769 |

**Table S8.** Cartesian coordinates of the optimized ground-state geometry of **5** optimized with PBE0 functional.

|    |    |            |           |           |     |   |           |           |           |
|----|----|------------|-----------|-----------|-----|---|-----------|-----------|-----------|
| 1  | C  | -7.698488  | -1.430730 | -0.651183 | 61  | C | 6.881367  | 5.875088  | 1.402430  |
| 2  | C  | -9.076299  | -1.531438 | -0.696241 | 62  | C | 5.124831  | 7.329931  | -0.249996 |
| 3  | C  | -9.842863  | -0.480455 | -0.179524 | 63  | H | 2.333558  | 6.335675  | -0.987238 |
| 4  | C  | -9.203315  | 0.658268  | 0.376365  | 64  | H | 1.950251  | 4.630461  | -1.129416 |
| 5  | C  | -7.801847  | 0.727822  | 0.406387  | 65  | C | 2.153860  | 5.305264  | 0.901285  |
| 6  | H  | -11.940405 | -1.143645 | -0.499322 | 66  | H | 3.950543  | 6.073336  | -2.750430 |
| 7  | H  | -9.561761  | -2.401546 | -1.121085 | 67  | H | 3.529813  | 4.372050  | -2.859958 |
| 8  | C  | -11.268958 | -0.379617 | -0.126840 | 68  | C | 5.648381  | 4.756389  | -2.907033 |
| 9  | C  | -11.680548 | 0.780616  | 0.441822  | 69  | C | 6.984068  | 7.261858  | 1.306300  |
| 10 | H  | -12.697764 | 1.112592  | 0.606434  | 70  | H | 7.561240  | 5.317559  | 2.041323  |
| 11 | C  | -6.723126  | -2.420692 | -1.138450 | 71  | C | 6.113622  | 7.984879  | 0.488894  |
| 12 | C  | -5.350404  | -2.096359 | -0.984051 | 72  | H | 4.451946  | 7.899982  | -0.886456 |
| 13 | C  | -7.142007  | -3.620139 | -1.721711 | 73  | H | 2.510750  | 4.370648  | 1.353320  |
| 14 | C  | -4.445314  | -3.043897 | -1.446086 | 74  | H | 2.644712  | 6.119432  | 1.450131  |
| 15 | C  | -6.176213  | -4.510209 | -2.156714 | 75  | C | 0.640528  | 5.393925  | 1.079933  |
| 16 | H  | -8.187346  | -3.878920 | -1.845256 | 76  | H | 6.366227  | 5.454469  | -2.457306 |
| 17 | C  | -4.822683  | -4.248676 | -2.030759 | 77  | H | 5.942014  | 3.753503  | -2.570460 |
| 18 | C  | -6.924517  | 1.793664  | 0.923644  | 78  | C | 5.755876  | 4.830762  | -4.427366 |
| 19 | C  | -5.525182  | 1.566769  | 0.804055  | 79  | H | 7.748333  | 7.785544  | 1.873728  |
| 20 | C  | -7.428615  | 2.965236  | 1.498708  | 80  | H | 6.206099  | 9.065534  | 0.427062  |
| 21 | C  | -4.697595  | 2.570850  | 1.286826  | 81  | H | 0.268010  | 6.325172  | 0.629294  |
| 22 | C  | -6.534379  | 3.917445  | 1.956383  | 82  | H | 0.167390  | 4.575396  | 0.518199  |
| 23 | H  | -8.485012  | 3.172607  | 1.607793  | 83  | C | 0.191539  | 5.320838  | 2.535598  |
| 24 | C  | -5.165459  | 3.748094  | 1.862837  | 84  | H | 5.457794  | 5.833701  | -4.765747 |
| 25 | Au | -5.112091  | -0.251465 | -0.085076 | 85  | H | 5.035995  | 4.133263  | -4.879437 |
| 26 | C  | -0.528264  | -0.085898 | -0.038346 | 86  | C | 7.154397  | 4.519179  | -4.950236 |
| 27 | C  | 0.154929   | 0.805571  | 0.807021  | 87  | H | 0.598497  | 4.408149  | 2.994785  |
| 28 | C  | 0.234183   | -0.923672 | -0.870877 | 88  | H | 0.626004  | 6.160583  | 3.096755  |
| 29 | C  | 1.539427   | 0.849676  | 0.829070  | 89  | C | -1.325243 | 5.330615  | 2.704133  |
| 30 | H  | -0.418663  | 1.454647  | 1.461889  | 90  | H | 7.875046  | 5.215926  | -4.498445 |
| 31 | C  | 1.618277   | -0.864369 | -0.868678 | 91  | H | 7.453377  | 3.516014  | -4.613767 |
| 32 | H  | -0.277988  | -1.613358 | -1.535074 | 92  | C | 7.266830  | 4.594300  | -6.469790 |
| 33 | H  | 2.049227   | 1.531285  | 1.502680  | 93  | H | -1.734509 | 6.234464  | 2.231929  |
| 34 | H  | 2.189275   | -1.505774 | -1.532616 | 94  | H | -1.754482 | 4.479963  | 2.157207  |
| 35 | N  | -7.132861  | -0.320941 | -0.109249 | 95  | C | -1.762349 | 5.273488  | 4.163101  |
| 36 | N  | 3.702108   | 0.071920  | -0.001718 | 96  | H | 6.967028  | 5.596682  | -6.804544 |
| 37 | C  | 2.293266   | 0.019492  | -0.013715 | 97  | H | 6.546593  | 3.897615  | -6.919833 |
| 38 | S  | -10.382118 | 1.805885  | 0.940597  | 98  | C | 8.667563  | 4.282546  | -6.982096 |
| 39 | C  | -3.168360  | -0.182860 | -0.063533 | 99  | H | -1.375901 | 6.130857  | 4.725561  |
| 40 | C  | -1.949463  | -0.138403 | -0.051564 | 100 | H | -2.853088 | 5.278589  | 4.261275  |
| 41 | H  | -4.078960  | -4.958328 | -2.374865 | 101 | H | -1.390877 | 4.365164  | 4.650543  |
| 42 | H  | -4.478254  | 4.504645  | 2.224235  | 102 | H | 8.979244  | 3.273447  | -6.689853 |
| 43 | F  | -7.013298  | 5.039592  | 2.506610  | 103 | H | 8.720843  | 4.343741  | -8.073733 |
| 44 | F  | -3.367282  | 2.442619  | 1.212491  | 104 | H | 9.402742  | 4.984751  | -6.573130 |
| 45 | F  | -6.561859  | -5.663596 | -2.717061 | 105 | C | 4.445068  | -1.121187 | -0.134614 |
| 46 | F  | -3.128050  | -2.828341 | -1.340559 | 106 | C | 5.576889  | -1.167524 | -0.962916 |
| 47 | C  | 4.352563   | 1.315370  | 0.151755  | 107 | C | 4.027455  | -2.279238 | 0.539806  |
| 48 | C  | 5.461671   | 1.439909  | 1.002461  | 108 | C | 6.268941  | -2.358887 | -1.153252 |
| 49 | C  | 3.863150   | 2.444083  | -0.524254 | 109 | H | 5.892993  | -0.264061 | -1.475292 |
| 50 | C  | 6.058756   | 2.678172  | 1.213881  | 110 | C | 4.705937  | -3.466312 | 0.332101  |
| 51 | H  | 5.834408   | 0.558904  | 1.515835  | 111 | H | 3.160276  | -2.232701 | 1.192786  |
| 52 | C  | 4.446473   | 3.676957  | -0.295443 | 112 | C | 5.819973  | -3.518586 | -0.522925 |
| 53 | H  | 3.014658   | 2.338057  | -1.194596 | 113 | H | 7.131060  | -2.379753 | -1.814594 |
| 54 | C  | 5.536347   | 3.805987  | 0.582297  | 114 | C | 4.395407  | -4.835380 | 0.911653  |
| 55 | H  | 6.903678   | 2.758231  | 1.892652  | 115 | C | 6.284033  | -4.904426 | -0.589340 |
| 56 | C  | 4.044228   | 5.023698  | -0.870951 | 116 | C | 5.447982  | -5.690234 | 0.225323  |
| 57 | C  | 5.892556   | 5.222348  | 0.668136  | 117 | C | 2.951240  | -5.272622 | 0.582514  |
| 58 | C  | 5.015392   | 5.949695  | -0.157510 | 118 | C | 4.568575  | -4.856404 | 2.449503  |
| 59 | C  | 2.564958   | 5.347274  | -0.567102 | 119 | C | 7.334408  | -5.485341 | -1.297983 |
| 60 | C  | 4.244033   | 5.072243  | -2.404844 | 120 | C | 5.659878  | -7.057468 | 0.332048  |

|     |   |           |           |           |
|-----|---|-----------|-----------|-----------|
| 121 | H | 2.787131  | -6.272555 | 1.007012  |
| 122 | H | 2.272892  | -4.600347 | 1.126342  |
| 123 | C | 2.567970  | -5.272880 | -0.893986 |
| 124 | H | 4.346025  | -5.874215 | 2.799143  |
| 125 | H | 3.794184  | -4.209356 | 2.884444  |
| 126 | C | 5.934687  | -4.429193 | 2.974351  |
| 127 | C | 7.540142  | -6.859514 | -1.187478 |
| 128 | H | 7.982850  | -4.882310 | -1.928173 |
| 129 | C | 6.710461  | -7.640661 | -0.381256 |
| 130 | H | 5.019359  | -7.672461 | 0.960019  |
| 131 | H | 2.861978  | -4.317124 | -1.347078 |
| 132 | H | 3.130555  | -6.051199 | -1.425729 |
| 133 | C | 1.069829  | -5.477839 | -1.102447 |
| 134 | H | 6.712430  | -5.074327 | 2.545643  |
| 135 | H | 6.157078  | -3.410016 | 2.632176  |
| 136 | C | 6.018409  | -4.480012 | 4.497137  |
| 137 | H | 8.353451  | -7.327696 | -1.734885 |
| 138 | H | 6.883413  | -8.710673 | -0.308076 |
| 139 | H | 0.759703  | -6.431318 | -0.651062 |
| 140 | H | 0.524097  | -4.693483 | -0.558086 |
| 141 | C | 0.647797  | -5.450159 | -2.567720 |
| 142 | H | 5.795320  | -5.500242 | 4.841463  |
| 143 | H | 5.236366  | -3.838157 | 4.927884  |
| 144 | C | 7.377085  | -4.051351 | 5.041831  |
| 145 | H | 0.994811  | -4.513014 | -3.026868 |
| 146 | H | 1.156277  | -6.259095 | -3.111716 |
| 147 | C | -0.859968 | -5.575505 | -2.767986 |
| 148 | H | 8.160060  | -4.692351 | 4.611752  |
| 149 | H | 7.600680  | -3.030943 | 4.698746  |
| 150 | C | 7.466107  | -4.100869 | 6.563970  |
| 151 | H | -1.210542 | -6.503324 | -2.295090 |
| 152 | H | -1.363768 | -4.754765 | -2.239335 |
| 153 | C | -1.268079 | -5.564516 | -4.236383 |
| 154 | H | 7.243005  | -5.120815 | 6.905478  |
| 155 | H | 6.682795  | -3.460828 | 6.992249  |
| 156 | C | 8.826547  | -3.669635 | 7.097824  |
| 157 | H | -0.806206 | -6.395428 | -4.781426 |
| 158 | H | -2.352960 | -5.652448 | -4.357398 |
| 159 | H | -0.955184 | -4.635256 | -4.725510 |
| 160 | H | 9.059952  | -2.641529 | 6.798913  |
| 161 | H | 8.863773  | -3.714521 | 8.190918  |
| 162 | H | 9.624516  | -4.313380 | 6.710950  |

**Table S9.** Cartesian coordinates of the optimized ground-state geometry of **6** optimized with PBE0 functional.

|    |    |           |           |           |     |   |           |            |           |
|----|----|-----------|-----------|-----------|-----|---|-----------|------------|-----------|
| 1  | C  | 8.207107  | -1.216223 | 0.876897  | 63  | C | -4.340082 | -3.518749  | -0.343814 |
| 2  | C  | 9.585556  | -1.310573 | 0.917361  | 64  | H | -2.799054 | -2.302156  | -1.202565 |
| 3  | C  | 10.342925 | -0.377899 | 0.199238  | 65  | C | -5.773709 | -2.354123  | 1.263198  |
| 4  | C  | 9.693577  | 0.637492  | -0.550177 | 66  | H | -5.280979 | -0.284005  | 1.660598  |
| 5  | C  | 8.291706  | 0.704145  | -0.569710 | 67  | C | -5.415760 | -3.521454  | 0.546108  |
| 6  | H  | 12.445728 | -0.976047 | 0.601530  | 68  | H | -4.069386 | -4.401079  | -0.915421 |
| 7  | H  | 10.078053 | -2.087449 | 1.489429  | 69  | C | -6.919226 | -2.705350  | 2.067863  |
| 8  | C  | 11.767950 | -0.293584 | 0.103346  | 70  | C | -7.197305 | -4.068600  | 1.796640  |
| 9  | C  | 12.169429 | 0.736809  | -0.681489 | 71  | C | -7.718126 | -2.003841  | 2.973746  |
| 10 | H  | 13.183540 | 1.028146  | -0.923872 | 72  | C | -8.263522 | -4.730500  | 2.409184  |
| 11 | C  | 7.240517  | -2.094132 | 1.557517  | 73  | C | -8.776201 | -2.660145  | 3.588982  |
| 12 | C  | 5.865720  | -1.803760 | 1.362178  | 74  | H | -7.515266 | -0.958648  | 3.190990  |
| 13 | C  | 7.668774  | -3.159230 | 2.355699  | 75  | C | -9.042096 | -4.008708  | 3.305885  |
| 14 | C  | 4.967662  | -2.641344 | 2.011799  | 76  | H | -8.485773 | -5.771384  | 2.194890  |
| 15 | C  | 6.709776  | -3.946478 | 2.967863  | 77  | H | -9.406872 | -2.126748  | 4.293739  |
| 16 | H  | 8.716126  | -3.390076 | 2.513076  | 78  | H | -9.877348 | -4.501437  | 3.795511  |
| 17 | C  | 5.354370  | -3.710759 | 2.813536  | 79  | N | -6.088366 | 4.677933   | -0.960803 |
| 18 | C  | 7.405343  | 1.653935  | -1.266049 | 80  | N | -6.272723 | -4.550074  | 0.889643  |
| 19 | C  | 6.008714  | 1.451538  | -1.088340 | 81  | C | -6.062658 | 6.002811   | -0.383388 |
| 20 | C  | 7.897733  | 2.697839  | -2.057306 | 82  | H | -5.023569 | 6.242849   | -0.131518 |
| 21 | C  | 5.170753  | 2.344941  | -1.740549 | 83  | H | -6.362332 | 6.716709   | -1.158660 |
| 22 | C  | 6.993825  | 3.544759  | -2.674893 | 84  | C | -6.266557 | -5.876377  | 0.314949  |
| 23 | H  | 8.951941  | 2.883840  | -2.215474 | 85  | H | -6.621203 | -6.578337  | 1.077814  |
| 24 | C  | 5.626727  | 3.392851  | -2.534634 | 86  | H | -5.226319 | -6.150729  | 0.106479  |
| 25 | Au | 5.609637  | -0.165179 | 0.131931  | 87  | C | -6.955183 | 6.148615   | 0.847049  |
| 26 | C  | 1.022571  | -0.057217 | 0.079209  | 88  | H | -7.986148 | 5.892402   | 0.571290  |
| 27 | C  | 0.322884  | 0.897619  | -0.679188 | 89  | H | -6.643370 | 5.415523   | 1.601999  |
| 28 | C  | 0.269042  | -0.985853 | 0.818486  | 90  | C | -6.906772 | 7.554467   | 1.434905  |
| 29 | C  | -1.061387 | 0.921003  | -0.705182 | 91  | H | -7.208900 | 8.282131   | 0.668085  |
| 30 | H  | 0.886046  | 1.618564  | -1.264376 | 92  | H | -5.869275 | 7.804941   | 1.698697  |
| 31 | C  | -1.115294 | -0.960495 | 0.806034  | 93  | C | -7.793424 | 7.721584   | 2.664696  |
| 32 | H  | 0.790330  | -1.725855 | 1.418446  | 94  | H | -8.831065 | 7.471821   | 2.401396  |
| 33 | H  | -1.577240 | 1.658847  | -1.310881 | 95  | H | -7.492319 | 6.993794   | 3.431521  |
| 34 | H  | -1.673400 | -1.679561 | 1.396680  | 96  | C | -7.748259 | 9.126302   | 3.257971  |
| 35 | N  | 7.631616  | -0.226704 | 0.145379  | 97  | H | -8.048051 | 9.852259   | 2.490092  |
| 36 | N  | -3.208241 | 0.015551  | 0.019039  | 98  | H | -6.710810 | 9.374125   | 3.520165  |
| 37 | C  | -1.809587 | -0.007569 | 0.039807  | 99  | C | -8.637246 | 9.283954   | 4.485269  |
| 38 | S  | 10.862098 | 1.653893  | -1.341997 | 100 | H | -8.586647 | 10.299199  | 4.891026  |
| 39 | C  | 3.664851  | -0.111498 | 0.112677  | 101 | H | -9.685162 | 9.074034   | 4.243458  |
| 40 | C  | 2.444676  | -0.084825 | 0.096940  | 102 | H | -8.338304 | 8.592334   | 5.280836  |
| 41 | C  | -3.909618 | 1.228446  | -0.207867 | 103 | C | -7.111646 | -5.995881  | -0.951299 |
| 42 | C  | -3.573332 | 2.381487  | 0.529721  | 104 | H | -8.144308 | -5.705882  | -0.718710 |
| 43 | C  | -4.947743 | 1.273987  | -1.136651 | 105 | H | -6.745228 | -5.274937  | -1.693309 |
| 44 | C  | -4.238742 | 3.584193  | 0.344119  | 106 | C | -7.084450 | -7.403884  | -1.535375 |
| 45 | H  | -2.771066 | 2.318052  | 1.258366  | 107 | H | -7.442182 | -8.119581  | -0.781327 |
| 46 | C  | -5.646653 | 2.467172  | -1.318609 | 108 | H | -6.045496 | -7.688625  | -1.754974 |
| 47 | H  | -5.206725 | 0.381961  | -1.699357 | 109 | C | -7.923459 | -7.544809  | -2.801338 |
| 48 | C  | -5.279097 | 3.621938  | -0.586117 | 110 | H | -8.962456 | -7.260230  | -2.582467 |
| 49 | H  | -3.961552 | 4.457123  | 0.926952  | 111 | H | -7.566289 | -6.829360  | -3.555604 |
| 50 | C  | -6.747559 | 2.855966  | -2.167059 | 112 | C | -7.899799 | -8.951799  | -3.390472 |
| 51 | C  | -6.991648 | 4.227357  | -1.904440 | 113 | H | -8.256058 | -9.665380  | -2.635224 |
| 52 | C  | -7.531711 | 2.181671  | -3.105881 | 114 | H | -6.860935 | -9.234617  | -3.607813 |
| 53 | C  | -8.010349 | 4.924197  | -2.557760 | 115 | C | -8.740372 | -9.083053  | -4.654441 |
| 54 | C  | -8.542197 | 2.872699  | -3.761753 | 116 | H | -8.706548 | -10.100541 | -5.056309 |
| 55 | H  | -7.354161 | 1.130711  | -3.317324 | 117 | H | -9.790031 | -8.837547  | -4.457945 |
| 56 | C  | -8.775270 | 4.228950  | -3.486605 | 118 | H | -8.384715 | -8.404017  | -5.437415 |
| 57 | H  | -8.206912 | 5.971656  | -2.350468 | 119 | H | 4.615378  | -4.336635  | 3.300327  |
| 58 | H  | -9.160924 | 2.360821  | -4.492572 | 120 | H | 4.931206  | 4.064718   | -3.024250 |
| 59 | H  | -9.573669 | 4.749057  | -4.008339 | 121 | F | 7.461398  | 4.544546   | -3.432699 |
| 60 | C  | -3.956120 | -1.173898 | 0.219448  | 122 | F | 3.844065  | 2.230039   | -1.626404 |
| 61 | C  | -3.629797 | -2.338372 | -0.504642 | 123 | F | 7.104270  | -4.970618  | 3.735740  |
| 62 | C  | -5.029802 | -1.184585 | 1.108093  | 124 | F | 3.650958  | -2.445504  | 1.887927  |

**Table S10.** Cartesian coordinates of the optimized ground-state geometry of **3** optimized with M06 functional.

|    |    |            |           |           |     |   |            |           |           |
|----|----|------------|-----------|-----------|-----|---|------------|-----------|-----------|
| 1  | C  | -8.102916  | -1.280128 | -0.872024 | 61  | H | -5.844906  | 5.090358  | 4.741613  |
| 2  | C  | -9.479747  | -1.391719 | -0.920169 | 62  | C | -3.715178  | 5.070611  | 2.016871  |
| 3  | C  | -10.252202 | -0.448834 | -0.229922 | 63  | H | -3.157814  | 4.335917  | 1.424250  |
| 4  | C  | -9.629038  | 0.593549  | 0.500051  | 64  | H | -4.346872  | 5.648544  | 1.330566  |
| 5  | C  | -8.229764  | 0.686487  | 0.534750  | 65  | H | -2.987707  | 5.756696  | 2.470252  |
| 6  | H  | -12.337359 | -1.092300 | -0.641363 | 66  | N | 3.317066   | 0.039656  | 0.005524  |
| 7  | H  | -9.960484  | -2.190310 | -1.477922 | 67  | C | 1.916240   | 0.020424  | -0.015212 |
| 8  | C  | -11.678724 | -0.383422 | -0.150327 | 68  | S | -10.822737 | 1.620383  | 1.261022  |
| 9  | C  | -12.108739 | 0.657310  | 0.602831  | 69  | C | -3.557249  | -0.080208 | -0.095679 |
| 10 | H  | -13.132059 | 0.936257  | 0.825418  | 70  | C | -2.334835  | -0.047925 | -0.074714 |
| 11 | C  | -7.112654  | -2.154919 | -1.516965 | 71  | C | 4.028052   | 1.268087  | 0.083617  |
| 12 | C  | -5.739947  | -1.848627 | -1.327266 | 72  | C | 3.717332   | 2.314532  | -0.805090 |
| 13 | C  | -7.465406  | -3.256638 | -2.295143 | 73  | C | 5.054037   | 1.421279  | 1.012426  |
| 14 | C  | -4.783369  | -2.654514 | -1.923501 | 74  | C | 4.397182   | 3.522675  | -0.770344 |
| 15 | C  | -6.483313  | -4.049045 | -2.880839 | 75  | H | 2.922171   | 2.161010  | -1.531531 |
| 16 | H  | -8.512583  | -3.511507 | -2.454963 | 76  | C | 5.766849   | 2.617766  | 1.044577  |
| 17 | C  | -5.125212  | -3.767481 | -2.709482 | 77  | H | 5.294461   | 0.604059  | 1.690943  |
| 18 | H  | -3.732290  | -2.406211 | -1.770070 | 78  | C | 5.423757   | 3.667737  | 0.161815  |
| 19 | H  | -6.795411  | -4.899921 | -3.480375 | 79  | H | 4.143568   | 4.318035  | -1.468033 |
| 20 | C  | -7.364647  | 1.662731  | 1.214142  | 80  | C | 6.868720   | 3.096632  | 1.842624  |
| 21 | C  | -5.959606  | 1.492096  | 1.062519  | 81  | C | 7.141542   | 4.414000  | 1.404226  |
| 22 | C  | -7.834459  | 2.727545  | 1.985330  | 82  | C | 7.635367   | 2.535839  | 2.864181  |
| 23 | C  | -5.101582  | 2.384919  | 1.681450  | 83  | C | 8.174269   | 5.168635  | 1.959783  |
| 24 | C  | -6.947017  | 3.608274  | 2.595537  | 84  | C | 8.660024   | 3.285048  | 3.425956  |
| 25 | H  | -8.898553  | 2.898711  | 2.130400  | 85  | H | 7.433140   | 1.523719  | 3.210472  |
| 26 | C  | -5.565624  | 3.459294  | 2.458890  | 86  | C | 8.923638   | 4.586043  | 2.974102  |
| 27 | H  | -4.028356  | 2.238748  | 1.553727  | 87  | H | 8.392380   | 6.176481  | 1.612413  |
| 28 | H  | -7.356593  | 4.422707  | 3.186502  | 88  | H | 9.268006   | 2.860699  | 4.221144  |
| 29 | Au | -5.522593  | -0.161461 | -0.126572 | 89  | H | 9.735213   | 5.152883  | 3.424913  |
| 30 | C  | -0.911135  | -0.021486 | -0.055000 | 90  | C | 4.061577   | -1.170356 | -0.048103 |
| 31 | C  | -0.210334  | 1.011018  | 0.588046  | 91  | C | 3.753916   | -2.220929 | 0.836683  |
| 32 | C  | -0.161726  | -1.032126 | -0.678252 | 92  | C | 5.114864   | -1.300997 | -0.949304 |
| 33 | C  | 1.173320   | 1.032364  | 0.613719  | 93  | C | 4.463861   | -3.412041 | 0.824376  |
| 34 | H  | -0.773834  | 1.799153  | 1.085281  | 94  | H | 2.936289   | -2.084672 | 1.541314  |
| 35 | C  | 1.221819   | -1.012381 | -0.665167 | 95  | C | 5.857449   | -2.479698 | -0.958360 |
| 36 | H  | -0.687491  | -1.837058 | -1.189924 | 96  | H | 5.352222   | -0.480300 | -1.624703 |
| 37 | H  | 1.694545   | 1.834671  | 1.130426  | 97  | C | 5.517186   | -3.534947 | -0.080757 |
| 38 | H  | 1.780922   | -1.798589 | -1.166690 | 98  | H | 4.211960   | -4.211046 | 1.518513  |
| 39 | N  | -7.555883  | -0.257776 | -0.155788 | 99  | C | 6.990629   | -2.934325 | -1.726195 |
| 40 | C  | -4.019252  | -4.608676 | -3.339633 | 100 | C | 7.283529   | -4.243507 | -1.276258 |
| 41 | C  | -3.108553  | -5.162189 | -2.236936 | 101 | C | 7.769573   | -2.358428 | -2.729917 |
| 42 | H  | -2.634244  | -4.363181 | -1.655263 | 102 | C | 8.347694   | -4.974954 | -1.802648 |
| 43 | H  | -3.675810  | -5.794075 | -1.541907 | 103 | C | 8.825782   | -3.084625 | -3.262690 |
| 44 | H  | -2.310197  | -5.772854 | -2.678799 | 104 | H | 7.552224   | -1.352492 | -3.084928 |
| 45 | C  | -4.569125  | -5.787786 | -4.139284 | 105 | C | 9.108639   | -4.377627 | -2.799646 |
| 46 | H  | -5.204371  | -5.456999 | -4.970738 | 106 | H | 8.580818   | -5.976248 | -1.446231 |
| 47 | H  | -3.736994  | -6.360169 | -4.567191 | 107 | H | 9.443610   | -2.648283 | -4.043670 |
| 48 | H  | -5.152142  | -6.471691 | -3.509398 | 108 | H | 9.944729   | -4.926257 | -3.227611 |
| 49 | C  | -3.194677  | -3.729548 | -4.287899 | 109 | N | 6.246456   | 4.755587  | 0.404543  |
| 50 | H  | -3.824388  | -3.320837 | -5.088259 | 110 | N | 6.371661   | -4.603336 | -0.298381 |
| 51 | H  | -2.727215  | -2.887755 | -3.764014 | 111 | C | 6.279541   | 5.973502  | -0.374843 |
| 52 | H  | -2.394736  | -4.321461 | -4.751986 | 112 | H | 5.252307   | 6.210115  | -0.685794 |
| 53 | C  | -4.561420  | 4.404847  | 3.109072  | 113 | H | 6.593817   | 6.794722  | 0.284343  |
| 54 | C  | -3.647295  | 3.607193  | 4.047278  | 114 | C | 6.410858   | -5.819703 | 0.483143  |
| 55 | H  | -4.229867  | 3.116866  | 4.837324  | 115 | H | 5.381233   | -6.077601 | 0.768247  |
| 56 | H  | -3.084056  | 2.832907  | 3.513505  | 116 | H | 6.758843   | -6.634724 | -0.166773 |
| 57 | H  | -2.921867  | 4.278362  | 4.525468  | 117 | C | 7.293443   | -5.707745 | 1.717087  |
| 58 | C  | -5.240483  | 5.503283  | 3.923995  | 118 | H | 8.313697   | -5.437429 | 1.403550  |
| 59 | H  | -4.477778  | 6.152106  | 4.371527  | 119 | H | 6.932478   | -4.874931 | 2.340333  |
| 60 | H  | -5.886596  | 6.134349  | 3.300624  | 120 | C | 7.318796   | -6.993301 | 2.527023  |

|     |   |           |           |           |
|-----|---|-----------|-----------|-----------|
| 121 | H | 6.291961  | -7.259462 | 2.827220  |
| 122 | H | 7.669554  | -7.822486 | 1.890763  |
| 123 | C | 8.197972  | -6.899131 | 3.763705  |
| 124 | H | 9.224832  | -6.633569 | 3.463394  |
| 125 | H | 7.848389  | -6.068760 | 4.398840  |
| 126 | C | 8.225975  | -8.182353 | 4.579960  |
| 127 | H | 7.198788  | -8.443721 | 4.876893  |
| 128 | H | 8.573035  | -9.008960 | 3.941268  |
| 129 | C | 9.109476  | -8.072333 | 5.811132  |
| 130 | H | 8.761752  | -7.269747 | 6.473888  |
| 131 | H | 9.122489  | -9.000860 | 6.391889  |
| 132 | H | 10.144954 | -7.839342 | 5.532146  |
| 133 | C | 7.195350  | 5.881540  | -1.586032 |
| 134 | H | 8.212708  | 5.632320  | -1.246690 |
| 135 | H | 6.867954  | 5.042064  | -2.218811 |
| 136 | C | 7.214452  | 7.168315  | -2.394193 |
| 137 | H | 6.190454  | 7.412641  | -2.721390 |
| 138 | H | 7.530192  | 8.004037  | -1.748242 |
| 139 | C | 8.128070  | 7.094701  | -3.607066 |
| 140 | H | 9.152095  | 6.851188  | -3.279642 |
| 141 | H | 7.813719  | 6.257720  | -4.251835 |
| 142 | C | 8.149930  | 8.379226  | -4.421465 |
| 143 | H | 7.125633  | 8.618410  | -4.745769 |
| 144 | H | 8.461495  | 9.212401  | -3.773110 |
| 145 | C | 9.068435  | 8.290076  | -5.628464 |
| 146 | H | 8.756368  | 7.480897  | -6.300871 |
| 147 | H | 9.076716  | 9.219376  | -6.208070 |
| 148 | H | 10.100891 | 8.079479  | -5.321869 |

**Table S11.** Cartesian coordinates of the optimized ground-state geometry of **5** optimized with M06 functional.

|    |    |            |           |           |     |   |           |           |           |
|----|----|------------|-----------|-----------|-----|---|-----------|-----------|-----------|
| 1  | C  | -7.668957  | -1.641320 | -0.637824 | 61  | C | 6.463857  | 6.146156  | 1.567432  |
| 2  | C  | -9.042276  | -1.783900 | -0.637549 | 62  | C | 4.604238  | 7.462548  | -0.086106 |
| 3  | C  | -9.821514  | -0.756583 | -0.093390 | 63  | H | 1.902796  | 6.223549  | -0.818330 |
| 4  | C  | -9.203587  | 0.401141  | 0.443877  | 64  | H | 1.689248  | 4.486556  | -0.986759 |
| 5  | C  | -7.806205  | 0.517678  | 0.426140  | 65  | C | 1.859547  | 5.145615  | 1.050293  |
| 6  | H  | -11.898438 | -1.498753 | -0.346053 | 66  | H | 3.537279  | 6.155812  | -2.600641 |
| 7  | H  | -9.517864  | -2.671152 | -1.044674 | 67  | H | 3.278556  | 4.421307  | -2.740519 |
| 8  | C  | -11.245925 | -0.708081 | 0.008893  | 68  | C | 5.349535  | 5.005176  | -2.770665 |
| 9  | C  | -11.682024 | 0.431249  | 0.597709  | 69  | C | 6.446208  | 7.536903  | 1.487363  |
| 10 | H  | -12.705680 | 0.724107  | 0.799768  | 70  | H | 7.184192  | 5.639740  | 2.208018  |
| 11 | C  | -6.681509  | -2.604569 | -1.152743 | 71  | C | 5.524793  | 8.191276  | 0.669751  |
| 12 | C  | -5.313531  | -2.251551 | -1.043236 | 72  | H | 3.887163  | 7.977839  | -0.725339 |
| 13 | C  | -7.083152  | -3.814595 | -1.724887 | 73  | H | 2.317572  | 4.243985  | 1.488592  |
| 14 | C  | -4.397234  | -3.163344 | -1.544323 | 74  | H | 2.272397  | 5.998694  | 1.611295  |
| 15 | C  | -6.107443  | -4.677689 | -2.190090 | 75  | C | 0.352459  | 5.075550  | 1.246395  |
| 16 | H  | -8.126145  | -4.104247 | -1.817789 | 76  | H | 6.002853  | 5.762916  | -2.310300 |
| 17 | C  | -4.757741  | -4.379274 | -2.113680 | 77  | H | 5.741394  | 4.028074  | -2.446435 |
| 18 | C  | -6.948095  | 1.610374  | 0.920767  | 78  | C | 5.445992  | 5.109233  | -4.284925 |
| 19 | C  | -5.545514  | 1.426004  | 0.785499  | 79  | H | 7.157439  | 8.119170  | 2.069070  |
| 20 | C  | -7.470480  | 2.776417  | 1.490065  | 80  | H | 5.524332  | 9.277910  | 0.621197  |
| 21 | C  | -4.736250  | 2.454245  | 1.239399  | 81  | H | -0.123058 | 5.963889  | 0.798255  |
| 22 | C  | -6.594257  | 3.756226  | 1.922961  | 82  | H | -0.042150 | 4.209874  | 0.686884  |
| 23 | H  | -8.531452  | 2.966877  | 1.609631  | 83  | C | -0.063417 | 4.957429  | 2.703608  |
| 24 | C  | -5.222787  | 3.624655  | 1.810204  | 84  | H | 5.052117  | 6.085881  | -4.611947 |
| 25 | Au | -5.081716  | -0.396343 | -0.121014 | 85  | H | 4.790925  | 4.352920  | -4.748215 |
| 26 | C  | -0.482425  | -0.202981 | 0.021246  | 86  | C | 6.862858  | 4.936953  | -4.808029 |
| 27 | C  | 0.149465   | 0.753501  | 0.831987  | 87  | H | 0.405394  | 4.061202  | 3.144591  |
| 28 | C  | 0.326141   | -1.066724 | -0.734013 | 88  | H | 0.336097  | 5.812928  | 3.273044  |
| 29 | C  | 1.528516   | 0.847362  | 0.884773  | 89  | C | -1.571331 | 4.882448  | 2.895715  |
| 30 | H  | -0.465235  | 1.419259  | 1.435203  | 90  | H | 7.518869  | 5.692373  | -4.344699 |
| 31 | C  | 1.707058   | -0.958823 | -0.705005 | 91  | H | 7.257312  | 3.960110  | -4.482598 |
| 32 | H  | -0.149637  | -1.817277 | -1.366800 | 92  | C | 6.963114  | 5.042206  | -6.322178 |
| 33 | H  | 1.997295   | 1.586525  | 1.531564  | 93  | H | -2.032777 | 5.786864  | 2.467825  |
| 34 | H  | 2.314324   | -1.618561 | -1.322700 | 94  | H | -1.969736 | 4.036901  | 2.313746  |
| 35 | N  | -7.123600  | -0.509580 | -0.116554 | 95  | C | -1.968591 | 4.739321  | 4.355676  |
| 36 | N  | 3.736215   | 0.133075  | 0.129649  | 96  | H | 6.567342  | 6.018060  | -6.642931 |
| 37 | C  | 2.331130   | 0.002610  | 0.103784  | 97  | H | 6.306038  | 4.287359  | -6.780669 |
| 38 | S  | -10.404633 | 1.509808  | 1.062356  | 98  | C | 8.384939  | 4.867900  | -6.828884 |
| 39 | C  | -3.119981  | -0.313068 | -0.084153 | 99  | H | -1.607432 | 5.589678  | 4.948179  |
| 40 | C  | -1.901813  | -0.277000 | -0.036086 | 100 | H | -3.055650 | 4.682919  | 4.485426  |
| 41 | H  | -4.005562  | -5.070797 | -2.483979 | 101 | H | -1.536119 | 3.829894  | 4.791793  |
| 42 | H  | -4.548608  | 4.406958  | 2.147991  | 102 | H | 8.786699  | 3.887675  | -6.542118 |
| 43 | F  | -7.094020  | 4.869004  | 2.464759  | 103 | H | 8.445945  | 4.945954  | -7.919825 |
| 44 | F  | -3.408568  | 2.353557  | 1.134448  | 104 | H | 9.049947  | 5.629853  | -6.402616 |
| 45 | F  | -6.478873  | -5.839105 | -2.734275 | 105 | C | 4.555865  | -1.002336 | -0.066364 |
| 46 | F  | -3.090506  | -2.891680 | -1.494604 | 106 | C | 5.637627  | -0.950930 | -0.955714 |
| 47 | C  | 4.313545   | 1.417835  | 0.266972  | 107 | C | 4.246808  | -2.201024 | 0.589429  |
| 48 | C  | 5.393130   | 1.618693  | 1.137049  | 108 | C | 6.375916  | -2.094046 | -1.240814 |
| 49 | C  | 3.769705   | 2.502432  | -0.433507 | 109 | H | 5.868673  | -0.009320 | -1.449464 |
| 50 | C  | 5.901124   | 2.894987  | 1.354035  | 110 | C | 4.960161  | -3.341501 | 0.276411  |
| 51 | H  | 5.808088   | 0.763257  | 1.666144  | 111 | H | 3.407920  | -2.231820 | 1.284756  |
| 52 | C  | 4.254839   | 3.771716  | -0.189713 | 112 | C | 6.015475  | -3.301558 | -0.647920 |
| 53 | H  | 2.938239   | 2.338036  | -1.118494 | 113 | H | 7.194358  | -2.044744 | -1.957115 |
| 54 | C  | 5.311152   | 3.980319  | 0.710660  | 114 | C | 4.696494  | -4.757608 | 0.744767  |
| 55 | H  | 6.724000   | 3.038280  | 2.052376  | 115 | C | 6.501193  | -4.666021 | -0.848044 |
| 56 | C  | 3.737345   | 5.083278  | -0.741701 | 116 | C | 5.719999  | -5.531838 | -0.063272 |
| 57 | C  | 5.544386   | 5.420052  | 0.815723  | 117 | C | 3.245507  | -5.165338 | 0.427114  |
| 58 | C  | 4.616583   | 6.078910  | -0.009754 | 118 | C | 4.933361  | -4.919932 | 2.258147  |
| 59 | C  | 2.241525   | 5.253830  | -0.418623 | 119 | C | 7.520157  | -5.165981 | -1.653882 |
| 60 | C  | 3.925323   | 5.178827  | -2.267831 | 120 | C | 5.953259  | -6.897748 | -0.081982 |

|     |   |           |           |           |
|-----|---|-----------|-----------|-----------|
| 121 | H | 3.103187  | -6.221144 | 0.708976  |
| 122 | H | 2.587367  | -4.585838 | 1.095829  |
| 123 | C | 2.791042  | -4.943862 | -1.008427 |
| 124 | H | 4.713645  | -5.965755 | 2.530148  |
| 125 | H | 4.185614  | -4.307369 | 2.788424  |
| 126 | C | 6.322873  | -4.551577 | 2.753035  |
| 127 | C | 7.750072  | -6.539934 | -1.668773 |
| 128 | H | 8.127336  | -4.498486 | -2.263369 |
| 129 | C | 6.973897  | -7.399992 | -0.892008 |
| 130 | H | 5.351368  | -7.573385 | 0.525971  |
| 131 | H | 3.075965  | -3.928794 | -1.328762 |
| 132 | H | 3.317136  | -5.632192 | -1.687925 |
| 133 | C | 1.285441  | -5.094752 | -1.166922 |
| 134 | H | 7.077256  | -5.171914 | 2.244260  |
| 135 | H | 6.550377  | -3.509249 | 2.478380  |
| 136 | C | 6.464786  | -4.718706 | 4.258011  |
| 137 | H | 8.542075  | -6.947023 | -2.293513 |
| 138 | H | 7.166088  | -8.470275 | -0.917917 |
| 139 | H | 0.987595  | -6.141215 | -0.990139 |
| 140 | H | 0.782301  | -4.502223 | -0.383634 |
| 141 | C | 0.772154  | -4.630366 | -2.520116 |
| 142 | H | 6.229562  | -5.759572 | 4.535977  |
| 143 | H | 5.712707  | -4.095812 | 4.770000  |
| 144 | C | 7.849855  | -4.361126 | 4.772369  |
| 145 | H | 1.017083  | -3.559899 | -2.644142 |
| 146 | H | 1.308512  | -5.151715 | -3.329845 |
| 147 | C | -0.727790 | -4.823295 | -2.687716 |
| 148 | H | 8.602387  | -4.984925 | 4.262235  |
| 149 | H | 8.086835  | -3.320964 | 4.493719  |
| 150 | C | 7.994613  | -4.525642 | 6.277584  |
| 151 | H | -0.955634 | -5.900673 | -2.690224 |
| 152 | H | -1.244727 | -4.406389 | -1.810611 |
| 153 | C | -1.266467 | -4.167582 | -3.947996 |
| 154 | H | 7.754980  | -5.564544 | 6.551670  |
| 155 | H | 7.241675  | -3.901504 | 6.782846  |
| 156 | C | 9.384392  | -4.165958 | 6.775443  |
| 157 | H | -0.752150 | -4.542774 | -4.842218 |
| 158 | H | -2.339691 | -4.347059 | -4.084711 |
| 159 | H | -1.118732 | -3.080113 | -3.913896 |
| 160 | H | 9.630248  | -3.123781 | 6.534712  |
| 161 | H | 9.477707  | -4.287543 | 7.860105  |
| 162 | H | 10.146803 | -4.798065 | 6.302496  |



**Table S12.** Cartesian coordinates of the optimized ground-state geometry of **6** optimized with M06 functional.

|    |    |           |           |           |     |   |            |           |           |
|----|----|-----------|-----------|-----------|-----|---|------------|-----------|-----------|
| 1  | C  | 8.201900  | -1.253379 | 0.955097  | 63  | C | -4.445233  | -3.502796 | -0.438674 |
| 2  | C  | 9.575826  | -1.340859 | 1.062397  | 64  | H | -2.916232  | -2.332369 | -1.388441 |
| 3  | C  | 10.361733 | -0.416476 | 0.365195  | 65  | C | -5.770328  | -2.281645 | 1.216872  |
| 4  | C  | 9.749725  | 0.585148  | -0.430006 | 66  | H | -5.209445  | -0.217505 | 1.561906  |
| 5  | C  | 8.351335  | 0.649029  | -0.516633 | 67  | C | -5.473870  | -3.464739 | 0.501780  |
| 6  | H  | 12.436438 | -1.012648 | 0.883454  | 68  | H | -4.226891  | -4.402834 | -1.009614 |
| 7  | H  | 10.046991 | -2.107323 | 1.670357  | 69  | C | -6.887854  | -2.590550 | 2.075002  |
| 8  | C  | 11.788168 | -0.334553 | 0.338586  | 70  | C | -7.214972  | -3.946807 | 1.838595  |
| 9  | C  | 12.231850 | 0.680388  | -0.440981 | 71  | C | -7.627079  | -1.853157 | 3.000058  |
| 10 | H  | 13.258462 | 0.966516  | -0.637646 | 72  | C | -8.273572  | -4.568374 | 2.500133  |
| 11 | C  | 7.209606  | -2.126066 | 1.603333  | 73  | C | -8.677387  | -2.468758 | 3.667013  |
| 12 | C  | 5.841479  | -1.856955 | 1.348003  | 74  | H | -7.383727  | -0.809313 | 3.190868  |
| 13 | C  | 7.610959  | -3.174486 | 2.435528  | 75  | C | -8.994042  | -3.811382 | 3.415309  |
| 14 | C  | 4.923193  | -2.690850 | 1.969017  | 76  | H | -8.532855  | -5.607337 | 2.306874  |
| 15 | C  | 6.634250  | -3.961363 | 3.017703  | 77  | H | -9.264283  | -1.906308 | 4.389002  |
| 16 | H  | 8.654421  | -3.394414 | 2.643126  | 78  | H | -9.824799  | -4.271821 | 3.945476  |
| 17 | C  | 5.284779  | -3.743199 | 2.802612  | 79  | N | -6.029081  | 4.738490  | -0.947171 |
| 18 | C  | 7.499171  | 1.589101  | -1.266942 | 80  | N | -6.339425  | -4.469489 | 0.902236  |
| 19 | C  | 6.095242  | 1.393360  | -1.164276 | 81  | C | -5.991230  | 6.032538  | -0.302748 |
| 20 | C  | 8.029565  | 2.625961  | -2.041856 | 82  | H | -4.944330  | 6.265243  | -0.062031 |
| 21 | C  | 5.291174  | 2.275297  | -1.867942 | 83  | H | -6.309759  | 6.789467  | -1.033030 |
| 22 | C  | 7.159311  | 3.465019  | -2.714524 | 84  | C | -6.410199  | -5.795334 | 0.329173  |
| 23 | H  | 9.091603  | 2.817544  | -2.148778 | 85  | H | -6.757357  | -6.487942 | 1.108640  |
| 24 | C  | 5.787198  | 3.314456  | -2.647282 | 86  | H | -5.389705  | -6.113615 | 0.073291  |
| 25 | Au | 5.619063  | -0.221976 | 0.069466  | 87  | C | -6.853813  | 6.103216  | 0.948357  |
| 26 | C  | 1.017160  | -0.113457 | -0.112085 | 88  | H | -7.893104  | 5.857050  | 0.680772  |
| 27 | C  | 0.330597  | 0.839072  | -0.881654 | 89  | H | -6.525105  | 5.324592  | 1.654046  |
| 28 | C  | 0.258069  | -1.032962 | 0.628552  | 90  | C | -6.793516  | 7.468930  | 1.611841  |
| 29 | C  | -1.052272 | 0.872513  | -0.911874 | 91  | H | -7.111657  | 8.241764  | 0.892862  |
| 30 | H  | 0.906258  | 1.552089  | -1.468852 | 92  | H | -5.747700  | 7.708211  | 1.865643  |
| 31 | C  | -1.125507 | -0.997559 | 0.612053  | 93  | C | -7.650443  | 7.561390  | 2.864220  |
| 32 | H  | 0.779026  | -1.771568 | 1.235036  | 94  | H | -8.696716  | 7.324457  | 2.610577  |
| 33 | H  | -1.565262 | 1.610512  | -1.523942 | 95  | H | -7.334384  | 6.786873  | 3.582087  |
| 34 | H  | -1.694064 | -1.707818 | 1.207488  | 96  | C | -7.589093  | 8.925912  | 3.533441  |
| 35 | N  | 7.661777  | -0.275245 | 0.180323  | 97  | H | -7.902932  | 9.696083  | 2.812329  |
| 36 | N  | -3.207606 | 0.003568  | -0.178078 | 98  | H | -6.542655  | 9.158141  | 3.783713  |
| 37 | C  | -1.806611 | -0.042177 | -0.159218 | 99  | C | -8.450438  | 9.003540  | 4.782683  |
| 38 | S  | 10.959340 | 1.594900  | -1.186583 | 100 | H | -8.398154  | 9.989261  | 5.257301  |
| 39 | C  | 3.658415  | -0.173233 | -0.031625 | 101 | H | -9.503314  | 8.802562  | 4.547274  |
| 40 | C  | 2.439316  | -0.143218 | -0.075078 | 102 | H | -8.134346  | 8.259324  | 5.524688  |
| 41 | C  | -3.889379 | 1.238678  | -0.354360 | 103 | C | -7.313493  | -5.872517 | -0.892386 |
| 42 | C  | -3.521026 | 2.358646  | 0.414571  | 104 | H | -8.324174  | -5.537512 | -0.612108 |
| 43 | C  | -4.945345 | 1.327267  | -1.257865 | 105 | H | -6.952340  | -5.160048 | -1.650169 |
| 44 | C  | -4.171306 | 3.575962  | 0.281748  | 106 | C | -7.369823  | -7.273907 | -1.477313 |
| 45 | H  | -2.703976 | 2.256012  | 1.125460  | 107 | H | -7.725389  | -7.979362 | -0.708345 |
| 46 | C  | -5.629521 | 2.534276  | -1.385810 | 108 | H | -6.351030  | -7.604242 | -1.738723 |
| 47 | H  | -5.229907 | 0.453020  | -1.841581 | 109 | C | -8.262185  | -7.372528 | -2.704148 |
| 48 | C  | -5.226981 | 3.656381  | -0.625133 | 110 | H | -9.280630  | -7.040402 | -2.444171 |
| 49 | H  | -3.873085 | 4.429480  | 0.886960  | 111 | H | -7.905629  | -6.668379 | -3.473642 |
| 50 | C  | -6.747689 | 2.964389  | -2.189912 | 112 | C | -8.322082  | -8.774604 | -3.290887 |
| 51 | C  | -6.968708 | 4.326621  | -1.876628 | 113 | H | -8.678539  | -9.473815 | -2.519090 |
| 52 | C  | -7.567081 | 2.329895  | -3.123999 | 114 | H | -7.302784  | -9.103088 | -3.545315 |
| 53 | C  | -7.999763 | 5.054512  | -2.469197 | 115 | C | -9.214690  | -8.857294 | -4.517631 |
| 54 | C  | -8.590563 | 3.051637  | -3.722789 | 116 | H | -9.251332  | -9.870657 | -4.931651 |
| 55 | H  | -7.406081 | 1.282787  | -3.374666 | 117 | H | -10.242766 | -8.558526 | -4.276507 |
| 56 | C  | -8.801625 | 4.398449  | -3.394549 | 118 | H | -8.857358  | -8.186653 | -5.309372 |
| 57 | H  | -8.177007 | 6.097935  | -2.216487 | 119 | H | 4.531740   | -4.371080 | 3.268389  |
| 58 | H  | -9.238551 | 2.569855  | -4.450846 | 120 | H | 5.119079   | 3.982218  | -3.181982 |
| 59 | H  | -9.613300 | 4.942885  | -3.872035 | 121 | F | 7.665403   | 4.454896  | -3.453967 |
| 60 | C  | -3.977774 | -1.164322 | 0.073212  | 122 | F | 3.963792   | 2.154589  | -1.820486 |
| 61 | C  | -3.715362 | -2.342875 | -0.650330 | 123 | F | 7.004404   | -4.966811 | 3.815387  |
| 62 | C  | -5.007024 | -1.134564 | 1.010570  | 124 | F | 3.614929   | -2.506978 | 1.782380  |

**Table S13.** Cartesian coordinates of the optimized T<sub>1</sub> geometry of **1** computed by DFT/CPCM.

|    |    |           |           |           |    |   |           |           |           |
|----|----|-----------|-----------|-----------|----|---|-----------|-----------|-----------|
| 1  | C  | -4.670537 | 1.532155  | 0.104522  | 61 | H | -2.381309 | -6.789842 | -1.407307 |
| 2  | C  | -6.071961 | 1.662856  | 0.105411  | 62 | C | -0.224030 | -5.311300 | 0.865760  |
| 3  | C  | -6.872223 | 0.483640  | 0.009169  | 63 | H | 0.311712  | -4.363867 | 0.976190  |
| 4  | C  | -6.245918 | -0.773213 | -0.083890 | 64 | H | -0.830775 | -5.462243 | 1.764573  |
| 5  | C  | -4.818969 | -0.899914 | -0.084232 | 65 | H | 0.519911  | -6.114460 | 0.817149  |
| 6  | H  | -8.947030 | 1.254363  | 0.055200  | 66 | N | 6.700619  | -0.228804 | -0.011058 |
| 7  | H  | -6.536471 | 2.638314  | 0.177944  | 67 | C | 5.294865  | -0.160704 | -0.000503 |
| 8  | C  | -8.291188 | 0.393377  | -0.007241 | 68 | C | 7.368244  | -1.270104 | 0.674060  |
| 9  | C  | -8.740731 | -0.891876 | -0.109921 | 69 | C | 8.472204  | -1.906308 | 0.092474  |
| 10 | H  | -9.757776 | -1.255880 | -0.144854 | 70 | C | 6.937967  | -1.675635 | 1.943902  |
| 11 | C  | -3.709924 | 2.626106  | 0.195611  | 71 | C | 9.133713  | -2.921647 | 0.774022  |
| 12 | C  | -2.330922 | 2.259202  | 0.177513  | 72 | H | 8.805695  | -1.599364 | -0.893951 |
| 13 | C  | -4.072669 | 3.974296  | 0.297045  | 73 | C | 7.595419  | -2.703964 | 2.609692  |
| 14 | C  | -1.380208 | 3.266120  | 0.263495  | 74 | H | 6.087905  | -1.180083 | 2.402550  |
| 15 | C  | -3.093809 | 4.954096  | 0.380799  | 75 | C | 8.698566  | -3.330674 | 2.033114  |
| 16 | H  | -5.118073 | 4.270531  | 0.311635  | 76 | H | 9.987958  | -3.405479 | 0.308841  |
| 17 | C  | -1.729841 | 4.624132  | 0.366249  | 77 | H | 7.249475  | -3.006381 | 3.594094  |
| 18 | H  | -0.331172 | 2.982503  | 0.249578  | 78 | H | 9.213534  | -4.128623 | 2.559333  |
| 19 | H  | -3.403017 | 5.990273  | 0.458660  | 79 | C | 7.454163  | 0.740764  | -0.712263 |
| 20 | C  | -3.976539 | -2.029355 | -0.166459 | 80 | C | 8.625617  | 1.267070  | -0.153314 |
| 21 | C  | -2.541222 | -1.786307 | -0.138753 | 81 | C | 7.042399  | 1.183658  | -1.975742 |
| 22 | C  | -4.419276 | -3.378328 | -0.273205 | 82 | C | 9.370527  | 2.211404  | -0.850739 |
| 23 | C  | -1.674918 | -2.859570 | -0.215340 | 83 | H | 8.945622  | 0.930942  | 0.828073  |
| 24 | C  | -3.514218 | -4.413497 | -0.346320 | 84 | C | 7.784782  | 2.141337  | -2.657374 |
| 25 | H  | -5.477466 | -3.616020 | -0.298546 | 85 | H | 6.139716  | 0.772632  | -2.417023 |
| 26 | C  | -2.117732 | -4.193440 | -0.319939 | 86 | C | 8.954340  | 2.658352  | -2.103358 |
| 27 | H  | -0.608349 | -2.651598 | -0.192955 | 87 | H | 10.276466 | 2.610294  | -0.403091 |
| 28 | H  | -3.898183 | -5.424767 | -0.426249 | 88 | H | 7.452026  | 2.473930  | -3.636580 |
| 29 | Au | -2.125114 | 0.213397  | 0.019078  | 89 | H | 9.535100  | 3.400969  | -2.641932 |
| 30 | C  | 2.469564  | -0.022106 | 0.015289  | 90 | S | -7.429477 | -2.017118 | -0.188431 |
| 31 | C  | 3.136875  | -1.259575 | -0.032560 | 91 | C | -0.174484 | 0.109052  | 0.021396  |
| 32 | C  | 3.255309  | 1.144037  | 0.056544  | 92 | C | 1.048308  | 0.048252  | 0.019814  |
| 33 | C  | 4.520036  | -1.329535 | -0.047013 |    |   |           |           |           |
| 34 | H  | 2.551977  | -2.173590 | -0.074483 |    |   |           |           |           |
| 35 | C  | 4.638640  | 1.078258  | 0.055647  |    |   |           |           |           |
| 36 | H  | 2.763077  | 2.110824  | 0.104175  |    |   |           |           |           |
| 37 | H  | 5.012562  | -2.295281 | -0.098857 |    |   |           |           |           |
| 38 | H  | 5.224007  | 1.991070  | 0.101295  |    |   |           |           |           |
| 39 | N  | -4.112603 | 0.319899  | 0.014904  |    |   |           |           |           |
| 40 | C  | -0.629035 | 5.680788  | 0.457477  |    |   |           |           |           |
| 41 | C  | 0.253189  | 5.599843  | -0.800295 |    |   |           |           |           |
| 42 | H  | 0.720283  | 4.616471  | -0.907262 |    |   |           |           |           |
| 43 | H  | -0.333952 | 5.794360  | -1.703770 |    |   |           |           |           |
| 44 | H  | 1.052422  | 6.347297  | -0.745502 |    |   |           |           |           |
| 45 | C  | -1.187926 | 7.102361  | 0.562788  |    |   |           |           |           |
| 46 | H  | -1.804015 | 7.233138  | 1.458706  |    |   |           |           |           |
| 47 | H  | -0.359754 | 7.815466  | 0.624904  |    |   |           |           |           |
| 48 | H  | -1.789193 | 7.370205  | -0.312480 |    |   |           |           |           |
| 49 | C  | 0.231623  | 5.405686  | 1.702615  |    |   |           |           |           |
| 50 | H  | -0.371014 | 5.460290  | 2.615119  |    |   |           |           |           |
| 51 | H  | 0.697306  | 4.416591  | 1.665032  |    |   |           |           |           |
| 52 | H  | 1.031314  | 6.150970  | 1.777047  |    |   |           |           |           |
| 53 | C  | -1.100903 | -5.328025 | -0.399055 |    |   |           |           |           |
| 54 | C  | -0.209193 | -5.123385 | -1.636769 |    |   |           |           |           |
| 55 | H  | -0.805219 | -5.137820 | -2.555089 |    |   |           |           |           |
| 56 | H  | 0.326932  | -4.170557 | -1.598071 |    |   |           |           |           |
| 57 | H  | 0.534819  | -5.925462 | -1.699974 |    |   |           |           |           |
| 58 | C  | -1.764915 | -6.703691 | -0.506174 |    |   |           |           |           |
| 59 | H  | -0.993079 | -7.478161 | -0.559142 |    |   |           |           |           |
| 60 | H  | -2.392770 | -6.922243 | 0.364148  |    |   |           |           |           |

**Table S14.** Cartesian coordinates of the optimized T<sub>1</sub> geometry of **3** computed by DFT/CPCM.

|    |    |            |           |           |     |   |            |           |           |
|----|----|------------|-----------|-----------|-----|---|------------|-----------|-----------|
| 1  | C  | -8.033639  | -1.060110 | -1.029734 | 61  | H | -5.402618  | 4.149261  | 5.562636  |
| 2  | C  | -9.402323  | -1.111308 | -1.072253 | 62  | C | -3.304884  | 4.488226  | 2.831064  |
| 3  | C  | -10.153639 | -0.271593 | -0.204828 | 63  | H | -2.811053  | 3.835844  | 2.104085  |
| 4  | C  | -9.468246  | 0.598820  | 0.683322  | 64  | H | -3.908877  | 5.211950  | 2.273716  |
| 5  | C  | -8.070207  | 0.647078  | 0.722986  | 65  | H | -2.526960  | 5.038305  | 3.374229  |
| 6  | H  | -12.260874 | -0.749787 | -0.680177 | 66  | N | 3.363857   | 0.010754  | -0.010829 |
| 7  | H  | -9.911328  | -1.780885 | -1.756717 | 67  | C | 1.972648   | -0.022788 | -0.034390 |
| 8  | C  | -11.567184 | -0.165137 | -0.085408 | 68  | S | -10.614588 | 1.515193  | 1.631702  |
| 9  | C  | -11.963803 | 0.744039  | 0.850274  | 69  | C | -3.483303  | -0.143514 | -0.120705 |
| 10 | H  | -12.969416 | 1.017799  | 1.138633  | 70  | C | -2.249561  | -0.122155 | -0.106342 |
| 11 | C  | -7.088307  | -1.839356 | -1.838472 | 71  | C | 4.043899   | 1.243190  | 0.065929  |
| 12 | C  | -5.705156  | -1.603858 | -1.609487 | 72  | C | 3.577734   | 2.342032  | -0.691026 |
| 13 | C  | -7.471718  | -2.778169 | -2.798475 | 73  | C | 5.176760   | 1.364798  | 0.880775  |
| 14 | C  | -4.774132  | -2.321215 | -2.355822 | 74  | C | 4.215603   | 3.566338  | -0.640401 |
| 15 | C  | -6.516282  | -3.479048 | -3.527375 | 75  | H | 2.717817   | 2.207222  | -1.338538 |
| 16 | H  | -8.524820  | -2.972857 | -2.987837 | 76  | C | 5.828153   | 2.587991  | 0.939543  |
| 17 | C  | -5.147126  | -3.267215 | -3.323374 | 77  | H | 5.517598   | 0.516935  | 1.466267  |
| 18 | H  | -3.717945  | -2.134016 | -2.174076 | 78  | C | 5.339710   | 3.691134  | 0.184963  |
| 19 | H  | -6.855402  | -4.199823 | -4.264030 | 79  | H | 3.855797   | 4.393148  | -1.243424 |
| 20 | C  | -7.172574  | 1.441455  | 1.533110  | 80  | C | 6.984886   | 3.066199  | 1.659271  |
| 21 | C  | -5.771347  | 1.238876  | 1.315011  | 81  | C | 7.139296   | 4.425985  | 1.302293  |
| 22 | C  | -7.563240  | 2.382331  | 2.501481  | 82  | C | 7.882777   | 2.477095  | 2.551293  |
| 23 | C  | -4.856729  | 1.972529  | 2.060314  | 83  | C | 8.177440   | 5.203794  | 1.813917  |
| 24 | C  | -6.618873  | 3.097495  | 3.227243  | 84  | C | 8.916163   | 3.248170  | 3.067592  |
| 25 | H  | -8.613195  | 2.570978  | 2.703277  | 85  | H | 7.776016   | 1.434270  | 2.836089  |
| 26 | C  | -5.244199  | 2.914326  | 3.028118  | 86  | C | 9.058109   | 4.594433  | 2.700183  |
| 27 | H  | -3.797739  | 1.802249  | 1.877928  | 87  | H | 8.302906   | 6.244760  | 1.533771  |
| 28 | H  | -6.974213  | 3.811990  | 3.962810  | 88  | H | 9.623826   | 2.806445  | 3.762098  |
| 29 | Au | -5.429559  | -0.175209 | -0.141038 | 89  | H | 9.875963   | 5.176109  | 3.114974  |
| 30 | C  | -0.850832  | -0.090369 | -0.083177 | 90  | C | 4.104680   | -1.187549 | -0.062937 |
| 31 | C  | -0.152197  | 0.895050  | 0.665840  | 91  | C | 3.667357   | -2.307334 | 0.680320  |
| 32 | C  | -0.080665  | -1.040904 | -0.806389 | 92  | C | 5.268544   | -1.254442 | -0.839417 |
| 33 | C  | 1.221316   | 0.932552  | 0.687833  | 93  | C | 4.365405   | -3.499188 | 0.653769  |
| 34 | H  | -0.724672  | 1.615159  | 1.241229  | 94  | H | 2.780798   | -2.214069 | 1.298573  |
| 35 | C  | 1.293102   | -1.012658 | -0.780903 | 95  | C | 5.980279   | -2.444519 | -0.873661 |
| 36 | H  | -0.597789  | -1.787426 | -1.400188 | 96  | H | 5.587356   | -0.391370 | -1.415022 |
| 37 | H  | 1.737755   | 1.675351  | 1.286851  | 97  | C | 5.521359   | -3.569575 | -0.133113 |
| 38 | H  | 1.865005   | -1.729645 | -1.360685 | 98  | H | 4.026416   | -4.342023 | 1.246555  |
| 39 | N  | -7.406736  | -0.202369 | -0.153738 | 99  | C | 7.182556   | -2.866027 | -1.552984 |
| 40 | C  | -4.067325  | -4.018989 | -4.106533 | 100 | C | 7.391500   | -4.216214 | -1.187385 |
| 41 | C  | -3.179185  | -4.804602 | -3.127424 | 101 | C | 8.079837   | -2.234295 | -2.415993 |
| 42 | H  | -2.694600  | -4.143323 | -2.402523 | 102 | C | 8.483416   | -4.942345 | -1.661711 |
| 43 | H  | -3.769685  | -5.538029 | -2.568339 | 103 | C | 9.166657   | -2.954040 | -2.895338 |
| 44 | H  | -2.393642  | -5.342000 | -3.671899 | 104 | H | 7.931472   | -1.198260 | -2.706936 |
| 45 | C  | -4.659279  | -5.009340 | -5.113308 | 105 | C | 9.362294   | -4.291262 | -2.519628 |
| 46 | H  | -5.281680  | -4.505459 | -5.860340 | 106 | H | 8.650700   | -5.975466 | -1.374503 |
| 47 | H  | -3.850277  | -5.520678 | -5.645942 | 107 | H | 9.874689   | -2.478684 | -3.566886 |
| 48 | H  | -5.267739  | -5.774784 | -4.620105 | 108 | H | 10.221348  | -4.832329 | -2.905056 |
| 49 | C  | -3.200798  | -3.010485 | -4.878911 | 109 | N | 6.127959   | 4.785822  | 0.422438  |
| 50 | H  | -3.807235  | -2.441244 | -5.591162 | 110 | N | 6.369923   | -4.624537 | -0.341171 |
| 51 | H  | -2.716416  | -2.296042 | -4.206369 | 111 | C | 5.983609   | 6.086885  | -0.199816 |
| 52 | H  | -2.415830  | -3.532179 | -5.439261 | 112 | H | 4.918184   | 6.255544  | -0.387024 |
| 53 | C  | -4.178652  | 3.685855  | 3.809773  | 113 | H | 6.290971   | 6.843472  | 0.529875  |
| 54 | C  | -3.291650  | 2.695607  | 4.582921  | 114 | C | 6.269094   | -5.930098 | 0.280222  |
| 55 | H  | -3.886466  | 2.116390  | 5.296953  | 115 | H | 5.207561   | -6.151132 | 0.431684  |
| 56 | H  | -2.795782  | 1.988670  | 3.910547  | 116 | H | 6.638264   | -6.671852 | -0.435923 |
| 57 | H  | -2.514811  | 3.231987  | 5.141128  | 117 | C | 7.032500   | -6.030625 | 1.598287  |
| 58 | C  | -4.789438  | 4.665107  | 4.816136  | 118 | H | 8.087257   | -5.785438 | 1.420214  |
| 59 | H  | -3.990955  | 5.192620  | 5.349130  | 119 | H | 6.648589   | -5.271984 | 2.292299  |
| 60 | H  | -5.412939  | 5.417870  | 4.322192  | 120 | C | 6.918690   | -7.415797 | 2.225520  |

|     |   |          |            |           |
|-----|---|----------|------------|-----------|
| 121 | H | 5.859133 | -7.656787  | 2.391344  |
| 122 | H | 7.295048 | -8.169087  | 1.519014  |
| 123 | C | 7.676126 | -7.537893  | 3.543834  |
| 124 | H | 8.735556 | -7.296018  | 3.378176  |
| 125 | H | 7.300078 | -6.784578  | 4.250511  |
| 126 | C | 7.568047 | -8.921433  | 4.177474  |
| 127 | H | 6.508989 | -9.161578  | 4.341726  |
| 128 | H | 7.942882 | -9.672917  | 3.469592  |
| 129 | C | 8.327967 | -9.034302  | 5.493124  |
| 130 | H | 7.950872 | -8.316515  | 6.230080  |
| 131 | H | 8.234595 | -10.034994 | 5.926099  |
| 132 | H | 9.395351 | -8.831219  | 5.351610  |
| 133 | C | 6.785601 | 6.229616   | -1.490789 |
| 134 | H | 7.844379 | 6.035251   | -1.277354 |
| 135 | H | 6.462918 | 5.455978   | -2.199257 |
| 136 | C | 6.625954 | 7.610127   | -2.118306 |
| 137 | H | 5.562201 | 7.800123   | -2.319693 |
| 138 | H | 6.940984 | 8.377919   | -1.397548 |
| 139 | C | 7.421051 | 7.774135   | -3.409613 |
| 140 | H | 8.484670 | 7.582916   | -3.208377 |
| 141 | H | 7.106159 | 7.006556   | -4.130700 |
| 142 | C | 7.267949 | 9.153520   | -4.043031 |
| 143 | H | 6.204771 | 9.342997   | -4.243029 |
| 144 | H | 7.581515 | 9.919193   | -3.320711 |
| 145 | C | 8.066151 | 9.308532   | -5.331439 |
| 146 | H | 7.749768 | 8.576461   | -6.082780 |
| 147 | H | 7.939282 | 10.305355  | -5.764821 |
| 148 | H | 9.136650 | 9.156709   | -5.153776 |

**Table S15.** Cartesian coordinates of the optimized T<sub>1</sub> geometry of **5** computed by DFT/CPCM.

|    |    |            |           |           |     |   |           |           |           |
|----|----|------------|-----------|-----------|-----|---|-----------|-----------|-----------|
| 1  | C  | -7.699906  | -1.551887 | -0.356315 | 61  | C | 6.811691  | 5.755288  | 1.765342  |
| 2  | C  | -9.064461  | -1.658351 | -0.370773 | 62  | C | 5.106123  | 7.312798  | 0.145748  |
| 3  | C  | -9.849944  | -0.511329 | -0.075208 | 63  | H | 2.354334  | 6.389810  | -0.780757 |
| 4  | C  | -9.201718  | 0.712486  | 0.226988  | 64  | H | 1.959232  | 4.702421  | -1.031577 |
| 5  | C  | -7.802535  | 0.813090  | 0.239465  | 65  | C | 2.056622  | 5.269835  | 1.040313  |
| 6  | H  | -11.936147 | -1.232782 | -0.238429 | 66  | H | 4.043562  | 6.183232  | -2.474445 |
| 7  | H  | -9.547592  | -2.600641 | -0.602076 | 67  | H | 3.625150  | 4.491485  | -2.682142 |
| 8  | C  | -11.268370 | -0.402688 | -0.035344 | 68  | C | 5.745466  | 4.869677  | -2.609850 |
| 9  | C  | -11.701852 | 0.848971  | 0.283104  | 69  | C | 6.922773  | 7.142490  | 1.750075  |
| 10 | H  | -12.718066 | 1.205289  | 0.381446  | 70  | H | 7.468780  | 5.157605  | 2.391083  |
| 11 | C  | -6.734246  | -2.621040 | -0.631292 | 71  | C | 6.076840  | 7.914495  | 0.949085  |
| 12 | C  | -5.361083  | -2.264701 | -0.546227 | 72  | H | 4.455797  | 7.923781  | -0.475105 |
| 13 | C  | -7.134621  | -3.922199 | -0.961066 | 73  | H | 2.379132  | 4.311324  | 1.468674  |
| 14 | C  | -4.448565  | -3.279554 | -0.805939 | 74  | H | 2.519660  | 6.051407  | 1.656367  |
| 15 | C  | -6.161623  | -4.871130 | -1.205337 | 75  | C | 0.535707  | 5.363541  | 1.131200  |
| 16 | H  | -8.178602  | -4.206548 | -1.030906 | 76  | H | 6.441198  | 5.550257  | -2.102480 |
| 17 | C  | -4.806704  | -4.580858 | -1.135216 | 77  | H | 6.027600  | 3.854401  | -2.300409 |
| 18 | C  | -6.946572  | 1.939896  | 0.512076  | 78  | C | 5.920748  | 5.002176  | -4.120023 |
| 19 | C  | -5.534688  | 1.691291  | 0.433890  | 79  | H | 7.671505  | 7.630576  | 2.366895  |
| 20 | C  | -7.421257  | 3.227109  | 0.841288  | 80  | H | 6.176434  | 8.996090  | 0.952131  |
| 21 | C  | -4.697041  | 2.764122  | 0.693047  | 81  | H | 0.199592  | 6.325264  | 0.718435  |
| 22 | C  | -6.512328  | 4.234345  | 1.084318  | 82  | H | 0.092941  | 4.588814  | 0.488455  |
| 23 | H  | -8.475222  | 3.463915  | 0.913479  | 83  | C | -0.009141 | 5.201090  | 2.546232  |
| 24 | C  | -5.138712  | 4.042474  | 1.019724  | 84  | H | 5.636879  | 6.017405  | -4.432015 |
| 25 | Au | -5.120322  | -0.267274 | -0.053626 | 85  | H | 5.222389  | 4.323208  | -4.630098 |
| 26 | C  | -0.551728  | -0.092046 | -0.034357 | 86  | C | 7.341741  | 4.710122  | -4.590988 |
| 27 | C  | 0.136830   | 0.809741  | 0.821493  | 87  | H | 0.366120  | 4.259285  | 2.973584  |
| 28 | C  | 0.218758   | -0.935799 | -0.879355 | 88  | H | 0.385319  | 6.001849  | 3.188029  |
| 29 | C  | 1.507963   | 0.875130  | 0.823934  | 89  | C | -1.534179 | 5.203392  | 2.605843  |
| 30 | H  | -0.443658  | 1.444248  | 1.483013  | 90  | H | 8.040606  | 5.389386  | -4.082096 |
| 31 | C  | 1.590681   | -0.891638 | -0.862001 | 91  | H | 7.627164  | 3.694824  | -4.279626 |
| 32 | H  | -0.299319  | -1.614241 | -1.549025 | 92  | C | 7.520788  | 4.842232  | -6.100237 |
| 33 | H  | 2.021485   | 1.554112  | 1.496153  | 93  | H | -1.909261 | 6.139963  | 2.170295  |
| 34 | H  | 2.166492   | -1.527265 | -1.526125 | 94  | H | -1.922000 | 4.396203  | 1.970515  |
| 35 | N  | -7.102032  | -0.349558 | -0.059042 | 95  | C | -2.080654 | 5.044132  | 4.019090  |
| 36 | N  | 3.649966   | 0.075887  | -0.004628 | 96  | H | 7.235441  | 5.856729  | -6.409702 |
| 37 | C  | 2.264100   | 0.020519  | -0.014120 | 97  | H | 6.821500  | 4.163816  | -6.607478 |
| 38 | S  | -10.386284 | 1.952235  | 0.549001  | 98  | C | 8.942986  | 4.548664  | -6.561385 |
| 39 | C  | -3.176557  | -0.187293 | -0.047517 | 99  | H | -1.749133 | 5.862365  | 4.668374  |
| 40 | C  | -1.944883  | -0.146482 | -0.043710 | 100 | H | -3.175088 | 5.034807  | 4.025262  |
| 41 | H  | -4.057146  | -5.340038 | -1.326712 | 101 | H | -1.739528 | 4.105599  | 4.470522  |
| 42 | H  | -4.442662  | 4.850787  | 1.209276  | 102 | H | 9.242516  | 3.528991  | -6.294127 |
| 43 | F  | -6.970551  | 5.460136  | 1.397130  | 103 | H | 9.043647  | 4.650775  | -7.646445 |
| 44 | F  | -3.357837  | 2.605817  | 0.634123  | 104 | H | 9.658934  | 5.234618  | -6.094902 |
| 45 | F  | -6.533622  | -6.123049 | -1.521987 | 105 | C | 4.401984  | -1.099826 | -0.216143 |
| 46 | F  | -3.125464  | -3.029059 | -0.744065 | 106 | C | 5.513834  | -1.076950 | -1.073142 |
| 47 | C  | 4.303960   | 1.306337  | 0.219131  | 107 | C | 4.002002  | -2.290960 | 0.413084  |
| 48 | C  | 5.405364   | 1.367672  | 1.087912  | 108 | C | 6.200369  | -2.250460 | -1.351354 |
| 49 | C  | 3.816440   | 2.465551  | -0.408260 | 109 | H | 5.801024  | -0.143729 | -1.546947 |
| 50 | C  | 5.991970   | 2.590786  | 1.380341  | 110 | C | 4.691552  | -3.453372 | 0.135285  |
| 51 | H  | 5.761724   | 0.457744  | 1.560008  | 111 | H | 3.160646  | -2.279115 | 1.100149  |
| 52 | C  | 4.406405   | 3.677998  | -0.115535 | 112 | C | 5.776134  | -3.445017 | -0.764050 |
| 53 | H  | 2.985912   | 2.390679  | -1.104466 | 113 | H | 7.038874  | -2.233494 | -2.041129 |
| 54 | C  | 5.478330   | 3.751315  | 0.796057  | 114 | C | 4.434081  | -4.849558 | 0.670508  |
| 55 | H  | 6.821548   | 2.636834  | 2.079525  | 115 | C | 6.253113  | -4.815228 | -0.917714 |
| 56 | C  | 4.039963   | 5.052938  | -0.642305 | 116 | C | 5.460954  | -5.651575 | -0.109246 |
| 57 | C  | 5.838945   | 5.154709  | 0.965755  | 117 | C | 2.979876  | -5.300380 | 0.413662  |
| 58 | C  | 4.988203   | 5.929936  | 0.155872  | 118 | C | 4.703782  | -4.926426 | 2.194537  |
| 59 | C  | 2.550513   | 5.379133  | -0.398988 | 119 | C | 7.280745  | -5.339586 | -1.702054 |
| 60 | C  | 4.318645   | 5.166671  | -2.162332 | 120 | C | 5.693282  | -7.019728 | -0.085052 |

|     |   |           |           |           |
|-----|---|-----------|-----------|-----------|
| 121 | H | 2.862737  | -6.319562 | 0.805137  |
| 122 | H | 2.326435  | -4.667889 | 1.030654  |
| 123 | C | 2.498171  | -5.248082 | -1.032946 |
| 124 | H | 4.514094  | -5.960305 | 2.513215  |
| 125 | H | 3.948680  | -4.309366 | 2.700647  |
| 126 | C | 6.094395  | -4.502908 | 2.654104  |
| 127 | C | 7.506456  | -6.712592 | -1.672835 |
| 128 | H | 7.892536  | -4.694614 | -2.326800 |
| 129 | C | 6.719151  | -7.545421 | -0.873082 |
| 130 | H | 5.089487  | -7.677654 | 0.534844  |
| 131 | H | 2.745186  | -4.270491 | -1.468423 |
| 132 | H | 3.033475  | -5.994642 | -1.633671 |
| 133 | C | 0.991925  | -5.470328 | -1.142991 |
| 134 | H | 6.852321  | -5.123720 | 2.159310  |
| 135 | H | 6.289927  | -3.469197 | 2.338992  |
| 136 | C | 6.265106  | -4.607969 | 4.166959  |
| 137 | H | 8.299634  | -7.141951 | -2.277667 |
| 138 | H | 6.908291  | -8.614973 | -0.865013 |
| 139 | H | 0.731597  | -6.451690 | -0.721719 |
| 140 | H | 0.476215  | -4.727430 | -0.517277 |
| 141 | C | 0.457374  | -5.372456 | -2.567872 |
| 142 | H | 6.070355  | -5.642190 | 4.484831  |
| 143 | H | 5.503627  | -3.990492 | 4.664697  |
| 144 | C | 7.649410  | -4.185672 | 4.648352  |
| 145 | H | 0.757849  | -4.407534 | -3.002536 |
| 146 | H | 0.928753  | -6.144574 | -3.192626 |
| 147 | C | -1.060710 | -5.506041 | -2.651009 |
| 148 | H | 8.411420  | -4.803167 | 4.151535  |
| 149 | H | 7.845284  | -3.151249 | 4.330810  |
| 150 | C | 7.825244  | -4.289192 | 6.160204  |
| 151 | H | -1.361689 | -6.465647 | -2.208144 |
| 152 | H | -1.526355 | -4.726636 | -2.033356 |
| 153 | C | -1.593932 | -5.412427 | -4.075228 |
| 154 | H | 7.630291  | -5.322949 | 6.475984  |
| 155 | H | 7.062513  | -3.673105 | 6.655400  |
| 156 | C | 9.210496  | -3.863882 | 6.631057  |
| 157 | H | -1.180295 | -6.206273 | -4.707397 |
| 158 | H | -2.684698 | -5.499565 | -4.100866 |
| 159 | H | -1.328118 | -4.453261 | -4.533778 |
| 160 | H | 9.418566  | -2.823334 | 6.357488  |
| 161 | H | 9.309828  | -3.947829 | 7.717793  |
| 162 | H | 9.990149  | -4.485545 | 6.176753  |

**Table S16.** Cartesian coordinates of the optimized T<sub>1</sub> geometry of **6** computed by

DFT/CPCM.

|    |    |           |           |           |     |   |           |            |           |
|----|----|-----------|-----------|-----------|-----|---|-----------|------------|-----------|
| 1  | C  | 8.158149  | 1.256570  | 0.857596  | 63  | C | -4.135218 | -3.555456  | 0.655105  |
| 2  | C  | 9.523011  | 1.338782  | 0.909182  | 64  | H | -2.609454 | -2.553201  | -0.462308 |
| 3  | C  | 10.300356 | 0.369660  | 0.215545  | 65  | C | -5.732346 | -2.057424  | 1.774387  |
| 4  | C  | 9.641075  | -0.653755 | -0.509871 | 66  | H | -5.384234 | 0.061894   | 1.539542  |
| 5  | C  | 8.240969  | -0.730821 | -0.558195 | 67  | C | -5.263487 | -3.363109  | 1.460328  |
| 6  | H  | 12.392383 | 0.961989  | 0.627260  | 68  | H | -3.789382 | -4.547206  | 0.383819  |
| 7  | H  | 10.012812 | 2.127846  | 1.468132  | 69  | C | -6.901784 | -2.231609  | 2.602278  |
| 8  | C  | 11.717394 | 0.268791  | 0.136996  | 70  | C | -7.082562 | -3.627320  | 2.744345  |
| 9  | C  | 12.141151 | -0.785502 | -0.615443 | 71  | C | -7.791170 | -1.350291  | 3.220131  |
| 10 | H  | 13.154062 | -1.091540 | -0.838013 | 72  | C | -8.138919 | -4.156213  | 3.485808  |
| 11 | C  | 7.201154  | 2.159367  | 1.505439  | 73  | C | -8.842288 | -1.871447  | 3.963079  |
| 12 | C  | 5.827320  | 1.864906  | 1.301746  | 74  | H | -7.663800 | -0.276080  | 3.120617  |
| 13 | C  | 7.604850  | 3.252381  | 2.283042  | 75  | C | -9.010233 | -3.258345  | 4.091239  |
| 14 | C  | 4.915622  | 2.715258  | 1.912399  | 76  | H | -8.284775 | -5.226732  | 3.588803  |
| 15 | C  | 6.633895  | 4.050166  | 2.856258  | 77  | H | -9.543717 | -1.201022  | 4.449714  |
| 16 | H  | 8.649716  | 3.490352  | 2.448453  | 78  | H | -9.841571 | -3.642174  | 4.675117  |
| 17 | C  | 5.277716  | 3.808228  | 2.689958  | 79  | N | -6.218037 | 4.128379   | -2.123069 |
| 18 | C  | 7.376831  | -1.669672 | -1.223075 | 80  | N | -6.075866 | -4.291336  | 2.058569  |
| 19 | C  | 5.968206  | -1.449664 | -1.060050 | 81  | C | -6.164313 | 5.570876   | -1.995823 |
| 20 | C  | 7.832362  | -2.757121 | -1.999626 | 82  | H | -5.115321 | 5.860697   | -1.875397 |
| 21 | C  | 5.113274  | -2.338232 | -1.688945 | 83  | H | -6.495247 | 6.004044   | -2.945684 |
| 22 | C  | 6.908202  | -3.592243 | -2.590252 | 84  | C | -5.955745 | -5.730067  | 1.933643  |
| 23 | H  | 8.882973  | -2.968091 | -2.154705 | 85  | H | -6.282043 | -6.177356  | 2.878593  |
| 24 | C  | 5.536698  | -3.417141 | -2.459283 | 86  | H | -4.893101 | -5.972657  | 1.830140  |
| 25 | Au | 5.561259  | 0.192807  | 0.111683  | 87  | C | -7.005359 | 6.107326   | -0.840341 |
| 26 | C  | 0.987477  | 0.079047  | 0.049496  | 88  | H | -8.046281 | 5.787743   | -0.977027 |
| 27 | C  | 0.252501  | 0.748687  | -0.963393 | 89  | H | -6.659224 | 5.650806   | 0.095814  |
| 28 | C  | 0.259768  | -0.624282 | 1.044622  | 90  | C | -6.936285 | 7.626929   | -0.735673 |
| 29 | C  | -1.120790 | 0.723736  | -0.979167 | 91  | H | -7.274658 | 8.074184   | -1.681055 |
| 30 | H  | 0.796134  | 1.270785  | -1.743530 | 92  | H | -5.889496 | 7.937857   | -0.609731 |
| 31 | C  | -1.113213 | -0.661875 | 1.027609  | 93  | C | -7.769831 | 8.185592   | 0.413114  |
| 32 | H  | 0.807843  | -1.122312 | 1.837285  | 94  | H | -8.816768 | 7.875035   | 0.287418  |
| 33 | H  | -1.665814 | 1.219002  | -1.775425 | 95  | H | -7.432296 | 7.738082   | 1.358699  |
| 34 | H  | -1.653913 | -1.182384 | 1.810592  | 96  | C | -7.704635 | 9.705736   | 0.523502  |
| 35 | N  | 7.548171  | 0.251092  | 0.144647  | 97  | H | -8.040858 | 10.151056  | -0.422528 |
| 36 | N  | -3.218453 | -0.016097 | -0.000265 | 98  | H | -6.657882 | 10.013981  | 0.648278  |
| 37 | C  | -1.834517 | 0.014844  | 0.015828  | 99  | C | -8.540014 | 10.255529  | 1.672882  |
| 38 | S  | 10.814312 | -1.703257 | -1.262480 | 100 | H | -8.475808 | 11.346500  | 1.729899  |
| 39 | C  | 3.615891  | 0.136576  | 0.079697  | 101 | H | -9.596603 | 9.990047   | 1.555744  |
| 40 | C  | 2.383232  | 0.111095  | 0.066459  | 102 | H | -8.203510 | 9.851819   | 2.634305  |
| 41 | C  | -3.956643 | 1.071896  | -0.521512 | 103 | C | -6.753632 | -6.303974  | 0.765600  |
| 42 | C  | -3.576658 | 2.390959  | -0.191546 | 104 | H | -7.809475 | -6.029359  | 0.884452  |
| 43 | C  | -5.066237 | 0.829188  | -1.337618 | 105 | H | -6.412054 | -5.834407  | -0.165746 |
| 44 | C  | -4.277013 | 3.479140  | -0.678202 | 106 | C | -6.617567 | -7.819378  | 0.665682  |
| 45 | H  | -2.732759 | 2.545477  | 0.472740  | 107 | H | -6.952479 | -8.279126  | 1.606296  |
| 46 | C  | -5.781464 | 1.911848  | -1.830600 | 108 | H | -5.556416 | -8.085250  | 0.558245  |
| 47 | H  | -5.344372 | -0.189950 | -1.586815 | 109 | C | -7.406697 | -8.415324  | -0.495668 |
| 48 | C  | -5.378000 | 3.236960  | -1.507376 | 110 | H | -8.467910 | -8.149378  | -0.388759 |
| 49 | H  | -3.981891 | 4.485313  | -0.400157 | 111 | H | -7.072274 | -7.955783  | -1.436568 |
| 50 | C  | -6.939857 | 2.034188  | -2.682988 | 112 | C | -7.275049 | -9.931546  | -0.600736 |
| 51 | C  | -7.179769 | 3.420536  | -2.829292 | 113 | H | -7.608386 | -10.388846 | 0.340591  |
| 52 | C  | -7.776136 | 1.114424  | -3.318696 | 114 | H | -6.214155 | -10.195262 | -0.706636 |
| 53 | C  | -8.243407 | 3.902198  | -3.592213 | 115 | C | -8.066273 | -10.518708 | -1.762807 |
| 54 | C  | -8.834068 | 1.588582  | -4.083144 | 116 | H | -7.954768 | -11.606071 | -1.815674 |
| 55 | H  | -7.603028 | 0.046908  | -3.216282 | 117 | H | -9.135069 | -10.298197 | -1.664644 |
| 56 | C  | -9.061211 | 2.966672  | -4.215019 | 118 | H | -7.730604 | -10.103031 | -2.719406 |
| 57 | H  | -8.434985 | 4.965211  | -3.698138 | 119 | H | 4.530234  | 4.445359   | 3.148034  |
| 58 | H  | -9.494707 | 0.887800  | -4.583887 | 120 | H | 4.829084  | -4.086537  | -2.933172 |
| 59 | H  | -9.896841 | 3.313313  | -4.815786 | 121 | F | 7.349802  | -4.627125  | -3.329312 |
| 60 | C  | -3.918996 | -1.136222 | 0.504749  | 122 | F | 3.780159  | -2.184459  | -1.573318 |
| 61 | C  | -3.473634 | -2.436829 | 0.183431  | 123 | F | 7.010145  | 5.101747   | 3.604384  |
| 62 | C  | -5.055664 | -0.943652 | 1.296569  | 124 | F | 3.596005  | 2.500750   | 1.765899  |

**Table S17.** Cartesian coordinates of the optimized S<sub>1</sub> geometry of **3** computed by

TDDFT/CPCM.M.

|    |    |            |           |           |     |   |            |           |           |
|----|----|------------|-----------|-----------|-----|---|------------|-----------|-----------|
| 1  | C  | -8.053058  | -1.066589 | -1.006064 | 61  | H | -5.400491  | 4.230799  | 5.511317  |
| 2  | C  | -9.419644  | -1.110094 | -1.045192 | 62  | C | -3.303686  | 4.529180  | 2.782349  |
| 3  | C  | -10.164346 | -0.249907 | -0.186364 | 63  | H | -2.803551  | 3.868018  | 2.064304  |
| 4  | C  | -9.469258  | 0.629416  | 0.687007  | 64  | H | -3.909460  | 5.244372  | 2.211428  |
| 5  | C  | -8.075102  | 0.670324  | 0.723452  | 65  | H | -2.527819  | 5.091046  | 3.321010  |
| 6  | H  | -12.264192 | -0.729110 | -0.657209 | 66  | N | 3.417272   | 0.014493  | 0.000725  |
| 7  | H  | -9.938237  | -1.787785 | -1.718542 | 67  | C | 2.006782   | -0.024800 | -0.024690 |
| 8  | C  | -11.571535 | -0.134574 | -0.067342 | 68  | S | -10.612456 | 1.572473  | 1.629300  |
| 9  | C  | -11.971976 | 0.789535  | 0.853873  | 69  | C | -3.436631  | -0.158932 | -0.119393 |
| 10 | H  | -12.976596 | 1.072841  | 1.138963  | 70  | C | -2.210755  | -0.137636 | -0.104626 |
| 11 | C  | -7.116071  | -1.868284 | -1.807599 | 71  | C | 4.081231   | 1.248488  | 0.084025  |
| 12 | C  | -5.728900  | -1.650495 | -1.595467 | 72  | C | 3.567440   | 2.364780  | -0.617003 |
| 13 | C  | -7.519258  | -2.814413 | -2.748500 | 73  | C | 5.247397   | 1.364897  | 0.855947  |
| 14 | C  | -4.814558  | -2.390691 | -2.335834 | 74  | C | 4.193845   | 3.591897  | -0.561704 |
| 15 | C  | -6.580301  | -3.540367 | -3.474860 | 75  | H | 2.679244   | 2.235794  | -1.229264 |
| 16 | H  | -8.579256  | -2.996033 | -2.925724 | 76  | C | 5.885268   | 2.590489  | 0.919148  |
| 17 | C  | -5.208799  | -3.345317 | -3.285406 | 77  | H | 5.620872   | 0.506450  | 1.409677  |
| 18 | H  | -3.750360  | -2.215783 | -2.165365 | 78  | C | 5.352636   | 3.705560  | 0.215564  |
| 19 | H  | -6.937207  | -4.268568 | -4.199018 | 79  | H | 3.801092   | 4.434819  | -1.124085 |
| 20 | C  | -7.171461  | 1.473141  | 1.519452  | 80  | C | 7.069389   | 3.062368  | 1.597694  |
| 21 | C  | -5.768995  | 1.268910  | 1.311139  | 81  | C | 7.198751   | 4.428408  | 1.267923  |
| 22 | C  | -7.559249  | 2.428894  | 2.471964  | 82  | C | 8.011497   | 2.458266  | 2.428169  |
| 23 | C  | -4.855220  | 2.009162  | 2.044305  | 83  | C | 8.254910   | 5.201438  | 1.741105  |
| 24 | C  | -6.614726  | 3.153468  | 3.189432  | 84  | C | 9.064966   | 3.224174  | 2.910019  |
| 25 | H  | -8.611171  | 2.623968  | 2.670125  | 85  | H | 7.923388   | 1.406317  | 2.692199  |
| 26 | C  | -5.242559  | 2.965939  | 2.997756  | 86  | C | 9.182171   | 4.577421  | 2.567346  |
| 27 | H  | -3.791976  | 1.834482  | 1.866589  | 87  | H | 8.358838   | 6.250994  | 1.476169  |
| 28 | H  | -6.972533  | 3.880814  | 3.914595  | 88  | H | 9.809517   | 2.770669  | 3.558804  |
| 29 | Au | -5.420832  | -0.183906 | -0.136196 | 89  | H | 10.018552  | 5.154381  | 2.953921  |
| 30 | C  | -0.796564  | -0.102269 | -0.078733 | 90  | C | 4.149399   | -1.182497 | -0.061361 |
| 31 | C  | -0.114782  | 0.781611  | 0.782629  | 91  | C | 3.677663   | -2.323193 | 0.629403  |
| 32 | C  | -0.034781  | -0.946741 | -0.911633 | 92  | C | 5.338438   | -1.238197 | -0.804013 |
| 33 | C  | 1.264495   | 0.822831  | 0.810894  | 93  | C | 4.368234   | -3.516230 | 0.591736  |
| 34 | H  | -0.696715  | 1.424470  | 1.438451  | 94  | H | 2.768955   | -2.240059 | 1.219167  |
| 35 | C  | 1.344786   | -0.911750 | -0.886756 | 95  | C | 6.040440   | -2.429242 | -0.849746 |
| 36 | H  | -0.554414  | -1.620115 | -1.588884 | 96  | H | 5.680218   | -0.361861 | -1.350190 |
| 37 | H  | 1.783202   | 1.491137  | 1.494016  | 97  | C | 5.549205   | -3.570213 | -0.157867 |
| 38 | H  | 1.925355   | -1.549359 | -1.549089 | 98  | H | 4.006581   | -4.377990 | 1.146392  |
| 39 | N  | -7.418862  | -0.200348 | -0.145274 | 99  | C | 7.262639   | -2.839707 | -1.499952 |
| 40 | C  | -4.146614  | -4.120899 | -4.061531 | 100 | C | 7.453444   | -4.197770 | -1.166950 |
| 41 | C  | -3.268059  | -4.906459 | -3.080755 | 101 | C | 8.191894   | -2.187833 | -2.308544 |
| 42 | H  | -2.760931  | -4.245586 | -2.367831 | 102 | C | 8.557804   | -4.915942 | -1.616025 |
| 43 | H  | -3.870814  | -5.620305 | -2.505026 | 103 | C | 9.293533   | -2.898919 | -2.766067 |
| 44 | H  | -2.497738  | -5.470341 | -3.624787 | 104 | H | 8.056732   | -1.141394 | -2.574629 |
| 45 | C  | -4.755563  | -5.113603 | -5.049661 | 105 | C | 9.470973   | -4.245032 | -2.420907 |
| 46 | H  | -5.376315  | -4.610419 | -5.801800 | 106 | H | 8.708395   | -5.959199 | -1.348644 |
| 47 | H  | -3.954925  | -5.643918 | -5.580881 | 107 | H | 10.028908  | -2.407623 | -3.397568 |
| 48 | H  | -5.372695  | -5.866143 | -4.542613 | 108 | H | 10.343918  | -4.778687 | -2.788364 |
| 49 | C  | -3.272467  | -3.140360 | -4.852263 | 109 | N | 6.138622   | 4.802648  | 0.446073  |
| 50 | H  | -3.878431  | -2.568147 | -5.566182 | 110 | N | 6.395358   | -4.625891 | -0.369368 |
| 51 | H  | -2.765193  | -2.424270 | -4.194970 | 111 | C | 5.974333   | 6.108321  | -0.166357 |
| 52 | H  | -2.502381  | -3.684145 | -5.416666 | 112 | H | 4.899934   | 6.292005  | -0.297253 |
| 53 | C  | -4.177556  | 3.742591  | 3.766594  | 113 | H | 6.328561   | 6.863648  | 0.547433  |
| 54 | C  | -3.296652  | 2.765580  | 4.554356  | 114 | C | 6.281644   | -5.939234 | 0.238036  |
| 55 | H  | -3.897284  | 2.195616  | 5.274593  | 115 | H | 5.214739   | -6.174016 | 0.347089  |
| 56 | H  | -2.796242  | 2.046350  | 3.894715  | 116 | H | 6.685597   | -6.675633 | -0.469133 |
| 57 | H  | -2.520731  | 3.309813  | 5.110714  | 117 | C | 6.994935   | -6.028357 | 1.578162  |
| 58 | C  | -4.783626  | 4.735056  | 4.756674  | 118 | H | 8.054899   | -5.765874 | 1.438898  |
| 59 | H  | -3.982271  | 5.268170  | 5.284313  | 119 | H | 6.576601   | -5.270083 | 2.258135  |
| 60 | H  | -5.405333  | 5.484957  | 4.251254  | 120 | C | 6.876251   | -7.409894 | 2.200508  |



|     |   |          |           |           |
|-----|---|----------|-----------|-----------|
| 121 | H | 5.812082 | -7.666967 | 2.327249  |
| 122 | H | 7.287136 | -8.162230 | 1.507850  |
| 123 | C | 7.585625 | -7.515228 | 3.541057  |
| 124 | H | 8.649719 | -7.257558 | 3.413140  |
| 125 | H | 7.175966 | -6.760716 | 4.232349  |
| 126 | C | 7.471742 | -8.894162 | 4.173060  |
| 127 | H | 6.407994 | -9.147168 | 4.298361  |
| 128 | H | 7.879031 | -9.644435 | 3.478390  |
| 129 | C | 8.187107 | -8.982946 | 5.510421  |
| 130 | H | 7.775012 | -8.259852 | 6.225584  |
| 131 | H | 8.099188 | -9.978911 | 5.957064  |
| 132 | H | 9.256026 | -8.760550 | 5.400104  |
| 133 | C | 6.709994 | 6.229637  | -1.491827 |
| 134 | H | 7.777412 | 6.013840  | -1.330898 |
| 135 | H | 6.339362 | 5.454191  | -2.180066 |
| 136 | C | 6.543765 | 7.605116  | -2.116660 |
| 137 | H | 5.472092 | 7.817339  | -2.261798 |
| 138 | H | 6.910672 | 8.373726  | -1.417219 |
| 139 | C | 7.271125 | 7.740607  | -3.444815 |
| 140 | H | 8.342140 | 7.524276  | -3.299180 |
| 141 | H | 6.902959 | 6.972028  | -4.143915 |
| 142 | C | 7.114499 | 9.115268  | -4.076945 |
| 143 | H | 6.043960 | 9.327894  | -4.218391 |
| 144 | H | 7.482160 | 9.879256  | -3.375168 |
| 145 | C | 7.846529 | 9.233473  | -5.402965 |
| 146 | H | 7.472538 | 8.497199  | -6.125581 |
| 147 | H | 7.728676 | 10.226490 | -5.849279 |
| 148 | H | 8.921139 | 9.050522  | -5.276546 |

**Table S18.** Cartesian coordinates of the optimized S<sub>1</sub> geometry of **5** computed by TDDFT/CPCM.

|    |    |            |           |           |     |   |           |           |           |
|----|----|------------|-----------|-----------|-----|---|-----------|-----------|-----------|
| 1  | C  | -7.635893  | -1.475708 | -0.567143 | 61  | C | 6.769395  | 5.861063  | 1.664493  |
| 2  | C  | -8.999131  | -1.580311 | -0.578010 | 62  | C | 4.911472  | 7.345116  | 0.146679  |
| 3  | C  | -9.776242  | -0.490774 | -0.092432 | 63  | H | 2.171524  | 6.261460  | -0.641993 |
| 4  | C  | -9.122200  | 0.669242  | 0.391321  | 64  | H | 1.885761  | 4.554818  | -0.936267 |
| 5  | C  | -7.724840  | 0.767656  | 0.402278  | 65  | C | 2.075050  | 5.054183  | 1.144853  |
| 6  | H  | -11.856203 | -1.186067 | -0.345806 | 66  | H | 3.780679  | 6.220507  | -2.445061 |
| 7  | H  | -9.491547  | -2.474679 | -0.949230 | 67  | H | 3.479519  | 4.504148  | -2.679984 |
| 8  | C  | -11.190212 | -0.391935 | -0.020208 | 68  | C | 5.565289  | 5.039682  | -2.686545 |
| 9  | C  | -11.625983 | 0.791451  | 0.495251  | 69  | C | 6.796839  | 7.250731  | 1.675800  |
| 10 | H  | -12.641811 | 1.125792  | 0.660836  | 70  | H | 7.485090  | 5.288851  | 2.251705  |
| 11 | C  | -6.676003  | -2.490274 | -1.026806 | 71  | C | 5.875630  | 7.985940  | 0.925538  |
| 12 | C  | -5.300127  | -2.163110 | -0.913070 | 72  | H | 4.199475  | 7.927352  | -0.437066 |
| 13 | C  | -7.089505  | -3.718721 | -1.552830 | 73  | H | 2.500011  | 4.109096  | 1.522081  |
| 14 | C  | -4.399035  | -3.123000 | -1.347103 | 74  | H | 2.512333  | 5.849960  | 1.767834  |
| 15 | C  | -6.127122  | -4.620085 | -1.964889 | 75  | C | 0.565070  | 5.018946  | 1.327497  |
| 16 | H  | -8.138259  | -3.986998 | -1.649147 | 76  | H | 6.234973  | 5.766405  | -2.200503 |
| 17 | C  | -4.769808  | -4.352661 | -1.875251 | 77  | H | 5.943593  | 4.043084  | -2.407184 |
| 18 | C  | -6.864038  | 1.836376  | 0.842261  | 78  | C | 5.654845  | 5.204691  | -4.195959 |
| 19 | C  | -5.451599  | 1.625470  | 0.691177  | 79  | H | 7.539389  | 7.771980  | 2.274673  |
| 20 | C  | -7.332796  | 3.044902  | 1.398315  | 80  | H | 5.911972  | 9.072417  | 0.949614  |
| 21 | C  | -4.614545  | 2.646609  | 1.096950  | 81  | H | 0.126443  | 5.968236  | 0.979270  |
| 22 | C  | -6.422817  | 4.007378  | 1.780889  | 82  | H | 0.142461  | 4.237389  | 0.672710  |
| 23 | H  | -8.386122  | 3.258581  | 1.547931  | 83  | C | 0.130785  | 4.750703  | 2.759133  |
| 24 | C  | -5.051476  | 3.849762  | 1.644550  | 84  | H | 5.272540  | 6.198995  | -4.479392 |
| 25 | Au | -5.031694  | -0.248696 | -0.109554 | 85  | H | 4.986992  | 4.477177  | -4.685948 |
| 26 | C  | -0.422637  | -0.088016 | -0.079833 | 86  | C | 7.066863  | 5.035260  | -4.732871 |
| 27 | C  | 0.247344   | 0.811327  | 0.778205  | 87  | H | 0.549054  | 3.783973  | 3.090107  |
| 28 | C  | 0.346677   | -0.930334 | -0.911679 | 88  | H | 0.568373  | 5.509093  | 3.429365  |
| 29 | C  | 1.623061   | 0.870345  | 0.803669  | 89  | C | -1.381312 | 4.731566  | 2.929204  |
| 30 | H  | -0.346096  | 1.451558  | 1.427456  | 90  | H | 7.734640  | 5.763849  | -4.244175 |
| 31 | C  | 1.723014   | -0.879185 | -0.887602 | 91  | H | 7.450738  | 4.041440  | -4.448325 |
| 32 | H  | -0.169915  | -1.615713 | -1.580417 | 92  | C | 7.160379  | 5.198448  | -6.242322 |
| 33 | H  | 2.131065   | 1.546778  | 1.487843  | 93  | H | -1.787301 | 5.709118  | 2.624585  |
| 34 | H  | 2.307984   | -1.512286 | -1.551526 | 94  | H | -1.818271 | 3.997017  | 2.235900  |
| 35 | N  | -7.034673  | -0.336173 | -0.091889 | 95  | C | -1.811464 | 4.413625  | 4.351180  |
| 36 | N  | 3.782922   | 0.079192  | -0.004439 | 96  | H | 6.774987  | 6.190656  | -6.522331 |
| 37 | C  | 2.379504   | 0.024137  | -0.029583 | 97  | H | 6.491824  | 4.470113  | -6.726245 |
| 38 | S  | -10.304139 | 1.850180  | 0.918911  | 98  | C | 8.577479  | 5.027131  | -6.762866 |
| 39 | C  | -3.052612  | -0.175317 | -0.110190 | 99  | H | -1.423205 | 5.156793  | 5.059574  |
| 40 | C  | -1.829343  | -0.141098 | -0.101519 | 100 | H | -2.902334 | 4.393792  | 4.451404  |
| 41 | H  | -4.028147  | -5.077179 | -2.199568 | 101 | H | -1.433177 | 3.432275  | 4.665161  |
| 42 | H  | -4.353975  | 4.627499  | 1.940135  | 102 | H | 8.969207  | 4.031915  | -6.516636 |
| 43 | F  | -6.881436  | 5.153386  | 2.308415  | 103 | H | 8.633326  | 5.146481  | -7.850163 |
| 44 | F  | -3.279874  | 2.514786  | 0.966046  | 104 | H | 9.253619  | 5.764536  | -6.311793 |
| 45 | F  | -6.514466  | -5.799689 | -2.470040 | 105 | C | 4.521488  | -1.109560 | -0.137962 |
| 46 | F  | -3.077675  | -2.885544 | -1.264296 | 106 | C | 5.677165  | -1.135900 | -0.938175 |
| 47 | C  | 4.423528   | 1.318744  | 0.160004  | 107 | C | 4.049822  | -2.280861 | 0.479627  |
| 48 | C  | 5.549488   | 1.424746  | 0.995860  | 108 | C | 6.328844  | -2.334481 | -1.179198 |
| 49 | C  | 3.882451   | 2.457741  | -0.461748 | 109 | H | 6.016106  | -0.217242 | -1.410446 |
| 50 | C  | 6.099219   | 2.666653  | 1.268003  | 110 | C | 4.696926  | -3.467783 | 0.227923  |
| 51 | H  | 5.943319   | 0.529634  | 1.470664  | 111 | H | 3.170512  | -2.236648 | 1.120579  |
| 52 | C  | 4.427277   | 3.687785  | -0.177795 | 112 | C | 5.821562  | -3.509376 | -0.619489 |
| 53 | H  | 3.029610   | 2.354274  | -1.130913 | 113 | H | 7.197537  | -2.356400 | -1.833176 |
| 54 | C  | 5.519347   | 3.805762  | 0.704526  | 114 | C | 4.317258  | -4.853235 | 0.702453  |
| 55 | H  | 6.943517   | 2.747592  | 1.948707  | 115 | C | 6.220974  | -4.899909 | -0.776942 |
| 56 | C  | 3.955189   | 5.045583  | -0.649325 | 116 | C | 5.332990  | -5.700764 | -0.035850 |
| 57 | C  | 5.804266   | 5.220558  | 0.888551  | 117 | C | 2.861899  | -5.179629 | 0.320519  |
| 58 | C  | 4.878419   | 5.959754  | 0.129874  | 118 | C | 4.472380  | -4.994306 | 2.230220  |
| 59 | C  | 2.467472   | 5.253215  | -0.311990 | 119 | C | 7.255651  | -5.472018 | -1.515712 |
| 60 | C  | 4.146536   | 5.218163  | -2.169937 | 120 | C | 5.474302  | -7.079387 | -0.032322 |

|     |   |           |           |           |
|-----|---|-----------|-----------|-----------|
| 121 | H | 2.631972  | -6.202381 | 0.658302  |
| 122 | H | 2.207790  | -4.517984 | 0.912358  |
| 123 | C | 2.506944  | -5.033163 | -1.152039 |
| 124 | H | 4.180511  | -6.020388 | 2.506399  |
| 125 | H | 3.733585  | -4.332079 | 2.710316  |
| 126 | C | 5.854716  | -4.695599 | 2.788402  |
| 127 | C | 7.391290  | -6.855428 | -1.507246 |
| 128 | H | 7.942353  | -4.852651 | -2.089590 |
| 129 | C | 6.508238  | -7.651923 | -0.773924 |
| 130 | H | 4.792355  | -7.708656 | 0.538394  |
| 131 | H | 2.877249  | -4.066853 | -1.532822 |
| 132 | H | 3.020230  | -5.806382 | -1.744676 |
| 133 | C | 1.005646  | -5.107540 | -1.386588 |
| 134 | H | 6.597508  | -5.365866 | 2.328089  |
| 135 | H | 6.156976  | -3.672115 | 2.513594  |
| 136 | C | 5.911783  | -4.845931 | 4.300928  |
| 137 | H | 8.189761  | -7.323756 | -2.077203 |
| 138 | H | 6.629806  | -8.732439 | -0.781964 |
| 139 | H | 0.621471  | -6.078053 | -1.032405 |
| 140 | H | 0.507088  | -4.344196 | -0.764531 |
| 141 | C | 0.606299  | -4.899313 | -2.838136 |
| 142 | H | 5.607341  | -5.868157 | 4.579426  |
| 143 | H | 5.169645  | -4.176240 | 4.765831  |
| 144 | C | 7.287239  | -4.554177 | 4.878592  |
| 145 | H | 0.968152  | -3.912413 | -3.176045 |
| 146 | H | 1.119932  | -5.638375 | -3.475132 |
| 147 | C | -0.896020 | -4.990462 | -3.062156 |
| 148 | H | 8.029680  | -5.223280 | 4.413079  |
| 149 | H | 7.592288  | -3.531467 | 4.601002  |
| 150 | C | 7.349615  | -4.705876 | 6.390845  |
| 151 | H | -1.244864 | -5.986342 | -2.746506 |
| 152 | H | -1.408056 | -4.272137 | -2.404400 |
| 153 | C | -1.293232 | -4.737404 | -4.506597 |
| 154 | H | 7.044095  | -5.727491 | 6.663635  |
| 155 | H | 6.605889  | -4.037945 | 6.851652  |
| 156 | C | 8.730218  | -4.410491 | 6.952185  |
| 157 | H | -0.825757 | -5.466789 | -5.180625 |
| 158 | H | -2.377968 | -4.799419 | -4.648034 |
| 159 | H | -0.974316 | -3.738915 | -4.832112 |
| 160 | H | 9.040467  | -3.385080 | 6.713815  |
| 161 | H | 8.764078  | -4.523143 | 8.041101  |
| 162 | H | 9.481417  | -5.086335 | 6.524010  |

**Table S19.** Cartesian coordinates of the optimized S<sub>1</sub> geometry of **6** computed by TDDFT/CPCM.

|    |    |            |           |           |     |   |            |            |           |
|----|----|------------|-----------|-----------|-----|---|------------|------------|-----------|
| 1  | C  | 8.091965   | -0.878451 | 1.245370  | 63  | C | -4.186058  | -3.574834  | -0.169170 |
| 2  | C  | 9.454239   | -0.950749 | 1.340564  | 64  | H | -2.616404  | -2.342436  | -0.939832 |
| 3  | C  | 10.248245  | -0.281843 | 0.366283  | 65  | C | -5.905735  | -2.363934  | 1.108580  |
| 4  | C  | 9.610137   | 0.439145  | -0.673321 | 66  | H | -5.608830  | -0.241183  | 1.349643  |
| 5  | C  | 8.213912   | 0.508010  | -0.762183 | 67  | C | -5.373770  | -3.568470  | 0.571916  |
| 6  | H  | 12.317574  | -0.725392 | 0.992588  | 68  | H | -3.792878  | -4.488706  | -0.606473 |
| 7  | H  | 9.933366   | -1.506419 | 2.141634  | 69  | C | -7.122626  | -2.725236  | 1.797293  |
| 8  | C  | 11.663554  | -0.230248 | 0.280234  | 70  | C | -7.269329  | -4.120060  | 1.639916  |
| 9  | C  | 12.117602  | 0.497679  | -0.778492 | 71  | C | -8.079500  | -2.004540  | 2.509488  |
| 10 | H  | 13.138473  | 0.697721  | -1.076486 | 72  | C | -8.356093  | -4.808887  | 2.170160  |
| 11 | C  | 7.118532   | -1.502292 | 2.153489  | 73  | C | -9.164241  | -2.685169  | 3.046995  |
| 12 | C  | 5.745630   | -1.294460 | 1.859680  | 74  | H | -7.978503  | -0.928983  | 2.640250  |
| 13 | C  | 7.523016   | -2.265061 | 3.254131  | 75  | C | -9.297612  | -4.069155  | 2.876186  |
| 14 | C  | 4.836802   | -1.889165 | 2.722393  | 76  | H | -8.472310  | -5.882056  | 2.038330  |
| 15 | C  | 6.553426   | -2.822454 | 4.064118  | 77  | H | -9.920563  | -2.140146  | 3.605472  |
| 16 | H  | 8.570022   | -2.433173 | 3.492023  | 78  | H | -10.157957 | -4.578312  | 3.303267  |
| 17 | C  | 5.199303   | -2.652925 | 3.824774  | 79  | N | -6.096769  | 4.706155   | -1.011195 |
| 18 | C  | 7.368601   | 1.173915  | -1.720869 | 80  | N | -6.190489  | -4.613695  | 0.910841  |
| 19 | C  | 5.951326   | 1.043945  | -1.527590 | 81  | C | -5.916606  | 6.083188   | -0.589414 |
| 20 | C  | 7.860829   | 1.924844  | -2.808354 | 82  | H | -4.839214  | 6.276418   | -0.504680 |
| 21 | C  | 5.131517   | 1.677408  | -2.441815 | 83  | H | -6.280986  | 6.734081   | -1.395127 |
| 22 | C  | 6.967431   | 2.522728  | -3.671244 | 84  | C | -6.023949  | -5.992917  | 0.490831  |
| 23 | H  | 8.919438   | 2.059623  | -3.004597 | 85  | H | -6.412382  | -6.638770  | 1.289369  |
| 24 | C  | 5.592800   | 2.423394  | -3.523789 | 86  | H | -4.948294  | -6.202522  | 0.424864  |
| 25 | Au | 5.500368   | -0.110028 | 0.146772  | 87  | C | -6.626039  | 6.394672   | 0.719162  |
| 26 | C  | 0.878492   | -0.016369 | 0.034265  | 88  | H | -7.697677  | 6.167694   | 0.610314  |
| 27 | C  | 0.179449   | 0.715081  | -0.944917 | 89  | H | -6.246244  | 5.720759   | 1.502659  |
| 28 | C  | 0.140324   | -0.732908 | 0.995956  | 90  | C | -6.438389  | 7.843106   | 1.139597  |
| 29 | C  | -1.201857  | 0.731612  | -0.964502 | 91  | H | -6.812031  | 8.508205   | 0.344168  |
| 30 | H  | 0.748841   | 1.256725  | -1.695849 | 92  | H | -5.362559  | 8.062620   | 1.234505  |
| 31 | C  | -1.240892  | -0.721575 | 0.980828  | 93  | C | -7.139780  | 8.174595   | 2.447082  |
| 32 | H  | 0.681483   | -1.285205 | 1.759938  | 94  | H | -8.215528  | 7.953823   | 2.351845  |
| 33 | H  | -1.738288  | 1.280040  | -1.735313 | 95  | H | -6.766612  | 7.508503   | 3.242101  |
| 34 | H  | -1.807790  | -1.259139 | 1.737376  | 96  | C | -6.956666  | 9.623028   | 2.874011  |
| 35 | N  | 7.506512   | -0.170882 | 0.225941  | 97  | H | -7.328345  | 10.284130  | 2.076391  |
| 36 | N  | -3.336107  | 0.024714  | -0.019009 | 98  | H | -5.881422  | 9.838914   | 2.966171  |
| 37 | C  | -1.920920  | 0.011995  | -0.000774 | 99  | C | -7.663216  | 9.939285   | 4.181279  |
| 38 | S  | 10.810289  | 1.159845  | -1.728049 | 100 | H | -7.525089  | 10.983858  | 4.479582  |
| 39 | C  | 3.516330   | -0.055174 | 0.078764  | 101 | H | -8.742101  | 9.756050   | 4.099594  |
| 40 | C  | 2.295263   | -0.033610 | 0.054027  | 102 | H | -7.285222  | 9.307864   | 4.995298  |
| 41 | C  | -4.015728  | 1.231321  | -0.239316 | 103 | C | -6.714775  | -6.292973  | -0.830290 |
| 42 | C  | -3.495339  | 2.429869  | 0.304520  | 104 | H | -7.784856  | -6.051049  | -0.739839 |
| 43 | C  | -5.198257  | 1.245987  | -0.995838 | 105 | H | -6.311945  | -5.623729  | -1.606234 |
| 44 | C  | -4.128803  | 3.637994  | 0.106600  | 106 | C | -6.540106  | -7.743502  | -1.249106 |
| 45 | H  | -2.594086  | 2.382579  | 0.909258  | 107 | H | -6.935663  | -8.404099  | -0.460538 |
| 46 | C  | -5.844071  | 2.451834  | -1.200042 | 108 | H | -5.465936  | -7.977543  | -1.326650 |
| 47 | H  | -5.577135  | 0.324260  | -1.431483 | 109 | C | -7.224468  | -8.064502  | -2.568170 |
| 48 | C  | -5.302817  | 3.649017  | -0.656065 | 110 | H | -8.298717  | -7.830152  | -2.489975 |
| 49 | H  | -3.729289  | 4.546440  | 0.549410  | 111 | H | -6.830094  | -7.402327  | -3.356190 |
| 50 | C  | -7.042897  | 2.830816  | -1.910654 | 112 | C | -7.052901  | -9.514668  | -2.994019 |
| 51 | C  | -7.170555  | 4.228002  | -1.758067 | 113 | H | -7.445310  | -10.171913 | -2.203162 |
| 52 | C  | -7.998592  | 2.123647  | -2.637726 | 114 | H | -5.979124  | -9.743930  | -3.069574 |
| 53 | C  | -8.237429  | 4.932564  | -2.307594 | 115 | C | -7.742741  | -9.820629  | -4.312612 |
| 54 | C  | -9.063542  | 2.819959  | -3.194462 | 116 | H | -7.612893  | -10.866488 | -4.610131 |
| 55 | H  | -7.912058  | 1.046426  | -2.765067 | 117 | H | -8.820421  | -9.624130  | -4.247566 |
| 56 | C  | -9.178351  | 4.206115  | -3.028101 | 118 | H | -7.344247  | -9.192995  | -5.119749 |
| 57 | H  | -8.339285  | 6.007628  | -2.179451 | 119 | H | 4.451070   | -3.098823  | 4.472435  |
| 58 | H  | -9.818702  | 2.285663  | -3.764739 | 120 | H | 4.908320   | 2.902191   | -4.215728 |
| 59 | H  | -10.023446 | 4.727692  | -3.470367 | 121 | F | 7.447466   | 3.235295   | -4.703524 |
| 60 | C  | -4.040706  | -1.171192 | 0.184564  | 122 | F | 3.794964   | 1.596457   | -2.320212 |
| 61 | C  | -3.529672  | -2.376574 | -0.352446 | 123 | F | 6.930296   | -3.555651  | 5.121932  |
| 62 | C  | -5.236971  | -1.168070 | 0.918859  | 124 | F | 3.517917   | -1.743055  | 2.516054  |

**Table S20.** Cartesian coordinates of the optimized T<sub>1</sub> geometry of **3** computed by TDDFT/CPCM.

|    |    |            |           |           |     |   |            |           |           |
|----|----|------------|-----------|-----------|-----|---|------------|-----------|-----------|
| 1  | C  | -8.062635  | -1.085978 | -0.980002 | 61  | H | -5.403865  | 4.360708  | 5.404922  |
| 2  | C  | -9.430341  | -1.129681 | -1.016103 | 62  | C | -3.333690  | 4.626312  | 2.651851  |
| 3  | C  | -10.172913 | -0.249787 | -0.180402 | 63  | H | -2.833966  | 3.956216  | 1.941945  |
| 4  | C  | -9.479765  | 0.651497  | 0.670431  | 64  | H | -3.951747  | 5.324694  | 2.073376  |
| 5  | C  | -8.084704  | 0.692946  | 0.704540  | 65  | H | -2.558397  | 5.205717  | 3.172214  |
| 6  | H  | -12.274578 | -0.741448 | -0.639279 | 66  | N | 3.387428   | 0.017661  | -0.001096 |
| 7  | H  | -9.949519  | -1.824133 | -1.671712 | 67  | C | 1.987550   | -0.018269 | -0.028330 |
| 8  | C  | -11.581760 | -0.132328 | -0.065026 | 68  | S | -10.622598 | 1.617891  | 1.587763  |
| 9  | C  | -11.979481 | 0.814592  | 0.832040  | 69  | C | -3.459542  | -0.152008 | -0.121991 |
| 10 | H  | -12.984461 | 1.104710  | 1.109720  | 70  | C | -2.229203  | -0.128588 | -0.108221 |
| 11 | C  | -7.127493  | -1.906771 | -1.761163 | 71  | C | 4.063381   | 1.251226  | 0.081780  |
| 12 | C  | -5.740155  | -1.684321 | -1.554888 | 72  | C | 3.589276   | 2.355506  | -0.660990 |
| 13 | C  | -7.531611  | -2.875924 | -2.678572 | 73  | C | 5.202777   | 1.368398  | 0.888189  |
| 14 | C  | -4.825952  | -2.444082 | -2.275330 | 74  | C | 4.228051   | 3.578224  | -0.608696 |
| 15 | C  | -6.593105  | -3.619861 | -3.386074 | 75  | H | 2.721308   | 2.222737  | -1.301340 |
| 16 | H  | -8.591603  | -3.061265 | -2.851712 | 76  | C | 5.854722   | 2.588709  | 0.947658  |
| 17 | C  | -5.221079  | -3.421578 | -3.200559 | 77  | H | 5.549810   | 0.514858  | 1.466517  |
| 18 | H  | -3.761674  | -2.266751 | -2.108553 | 78  | C | 5.359790   | 3.694350  | 0.204958  |
| 19 | H  | -6.950069  | -4.365255 | -4.092368 | 79  | H | 3.865314   | 4.413579  | -1.202010 |
| 20 | C  | -7.181283  | 1.516962  | 1.480059  | 80  | C | 7.023230   | 3.059110  | 1.652668  |
| 21 | C  | -5.779961  | 1.310617  | 1.272729  | 81  | C | 7.181696   | 4.416826  | 1.299587  |
| 22 | C  | -7.570636  | 2.493294  | 2.410557  | 82  | C | 7.930577   | 2.459882  | 2.524952  |
| 23 | C  | -4.865973  | 2.072016  | 1.984608  | 83  | C | 8.234176   | 5.184496  | 1.790990  |
| 24 | C  | -6.626910  | 3.237491  | 3.107580  | 84  | C | 8.979027   | 3.220683  | 3.024568  |
| 25 | H  | -8.622567  | 2.688972  | 2.607814  | 85  | H | 7.819129   | 1.414704  | 2.806771  |
| 26 | C  | -5.254293  | 3.049723  | 2.915149  | 86  | C | 9.125883   | 4.565270  | 2.658453  |
| 27 | H  | -3.802755  | 1.897047  | 1.807820  | 87  | H | 8.361348   | 6.226920  | 1.508247  |
| 28 | H  | -6.984407  | 3.980334  | 3.816765  | 88  | H | 9.696603   | 2.770583  | 3.705449  |
| 29 | Au | -5.433930  | -0.179580 | -0.136045 | 89  | H | 9.957914   | 5.138745  | 3.059606  |
| 30 | C  | -0.824744  | -0.093108 | -0.083590 | 90  | C | 4.126261   | -1.181249 | -0.059666 |
| 31 | C  | -0.137026  | 0.852904  | 0.715692  | 91  | C | 3.681553   | -2.307545 | 0.667928  |
| 32 | C  | -0.057349  | -1.000084 | -0.854519 | 92  | C | 5.294871   | -1.243415 | -0.829344 |
| 33 | C  | 1.237811   | 0.893190  | 0.742004  | 93  | C | 4.377679   | -3.499265 | 0.635017  |
| 34 | H  | -0.718888  | 1.540112  | 1.325005  | 94  | H | 2.788474   | -2.216399 | 1.280462  |
| 35 | C  | 1.317651   | -0.967293 | -0.826723 | 95  | C | 6.004256   | -2.432197 | -0.869221 |
| 36 | H  | -0.577327  | -1.716871 | -1.485357 | 96  | H | 5.619758   | -0.373818 | -1.396538 |
| 37 | H  | 1.755575   | 1.606428  | 1.378532  | 97  | C | 5.537737   | -3.561427 | -0.143819 |
| 38 | H  | 1.897235   | -1.651613 | -1.441340 | 98  | H | 4.036022   | -4.351609 | 1.216561  |
| 39 | N  | -7.429291  | -0.197181 | -0.140571 | 99  | C | 7.213388   | -2.847140 | -1.539708 |
| 40 | C  | -4.159715  | -4.219666 | -3.954589 | 100 | C | 7.421817   | -4.197746 | -1.185321 |
| 41 | C  | -3.294201  | -4.991967 | -2.951940 | 101 | C | 8.118226   | -2.205167 | -2.383795 |
| 42 | H  | -2.787650  | -4.320684 | -2.248428 | 102 | C | 8.520936   | -4.916345 | -1.647863 |
| 43 | H  | -3.906296  | -5.690119 | -2.366915 | 103 | C | 9.213371   | -2.916997 | -2.854619 |
| 44 | H  | -2.524042  | -5.571788 | -3.479040 | 104 | H | 7.968714   | -1.164939 | -2.666373 |
| 45 | C  | -4.769742  | -5.227110 | -4.927025 | 105 | C | 9.409000   | -4.255195 | -2.487714 |
| 46 | H  | -5.383850  | -4.734493 | -5.691525 | 106 | H | 8.685696   | -5.953171 | -1.363923 |
| 47 | H  | -3.969531  | -5.771705 | -5.444124 | 107 | H | 9.929676   | -2.433004 | -3.513227 |
| 48 | H  | -5.393414  | -5.966843 | -4.409280 | 108 | H | 10.276757  | -4.789925 | -2.866031 |
| 49 | C  | -3.272813  | -3.261659 | -4.758665 | 109 | N | 6.154089   | 4.788039  | 0.438410  |
| 50 | H  | -3.869461  | -2.698490 | -5.487449 | 110 | N | 6.387202   | -4.617506 | -0.355587 |
| 51 | H  | -2.762803  | -2.537284 | -4.112734 | 111 | C | 6.028294   | 6.079251  | -0.210792 |
| 52 | H  | -2.504123  | -3.822896 | -5.307493 | 112 | H | 4.960727   | 6.276954  | -0.375126 |
| 53 | C  | -4.190124  | 3.850759  | 3.659854  | 113 | H | 6.375862   | 6.847793  | 0.492285  |
| 54 | C  | -3.292819  | 2.897222  | 4.457815  | 114 | C | 6.296569   | -5.918019 | 0.280651  |
| 55 | H  | -3.881184  | 2.334655  | 5.193795  | 115 | H | 5.233797   | -6.160062 | 0.413838  |
| 56 | H  | -2.789509  | 2.171284  | 3.807916  | 116 | H | 6.694312   | -6.666001 | -0.418078 |
| 57 | H  | -2.518432  | 3.460116  | 4.997207  | 117 | C | 7.033722   | -5.975344 | 1.609596  |
| 58 | C  | -4.796950  | 4.856057  | 4.636435  | 118 | H | 8.089648   | -5.710398 | 1.446158  |
| 59 | H  | -3.995804  | 5.404763  | 5.147970  | 119 | H | 6.623303   | -5.204993 | 2.280772  |
| 60 | H  | -5.428089  | 5.592192  | 4.122587  | 120 | C | 6.933053   | -7.343891 | 2.262894  |

|     |   |          |           |           |
|-----|---|----------|-----------|-----------|
| 121 | H | 5.872357 | -7.603816 | 2.411586  |
| 122 | H | 7.337086 | -8.108623 | 1.579772  |
| 123 | C | 7.663382 | -7.418058 | 3.594264  |
| 124 | H | 8.724179 | -7.158322 | 3.444973  |
| 125 | H | 7.260601 | -6.651153 | 4.275924  |
| 126 | C | 7.565574 | -8.784014 | 4.256347  |
| 127 | H | 6.504975 | -9.039389 | 4.402029  |
| 128 | H | 7.966666 | -9.546663 | 3.571595  |
| 129 | C | 8.300227 | -8.841844 | 5.584951  |
| 130 | H | 7.894774 | -8.105907 | 6.290766  |
| 131 | H | 8.223518 | -9.828732 | 6.053356  |
| 132 | H | 9.366389 | -8.616833 | 5.454919  |
| 133 | C | 6.799364 | 6.156061  | -1.519409 |
| 134 | H | 7.859979 | 5.934570  | -1.324557 |
| 135 | H | 6.438654 | 5.364797  | -2.194839 |
| 136 | C | 6.663198 | 7.514288  | -2.187624 |
| 137 | H | 5.597605 | 7.731643  | -2.366556 |
| 138 | H | 7.019153 | 8.299713  | -1.501261 |
| 139 | C | 7.425323 | 7.605418  | -3.499994 |
| 140 | H | 8.490739 | 7.386757  | -3.320665 |
| 141 | H | 7.069635 | 6.818583  | -4.185146 |
| 142 | C | 7.294447 | 8.961431  | -4.176638 |
| 143 | H | 6.229299 | 9.176254  | -4.351667 |
| 144 | H | 7.649381 | 9.743883  | -3.488765 |
| 145 | C | 8.060594 | 9.035577  | -5.486513 |
| 146 | H | 7.700510 | 8.279733  | -6.195898 |
| 147 | H | 7.960249 | 10.015265 | -5.965450 |
| 148 | H | 9.130512 | 8.850678  | -5.327322 |

**Table S21.** Cartesian coordinates of the optimized T<sub>1</sub> geometry of **5** computed by TDDFT/CPCM.

|    |    |            |           |           |     |   |           |           |           |
|----|----|------------|-----------|-----------|-----|---|-----------|-----------|-----------|
| 1  | C  | -7.646762  | -1.492121 | -0.566804 | 61  | C | 6.753288  | 5.861042  | 1.678320  |
| 2  | C  | -9.009902  | -1.597794 | -0.589414 | 62  | C | 4.936787  | 7.346560  | 0.114398  |
| 3  | C  | -9.793506  | -0.507741 | -0.120674 | 63  | H | 2.195104  | 6.276832  | -0.695342 |
| 4  | C  | -9.147092  | 0.658388  | 0.358851  | 64  | H | 1.899651  | 4.568730  | -0.973973 |
| 5  | C  | -7.750510  | 0.760379  | 0.379646  | 65  | C | 2.072337  | 5.089867  | 1.103238  |
| 6  | H  | -11.870016 | -1.211851 | -0.384806 | 66  | H | 3.825003  | 6.209649  | -2.478417 |
| 7  | H  | -9.496966  | -2.496819 | -0.956670 | 67  | H | 3.510589  | 4.494350  | -2.702839 |
| 8  | C  | -11.208874 | -0.413433 | -0.060081 | 68  | C | 5.600978  | 5.010702  | -2.691271 |
| 9  | C  | -11.651039 | 0.772181  | 0.443225  | 69  | C | 6.794273  | 7.251003  | 1.675652  |
| 10 | H  | -12.669268 | 1.104733  | 0.597907  | 70  | H | 7.453672  | 5.288521  | 2.283563  |
| 11 | C  | -6.682327  | -2.510540 | -1.002726 | 71  | C | 5.893665  | 7.987148  | 0.902510  |
| 12 | C  | -5.308145  | -2.181299 | -0.874515 | 72  | H | 4.239952  | 7.928918  | -0.487445 |
| 13 | C  | -7.088272  | -3.746833 | -1.517087 | 73  | H | 2.486022  | 4.145381  | 1.494401  |
| 14 | C  | -4.400507  | -3.148735 | -1.278106 | 74  | H | 2.510906  | 5.888336  | 1.721785  |
| 15 | C  | -6.120171  | -4.654146 | -1.900468 | 75  | C | 0.560573  | 5.069518  | 1.273025  |
| 16 | H  | -8.135425  | -4.017038 | -1.624596 | 76  | H | 6.272132  | 5.734827  | -2.203438 |
| 17 | C  | -4.763946  | -4.385950 | -1.792445 | 77  | H | 5.966810  | 4.012813  | -2.400300 |
| 18 | C  | -6.896262  | 1.838141  | 0.813174  | 78  | C | 5.707341  | 5.163482  | -4.200856 |
| 19 | C  | -5.483196  | 1.624044  | 0.685266  | 79  | H | 7.531973  | 7.771018  | 2.281713  |
| 20 | C  | -7.373860  | 3.056176  | 1.338879  | 80  | H | 5.940063  | 9.073479  | 0.915588  |
| 21 | C  | -4.651268  | 2.653739  | 1.083528  | 81  | H | 0.133148  | 6.019642  | 0.913282  |
| 22 | C  | -6.469896  | 4.025801  | 1.716941  | 82  | H | 0.136588  | 4.286360  | 0.621065  |
| 23 | H  | -8.429422  | 3.273846  | 1.464868  | 83  | C | 0.112750  | 4.817061  | 2.703389  |
| 24 | C  | -5.096575  | 3.864908  | 1.603171  | 84  | H | 5.337498  | 6.159285  | -4.495500 |
| 25 | Au | -5.053358  | -0.257808 | -0.090405 | 85  | H | 5.037205  | 4.438822  | -4.692050 |
| 26 | C  | -0.456395  | -0.088799 | -0.053058 | 86  | C | 7.122633  | 4.976396  | -4.723118 |
| 27 | C  | 0.219997   | 0.851724  | 0.762658  | 87  | H | 0.523588  | 3.851527  | 3.046961  |
| 28 | C  | 0.315485   | -0.971858 | -0.847787 | 88  | H | 0.549054  | 5.579492  | 3.369813  |
| 29 | C  | 1.592119   | 0.911991  | 0.780756  | 89  | C | -1.400615 | 4.807158  | 2.863067  |
| 30 | H  | -0.371259  | 1.517601  | 1.387140  | 90  | H | 7.792921  | 5.702128  | -4.233624 |
| 31 | C  | 1.688226   | -0.920438 | -0.828227 | 91  | H | 7.494165  | 3.981075  | -4.427665 |
| 32 | H  | -0.202633  | -1.683853 | -1.486605 | 92  | C | 7.231506  | 5.127378  | -6.232804 |
| 33 | H  | 2.100138   | 1.618411  | 1.433527  | 93  | H | -1.800442 | 5.782772  | 2.544497  |
| 34 | H  | 2.269742   | -1.583481 | -1.465088 | 94  | H | -1.836896 | 4.066440  | 2.175782  |
| 35 | N  | -7.051580  | -0.345183 | -0.096212 | 95  | C | -1.840484 | 4.507608  | 4.286179  |
| 36 | N  | 3.747492   | 0.082994  | 0.003027  | 96  | H | 6.858350  | 6.121168  | -6.523637 |
| 37 | C  | 2.352809   | 0.025402  | -0.014626 | 97  | H | 6.560239  | 4.401973  | -6.717409 |
| 38 | S  | -10.336734 | 1.838791  | 0.869903  | 98  | C | 8.651467  | 4.938415  | -6.739291 |
| 39 | C  | -3.082348  | -0.179618 | -0.079197 | 99  | H | -1.452399 | 5.257134  | 4.987903  |
| 40 | C  | -1.855259  | -0.141757 | -0.070512 | 100 | H | -2.931891 | 4.494013  | 4.381549  |
| 41 | H  | -4.017772  | -5.116685 | -2.091616 | 101 | H | -1.468323 | 3.528314  | 4.613587  |
| 42 | H  | -4.403418  | 4.647733  | 1.895819  | 102 | H | 9.031195  | 3.941310  | -6.482161 |
| 43 | F  | -6.935265  | 5.181395  | 2.215395  | 103 | H | 8.718235  | 5.049074  | -7.826907 |
| 44 | F  | -3.315702  | 2.519540  | 0.973546  | 104 | H | 9.330743  | 5.672535  | -6.287567 |
| 45 | F  | -6.499603  | -5.841043 | -2.393682 | 105 | C | 4.496708  | -1.102400 | -0.147548 |
| 46 | F  | -3.080708  | -2.911160 | -1.176115 | 106 | C | 5.627824  | -1.118285 | -0.979017 |
| 47 | C  | 4.393669   | 1.324326  | 0.174684  | 107 | C | 4.058840  | -2.273627 | 0.491135  |
| 48 | C  | 5.501341   | 1.427029  | 1.031432  | 108 | C | 6.290006  | -2.310408 | -1.229731 |
| 49 | C  | 3.875889   | 2.460255  | -0.468369 | 109 | H | 5.943212  | -0.197187 | -1.463036 |
| 50 | C  | 6.057874   | 2.667422  | 1.302990  | 110 | C | 4.712917  | -3.455469 | 0.226419  |
| 51 | H  | 5.880130   | 0.531643  | 1.518153  | 111 | H | 3.197662  | -2.236504 | 1.157022  |
| 52 | C  | 4.424478   | 3.689772  | -0.182484 | 112 | C | 5.814422  | -3.487613 | -0.649252 |
| 53 | H  | 3.035810   | 2.357641  | -1.153984 | 113 | H | 7.142450  | -2.324592 | -1.905145 |
| 54 | C  | 5.499967   | 3.805795  | 0.718244  | 114 | C | 4.359460  | -4.843435 | 0.714253  |
| 55 | H  | 6.891239   | 2.746642  | 1.997426  | 115 | C | 6.229421  | -4.875378 | -0.807250 |
| 56 | C  | 3.970082   | 5.047606  | -0.671578 | 116 | C | 5.370352  | -5.682631 | -0.040493 |
| 57 | C  | 5.795853   | 5.221435  | 0.893241  | 117 | C | 2.901223  | -5.187816 | 0.358853  |
| 58 | C  | 4.890677   | 5.961309  | 0.111738  | 118 | C | 4.542331  | -4.977133 | 2.239137  |
| 59 | C  | 2.480344   | 5.269961  | -0.351756 | 119 | C | 7.253768  | -5.439094 | -1.565533 |
| 60 | C  | 4.178615   | 5.206269  | -2.191009 | 120 | C | 5.530041  | -7.059372 | -0.030784 |

|     |   |           |           |           |
|-----|---|-----------|-----------|-----------|
| 121 | H | 2.688123  | -6.211303 | 0.705551  |
| 122 | H | 2.249996  | -4.529811 | 0.958062  |
| 123 | C | 2.519827  | -5.053303 | -1.108205 |
| 124 | H | 4.267057  | -6.005340 | 2.524584  |
| 125 | H | 3.804663  | -4.321497 | 2.730068  |
| 126 | C | 5.930629  | -4.660580 | 2.772167  |
| 127 | C | 7.408622  | -6.820987 | -1.550644 |
| 128 | H | 7.918832  | -4.814864 | -2.159441 |
| 129 | C | 6.554116  | -7.624061 | -0.791937 |
| 130 | H | 4.869617  | -7.693284 | 0.559969  |
| 131 | H | 2.874086  | -4.085412 | -1.500340 |
| 132 | H | 3.031372  | -5.824173 | -1.705307 |
| 133 | C | 1.015722  | -5.145049 | -1.317353 |
| 134 | H | 6.672423  | -5.325780 | 2.303041  |
| 135 | H | 6.217188  | -3.635682 | 2.486090  |
| 136 | C | 6.014427  | -4.801345 | 4.284351  |
| 137 | H | 8.200327  | -7.282246 | -2.135767 |
| 138 | H | 6.690018  | -8.702939 | -0.795130 |
| 139 | H | 0.648209  | -6.118231 | -0.952902 |
| 140 | H | 0.519209  | -4.384759 | -0.689865 |
| 141 | C | 0.590472  | -4.947308 | -2.763065 |
| 142 | H | 5.723824  | -5.824570 | 4.573920  |
| 143 | H | 5.274084  | -4.135538 | 4.757703  |
| 144 | C | 7.396445  | -4.494012 | 4.837762  |
| 145 | H | 0.937606  | -3.958763 | -3.111353 |
| 146 | H | 1.100897  | -5.684372 | -3.404886 |
| 147 | C | -0.914168 | -5.053629 | -2.963966 |
| 148 | H | 8.137002  | -5.159925 | 4.364756  |
| 149 | H | 7.688226  | -3.470667 | 4.548519  |
| 150 | C | 7.484233  | -4.634988 | 6.349793  |
| 151 | H | -1.248900 | -6.051691 | -2.639992 |
| 152 | H | -1.423924 | -4.337832 | -2.301382 |
| 153 | C | -1.334150 | -4.809135 | -4.403547 |
| 154 | H | 7.191234  | -5.657119 | 6.634219  |
| 155 | H | 6.742634  | -3.969835 | 6.818025  |
| 156 | C | 8.871176  | -4.324978 | 6.887123  |
| 157 | H | -0.869912 | -5.536930 | -5.081481 |
| 158 | H | -2.420138 | -4.880656 | -4.529972 |
| 159 | H | -1.028066 | -3.809217 | -4.736871 |
| 160 | H | 9.169470  | -3.298838 | 6.636904  |
| 161 | H | 8.923235  | -4.429883 | 7.976108  |
| 162 | H | 9.620812  | -4.997824 | 6.451553  |



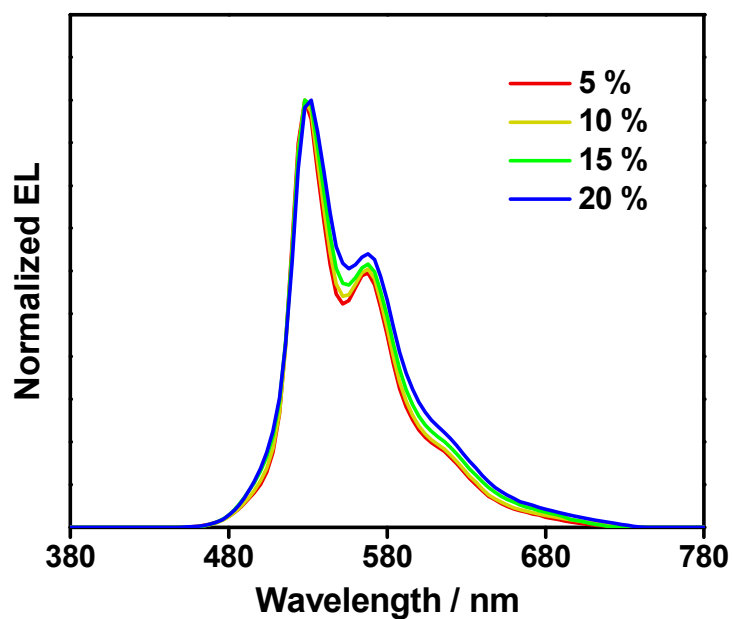

**Figure S26.** Normalized EL spectra of solution-processed devices made with **1** at a luminance of  $100 \text{ cd m}^{-2}$ .

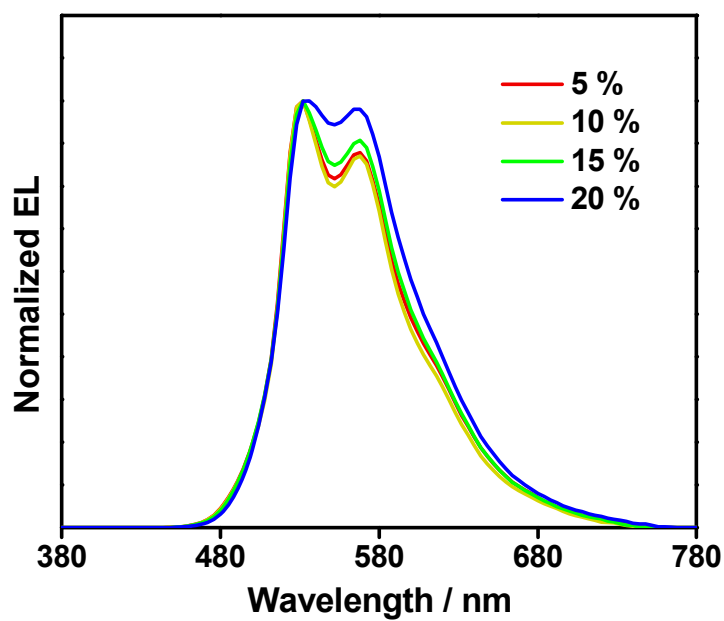

**Figure S27.** Normalized EL spectra of solution-processed devices made with **2** at a luminance of  $100 \text{ cd m}^{-2}$ .

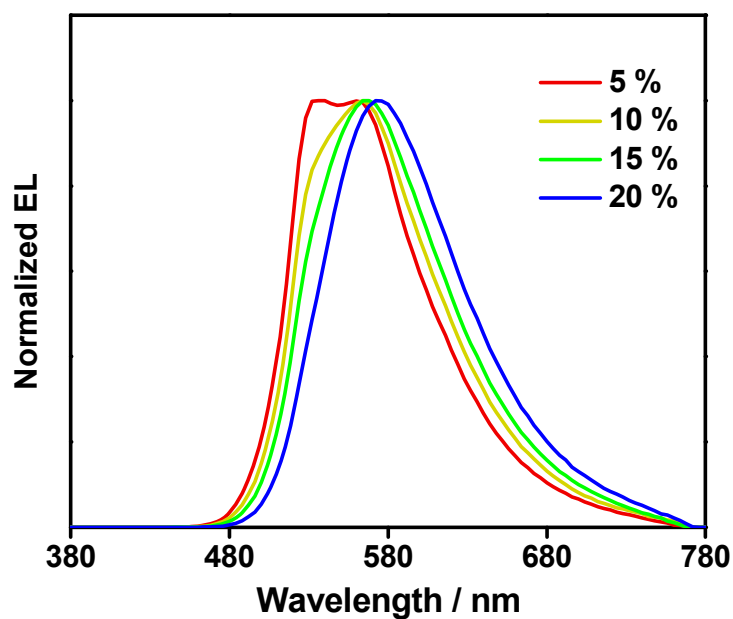

**Figure S28.** Normalized EL spectra of solution-processed devices made with **3** at a luminance of  $100 \text{ cd m}^{-2}$ .

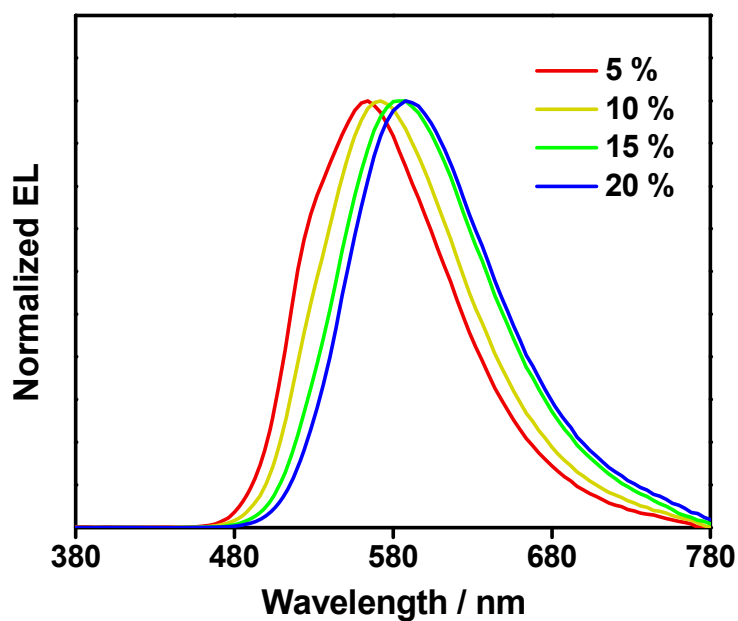

**Figure S29.** Normalized EL spectra of solution-processed devices made with **4** at a luminance of  $100 \text{ cd m}^{-2}$ .

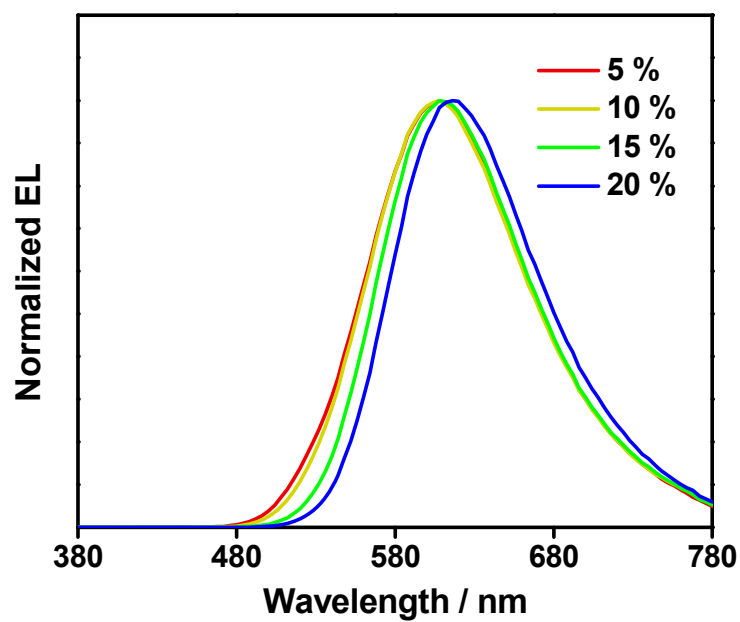

*Figure S30.* Normalized EL spectra of solution-processed devices made with **5** at a luminance of  $100 \text{ cd m}^{-2}$ .

**Table S22.** Key parameters of the solution-processed OLEDs based on **1–5**.

| Complex  | Conc. [wt%] | CE <sup>a</sup> [cd A <sup>-1</sup> ] | PE <sup>b</sup> [lm W <sup>-1</sup> ] | EQE <sup>c</sup> [%] | $\lambda_{\max}$ <sup>d</sup> | CIE <sup>e</sup> [x, y] |
|----------|-------------|---------------------------------------|---------------------------------------|----------------------|-------------------------------|-------------------------|
| <b>1</b> | 5           | 26.8                                  | 10.5                                  | 7.2                  | 528                           | 0.36, 0.61              |
|          | 10          | 37.0                                  | 18.2                                  | 10.0                 | 528                           | 0.37, 0.60              |
|          | 15          | 28.0                                  | 17.5                                  | 7.7                  | 528                           | 0.37, 0.60              |
|          | 20          | 21.4                                  | 13.4                                  | 6.0                  | 532                           | 0.38, 0.59              |
| <b>2</b> | 5           | 11.8                                  | 3.4                                   | 3.4                  | 532                           | 0.40, 0.57              |
|          | 10          | 15.1                                  | 5.4                                   | 4.4                  | 532                           | 0.40, 0.57              |
|          | 15          | 25.4                                  | 11.6                                  | 7.4                  | 532                           | 0.41, 0.57              |
|          | 20          | 30.1                                  | 18.5                                  | 8.9                  | 532                           | 0.42, 0.56              |
| <b>3</b> | 5           | 14.5                                  | 2.9                                   | 4.4                  | 560                           | 0.41, 0.56              |
|          | 10          | 17.7                                  | 5.6                                   | 5.6                  | 564                           | 0.44, 0.54              |
|          | 15          | 22.8                                  | 11.2                                  | 7.5                  | 564                           | 0.46, 0.53              |
|          | 20          | 22.2                                  | 12.4                                  | 8.0                  | 572                           | 0.49, 0.50              |
| <b>4</b> | 5           | 9.3                                   | 2.7                                   | 3.0                  | 564                           | 0.44, 0.54              |
|          | 10          | 10.6                                  | 3.5                                   | 3.7                  | 572                           | 0.47, 0.51              |
|          | 15          | 11.9                                  | 4.6                                   | 4.7                  | 588                           | 0.51, 0.48              |
|          | 20          | 12.3                                  | 5.2                                   | 5.2                  | 588                           | 0.53, 0.48              |
| <b>5</b> | 5           | 3.8                                   | 0.8                                   | 1.9                  | 608                           | 0.55, 0.44              |
|          | 10          | 4.1                                   | 1.1                                   | 2.1                  | 608                           | 0.55, 0.44              |
|          | 15          | 8.5                                   | 4.0                                   | 4.9                  | 608                           | 0.58, 0.42              |
|          | 20          | 7.9                                   | 4.4                                   | 5.3                  | 616                           | 0.60, 0.40              |

<sup>a</sup> CE represents maximum current efficiency.

<sup>b</sup> PE represents maximum power efficiency.

<sup>c</sup> EQE represents maximum external quantum efficiency.

<sup>d</sup>  $\lambda_{\max}$  represents peak maximum.

<sup>e</sup> CIE coordinates are taken at a current density of 100 cd m<sup>-2</sup>.

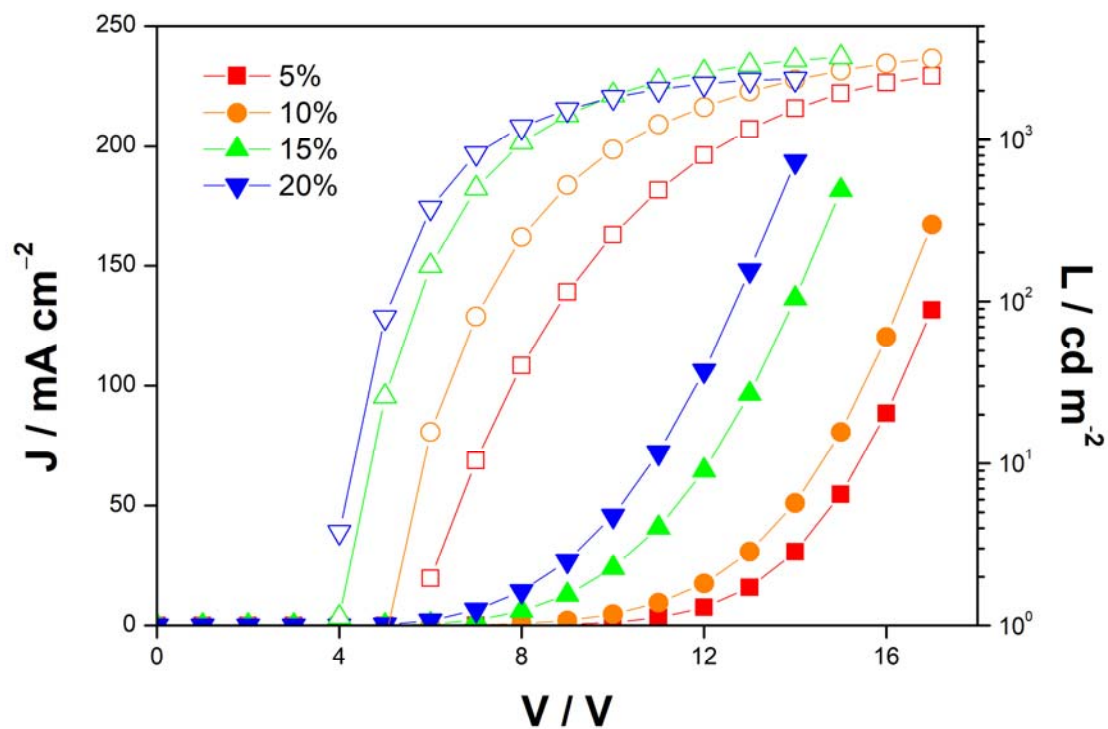

**Figure S31.** Current density–voltage–luminance ( $J$ – $V$ – $L$ ) characteristics of solution-processed devices made with **1**.

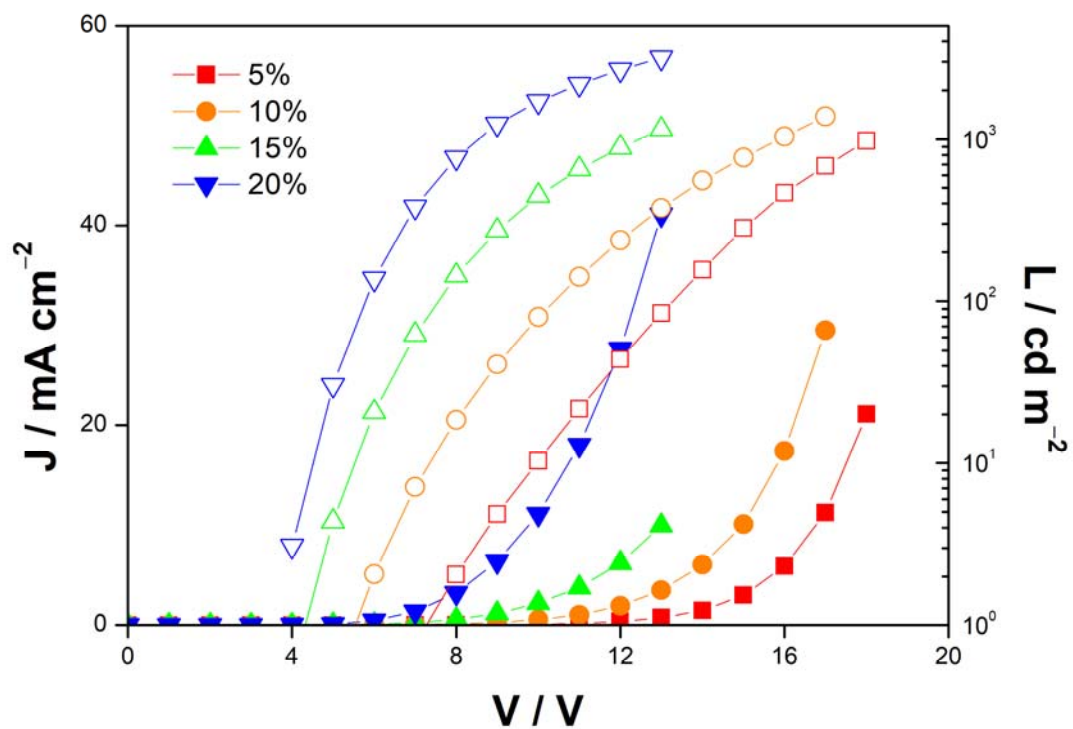

**Figure S32.**  $J$ - $V$ - $L$  characteristics of solution-processed devices made with **2**.

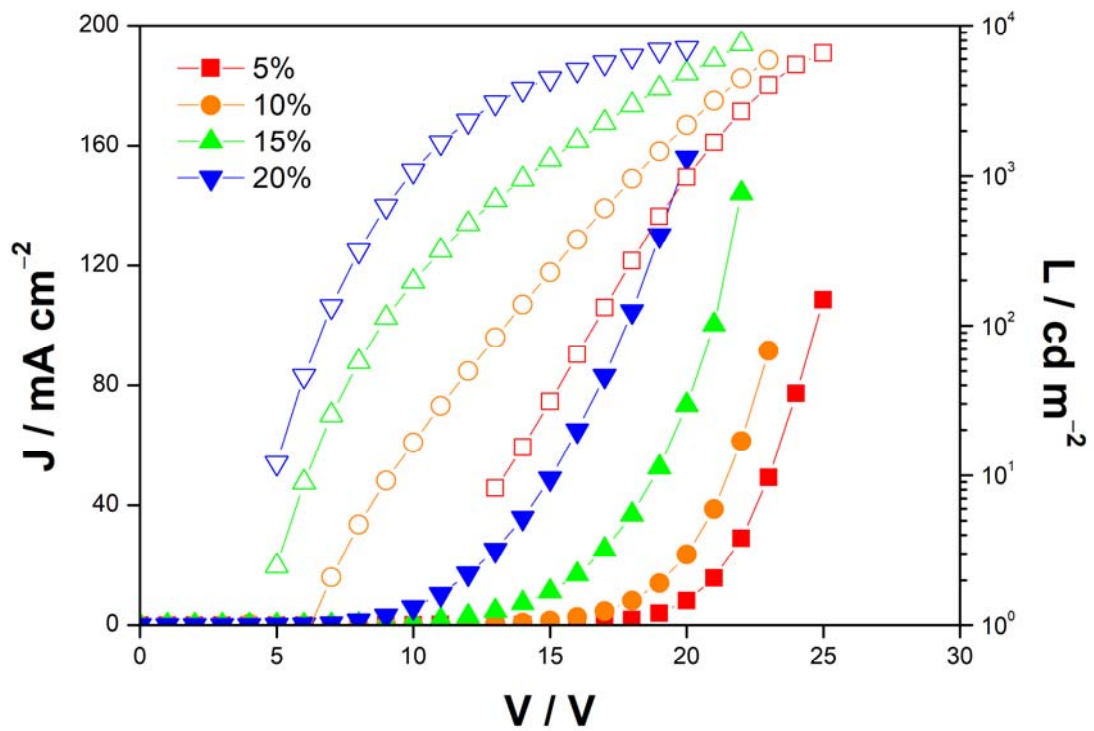

**Figure S33.**  $J$ - $V$ - $L$  characteristics of solution-processed devices made with **3**.

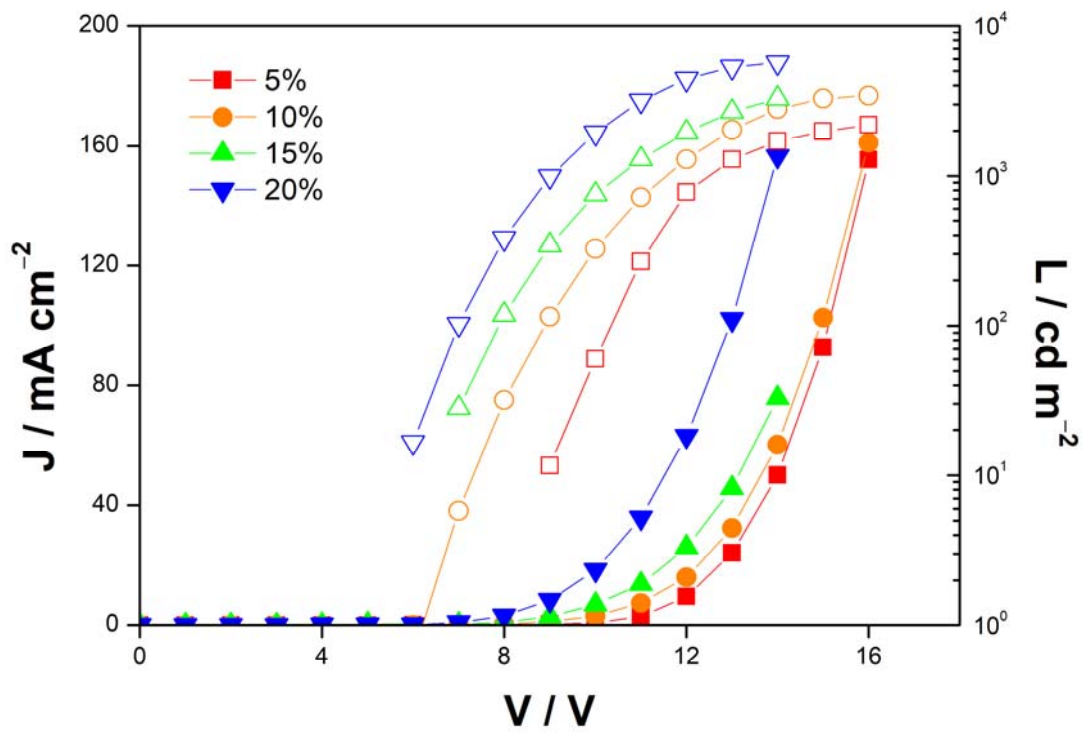

**Figure S34.**  $J$ - $V$ - $L$  characteristics of solution-processed devices made with 4.



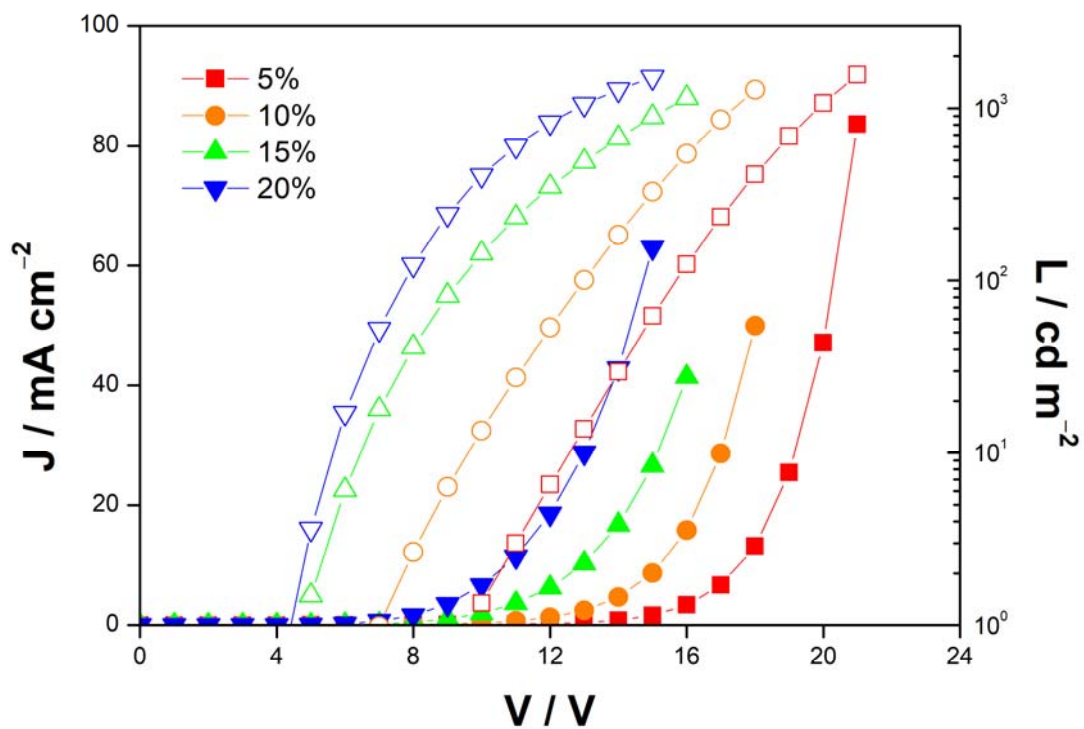

**Figure S35.**  $J$ - $V$ - $L$  characteristics of solution-processed devices made with **5**.

**Materials and reagents.** Potassium tetrachloroaurate(III) was purchased from Strem or Matrix Scientific. Tetrahydrofuran for reactions were purified by the Innovative Technology, Inc. PureSolv MD 5 Solvent Purification System before use. All other reagents were of analytical grade and were used as received. Tetra-*n*-butylammonium hexafluorophosphate (Aldrich, 98 %) was recrystallized for no less than three times from hot absolute ethanol prior to use. All reactions were performed under anaerobic and anhydrous conditions using standard Schlenk techniques under an inert atmosphere of nitrogen.

**Physical measurements and instrumentation.** The UV–vis absorption spectra were recorded on a Cary 60 UV–vis (Agilent Technology) spectrophotometer equipped with a Xenon flash lamp. Transient absorption measurements were performed on a LP980 laser flash photolysis spectrometer (Edinburgh Instruments Ltd., Livingston, U.K.) at ambient temperature. The excitation source was the 355-nm output (third harmonic) of a Nd:YAG laser (Spectra-Physics Quanta-Ray Lab130 Pulsed Nd:YAG Laser), and the probe light source was a Xe900 450W xenon arc lamp. The transient absorption spectra were detected by an image intensified CCD camera (Andor) with PC plug-in controller, fully operated by L900 spectrometer software. The absorption kinetics were detected by a Hamamatsu R928 photomultiplier tube and recorded on a Tektronix model TDS3012B (100 MHz, 1.25 GS/s) digital oscilloscope and analyzed using the same software for exponential fit.  $^1\text{H}$  and  $^{13}\text{C}\{^1\text{H}\}$  and  $^{19}\text{F}\{^1\text{H}\}$  nuclear magnetic resonance (NMR) spectra were recorded on Bruker AVANCE 400 or 500 (400 MHz and 500 MHz for  $^1\text{H}$ , respectively; 100 MHz or 125 MHz for  $^{13}\text{C}$ , respectively; and 470 MHz or 376 MHz for  $^{19}\text{F}$  nucleus, respectively) fourier-transform NMR spectrometers. All  $^1\text{H}$  and  $^{13}\text{C}$  chemical shift data were reported relative to tetramethylsilane, with the residual NMR solvent peak used as internal reference.  $^{19}\text{F}$  chemical shift data were reported with reference to trifluoroacetic acid ( $\delta = 76.55$  ppm). Splitting of the  $^{13}\text{C}$  signal due to  $^{19}\text{F}$ – $^{13}\text{C}$  coupling was not determined; instead

all of them were reported as individual singlet signals. High-resolution electrospray ionization (HR-ESI) mass spectra were recorded on Bruker maXis II<sup>TM</sup> High Resolution LC-QTOF Mass Spectrometer. Fourier transform infrared (FT-IR) measurements were performed with a PerkinElmer Spectrum Two system (PerkinElmer, Buckinghamshire, UK) at a wavenumber range of 400–4000 cm<sup>-1</sup>. Elemental analyses were performed on the Carlo Erba 1106 elemental analyzer at the Institute of Chemistry, Chinese Academy of Sciences in Beijing. Steady-state excitation and emission spectra were recorded on a Horiba Scientific FluoroMax-4 fluorescence spectrofluorometer equipped with a R928P PMT detector. Liquid nitrogen was placed into the quartz-walled optical Dewar flask for low temperature (77 K) photophysical measurements. Solid-state photophysical measurements were performed with solid sample loaded into a quartz tube inside a quartz-walled Dewar flask. Low temperature (77 K) photophysical measurements were done by placing liquid nitrogen into the optical Dewar flask. Excited-state lifetimes of solution and glass samples were measured with a conventional laser system. The excitation source used was the 355-nm output (third harmonic, 8 ns) of a Spectra-Physics Quanta-Ray Q-switched GCR-150 pulsed Nd:YAG laser (10 Hz). Luminescence decay signals were detected by a Hamamatsu R928 photomultiplier tube, recorded on a Tektronix model TDS-620A (500 MHz, 2 GSs<sup>-1</sup>) digital oscilloscope, with a 50 Ω load resistor and analyzed with a program for exponential fits. Relative photoluminescence quantum yields in solution were measured by the optical dilute method reported by Demas and Crosby.<sup>2</sup> A degassed solution of [Ru(bpy)<sub>3</sub>]Cl<sub>2</sub> in MeCN has been used as reference ( $\Phi_{\text{lum}} = 0.06$ , excitation wavelength at 436 nm),<sup>2</sup> whereas absolute photoluminescence quantum yields (PLQYs) in thin films were measured on a Hamamatsu C9920–03 absolute PLQY measurement system. Excited-state lifetimes of thin films were measured on an Edinburgh Instruments LP980 Spectrometer. Variable-temperature emission spectra were obtained using the Edinburgh Instruments FS5 Spectrofluorometer with an Oxford Instrument OptistatDN2

cryostat for temperatures in the range of 77 K to 320 K. The solution sample was degassed by bubbling with nitrogen. Solution samples and thin films were placed in a quartz cell inside the cryostat and maintained at the desired temperature until equilibrium was reached before recording the spectrum. Cyclic voltammetry was performed with a CH Instruments Model CHI620E (CH Instruments, Inc.). All solutions for electrochemical measurements were purged with prepurified argon gas prior to measurement. Thermal analyses were performed on a TGA Q50 (TA Instruments), in which  $T_d$  is defined as the temperature at which the sample shows a 5 % weight loss.

**Synthesis and characterization.** The cyclometalating ligands, 4-*t*BuC<sup>N<sup>THPY</sup></sup>C<sup>Bu-4</sup> and 3,5-F<sub>2</sub>C<sup>N<sup>THPY</sup></sup>CF<sub>2</sub>-3,5, and the respective precursor gold compounds, [Au{4-*t*BuC<sup>N<sup>THPY</sup></sup>C<sup>Bu-4</sup>}Cl] and [Au{3,5-F<sub>2</sub>C<sup>N<sup>THPY</sup></sup>CF<sub>2</sub>-3,5}Cl], were prepared by slight modifications of the literature procedures.<sup>3-7</sup> H-C≡C-C<sub>6</sub>H<sub>4</sub>-N(C<sub>6</sub>H<sub>5</sub>)<sub>2</sub>-*p*, H-C≡C-C<sub>6</sub>H<sub>4</sub>-N[C<sub>13</sub>H<sub>7</sub>(C<sub>6</sub>H<sub>13</sub>)<sub>2</sub>]<sub>2</sub>, H-C≡C-C<sub>6</sub>H<sub>4</sub>-N[C<sub>12</sub>H<sub>7</sub>N(C<sub>6</sub>H<sub>13</sub>)<sub>2</sub>] and the alkynylgold(III) complexes were synthesized by modifying a literature procedure for bis-cyclometalated diarylpyridine alkynylgold(III) complexes previously reported by us.<sup>4-7</sup>

**4-*t*BuC<sup>N<sup>THPY</sup></sup>C<sup>Bu-4</sup>.** Yield: 540 mg (90 %). <sup>1</sup>H NMR (500 MHz, CDCl<sub>3</sub>, 298 K, relative to Me<sub>4</sub>Si, δ/ppm): δ 8.18–8.16 (d, *J* = 8.5 Hz, 2H, phenyl protons), 8.14–8.12 (d, *J* = 8.5 Hz, 2H, phenyl protons), 8.07 (s, 1H, thienopyridyl proton), 7.72–7.71 (d, *J* = 5.4 Hz, 1H, thienopyridyl proton), 7.59–7.58 (d, *J* = 8.5 Hz, 2H, phenyl protons), 7.53–7.51 (d, *J* = 8.5 Hz, 2H, phenyl protons), 7.47–7.46 (d, *J* = 5.4 Hz, 1H, thienopyridyl proton), 1.40 (s, 9H, -*t*Bu), 1.38 (s, 9H, -*i*Bu). <sup>13</sup>C{<sup>1</sup>H} NMR (150 MHz, CDCl<sub>3</sub>, 298 K, relative to Me<sub>4</sub>Si, δ/ppm): δ 152.65, 152.42, 151.81, 151.53, 147.48, 137.18, 137.13, 132.20, 131.94, 128.26, 126.84, 125.70, 125.68, 123.86, 112.57, 34.88, 34.73, 31.47, 31.44. HRMS (positive ESI) calcd for

C<sub>27</sub>H<sub>29</sub>NS:  $m/z = 399.2015$  [M]<sup>+</sup>; found 399.2044 [M]<sup>+</sup>. Elemental analysis calculated for C<sub>27</sub>H<sub>29</sub>NS·H<sub>2</sub>O (%): C, 77.65; H, 7.48; N, 3.35; found: C, 77.68; H, 7.13; N, 3.43.

**[Au{4-<sup>t</sup>BuC<sup>N</sup><sup>THPY</sup>C<sup>t</sup>Bu-4}Cl]**. Yield: 300 mg (38 %). <sup>1</sup>H NMR (500 MHz, CDCl<sub>3</sub>, 298 K, relative to Me<sub>4</sub>Si,  $\delta$ /ppm):  $\delta$  8.09 (d,  $J = 2.2$  Hz, 1H, phenyl proton), 8.01 (d,  $J = 2.2$  Hz, 1H, phenyl proton), 7.99–7.98 (d,  $J = 5.4$  Hz, 1H, thienopyridyl proton), 7.90–7.89 (d,  $J = 8.3$  Hz, 1H, phenyl proton), 7.51–7.50 (d,  $J = 8.3$  Hz, 1H, phenyl proton), 7.48–7.47 (d,  $J = 5.4$  Hz, 1H, thienopyridyl proton), 7.47 (s, 1H, thienopyridyl proton), 7.40–7.38 (dd,  $J = 8.3$  and 2.2 Hz, 1H, phenyl proton), 7.30–7.28 (dd,  $J = 8.3$  and 2.2 Hz, 1H, phenyl proton), 1.41 (s, 9H, -<sup>t</sup>Bu), 1.39 (s, 9H, -<sup>t</sup>Bu). No <sup>13</sup>C{<sup>1</sup>H} NMR signals were recorded due to the low solubility of the complex. HRMS (positive ESI) calcd for C<sub>27</sub>H<sub>28</sub>AuCINS:  $m/z = 630.1291$  [M+H]<sup>+</sup>; found 630.1268 [M+H]<sup>+</sup>.

**3,5-F<sub>2</sub>C<sup>N</sup><sup>THPY</sup>CF<sub>2</sub>-3,5**. Yield: 540 mg (93 %). <sup>1</sup>H NMR (500 MHz, CDCl<sub>3</sub>, 298 K, relative to Me<sub>4</sub>Si,  $\delta$ /ppm):  $\delta$  8.41 (s, 1H, thienopyridyl proton), 7.82–7.80 (d,  $J = 5.4$  Hz, 1H, thienopyridyl proton), 7.76–7.74 (m, 2H, phenyl proton), 7.73–7.71 (m, 2H, phenyl protons), 7.54–7.53 (d,  $J = 5.4$  Hz, 1H, thienopyridyl proton), 7.00–6.95 (tt,  $J = 8.7$  and 2.4 Hz, 1H, phenyl proton), 6.89–6.85 (tt,  $J = 8.7$  and 2.4 Hz, 1H, phenyl proton). <sup>13</sup>C{<sup>1</sup>H} NMR (150 MHz, CDCl<sub>3</sub>, 298 K, relative to Me<sub>4</sub>Si,  $\delta$ /ppm):  $\delta$  148.01, 133.58, 133.05, 124.18, 114.22, 111.71, 111.65, 111.55, 111.49, 109.94, 109.89, 109.78, 109.73, 105.23, 105.02, 104.82, 104.25, 104.04, 103.84. <sup>19</sup>F{<sup>1</sup>H} NMR (470 MHz, CDCl<sub>3</sub>, 298 K, relative to CF<sub>3</sub>COOH,  $\delta$ /ppm):  $\delta$  -108.67, -109.53. HRMS (positive ESI) calcd for C<sub>19</sub>H<sub>10</sub>F<sub>4</sub>NS:  $m/z = 360.0465$  [M+H]<sup>+</sup>; found 360.0567 [M+H]<sup>+</sup>. Elemental analysis calculated for C<sub>19</sub>H<sub>9</sub>F<sub>4</sub>NS (%): C, 63.51; H, 2.52; N, 3.90; found: C, 63.49; H, 2.50; N, 3.87.

[Au{3,5-F<sub>2</sub>C<sup>N</sup>THPY<sup>^</sup>CF<sub>2</sub>-3,5}Cl]. Yield: 350 mg (40 %). <sup>1</sup>H NMR (500 MHz, DMSO-*d*<sub>6</sub>, 298 K, relative to Me<sub>4</sub>Si, δ/ppm): δ 8.68 (s, 1H, thienopyridyl proton), 8.63–8.62 (d, *J* = 5.4 Hz, 1H, thienopyridyl proton), 7.73–7.71 (m, 2H, thienopyridyl proton and phenyl proton), 7.56–7.55 (d, *J* = 8.2, 1H, phenyl proton), 7.27–7.24 (m, 1H, phenyl proton), 7.08–7.05 (m, 1H, phenyl proton). No <sup>13</sup>C{<sup>1</sup>H} NMR signals were recorded due to the low solubility of the complex. <sup>19</sup>F{<sup>1</sup>H} NMR (470 MHz, DMSO-*d*<sub>6</sub>, 298 K, relative to CF<sub>3</sub>COOH, δ/ppm): –91.87, –93.41, –110.56, –111.32. HRMS (positive ESI) calcd for C<sub>19</sub>H<sub>8</sub>AuClF<sub>4</sub>NS: *m/z* = 589.9662 [M+H]<sup>+</sup>; found 589.9682 [M+H]<sup>+</sup>.

[Au{4-<sup>t</sup>BuC<sup>N</sup>THPY<sup>^</sup>C<sup>t</sup>Bu-4}{C≡C–C<sub>6</sub>H<sub>4</sub>–N(C<sub>6</sub>H<sub>5</sub>)<sub>2</sub>-*p*}] (1). A mixture of [Au{4-<sup>t</sup>BuC<sup>N</sup>THPY<sup>^</sup>C<sup>t</sup>Bu-4}Cl] (70 mg, 0.11 mmol), copper(I) iodide (3 mg, 0.02 mmol), triethylamine (2 mL) and (4-ethynylphenyl)diphenylamine (45 mg, 0.17 mmol) in a degassed THF (20 mL) solution was stirred at room temperature for 4 h. After removing the solvent, the crude product was purified by column chromatography on silica gel (70–230 mesh) using hexane-ethyl acetate (10:1, v/v) as the eluent. Subsequent recrystallization by diffusion of diethyl ether vapor into a concentrated THF solution of the product gave **1** as a yellow solid. Yield: 62 mg (65 %). <sup>1</sup>H NMR (500 MHz, CDCl<sub>3</sub>, 298 K, relative to Me<sub>4</sub>Si, δ/ppm): δ 8.33–8.32 (d, *J* = 2.2 Hz, 1H, phenyl proton of 4-<sup>t</sup>BuC<sup>N</sup>THPY<sup>^</sup>C<sup>t</sup>Bu-4), 8.26–8.25 (d, *J* = 2.2 Hz, 1H, phenyl proton of 4-<sup>t</sup>BuC<sup>N</sup>THPY<sup>^</sup>C<sup>t</sup>Bu-4), 7.94–7.92 (m, 2H, phenyl and thienopyridyl protons of 4-<sup>t</sup>BuC<sup>N</sup>THPY<sup>^</sup>C<sup>t</sup>Bu-4), 7.80 (s, 1H, thienopyridyl proton of 4-<sup>t</sup>BuC<sup>N</sup>THPY<sup>^</sup>C<sup>t</sup>Bu-4), 7.56–7.54 (d, *J* = 8.3 Hz, 1H, phenyl proton of 4-<sup>t</sup>BuC<sup>N</sup>THPY<sup>^</sup>C<sup>t</sup>Bu-4), 7.51–7.50 (d, *J* = 8.7 Hz, 2H, phenyl protons of –C≡C–C<sub>6</sub>H<sub>4</sub>–), 7.46–7.45 (d, *J* = 5.4 Hz, 1H, thienopyridyl proton of 4-<sup>t</sup>BuC<sup>N</sup>THPY<sup>^</sup>C<sup>t</sup>Bu-4), 7.40–7.38 (dd, *J* = 8.3 and 2.2 Hz, 1H, phenyl proton of 4-<sup>t</sup>BuC<sup>N</sup>THPY<sup>^</sup>C<sup>t</sup>Bu-4), 7.30–7.27 (m, 5H, phenyl proton of 4-<sup>t</sup>BuC<sup>N</sup>THPY<sup>^</sup>C<sup>t</sup>Bu-4 and phenyl protons of –N(C<sub>6</sub>H<sub>5</sub>)<sub>2</sub>), 7.15–7.13 (m, 4H,

phenyl protons of  $-N(C_6H_5)_2$ ), 7.06–7.04 (m, 4H, phenyl protons of  $-C\equiv C-C_6H_4-$  and phenyl protons of  $-N(C_6H_5)_2$ ), 1.42 (s, 9H,  $-tBu$ ), 1.40 (s, 9H,  $-tBu$ ).  $^{13}C\{^1H\}$  NMR (150 MHz,  $CDCl_3$ , 298 K, relative to  $Me_4Si$ ,  $\delta/ppm$ ):  $\delta$  168.33, 165.76, 160.37, 158.56, 155.10, 153.86, 150.33, 147.79, 146.98, 146.72, 146.45, 136.49, 133.50, 133.46, 133.00, 129.41, 127.90, 127.62, 124.68, 124.24, 124.04, 123.79, 123.45, 123.39, 123.09, 120.94, 110.36, 100.43, 92.03, 35.54, 35.41, 31.47, 31.39. HRMS (positive ESI) calcd for  $C_{47}H_{41}AuN_2S$ :  $m/z$  = 862.2651  $[M]^+$ ; found 862.2604  $[M]^+$ . IR (thin film):  $2155\text{ cm}^{-1}$  ( $\nu(C\equiv C)$ ). Elemental analysis calculated for  $C_{47}H_{41}AuN_2S$  (%): C, 65.42; H, 4.79; N, 3.25; found: C, 65.66; H, 4.74; N, 3.42.

$[Au\{4-tBuC^{\wedge}N^{THPY^{\wedge}}C^{\wedge}Bu-4\}\{C\equiv C-C_6H_4-N[C_{13}H_7(C_6H_{13})_2\}_2\}]$  (**2**). This complex was synthesized by a procedure similar to that of **1**, except that  $H-C\equiv C-C_6H_4-N[C_{13}H_7(C_6H_{13})_2\}_2$  (64 mg, 0.11 mmol) was used instead of (4-ethynylphenyl)diphenylamine. Subsequent recrystallization by diffusion of diethyl ether vapor into a concentrated THF solution of the product gave **2** as a yellow solid. Yield: 90 mg (59 %).  $^1H$  NMR (400 MHz, acetone- $d_6$ , 298 K, relative to  $Me_4Si$ ,  $\delta/ppm$ ):  $\delta$  8.41–8.39 (d,  $J = 5.4$  Hz, 1H, thienopyridyl proton of  $4-tBuC^{\wedge}N^{THPY^{\wedge}}C^{\wedge}Bu-4$ ), 8.35–8.34 (d,  $J = 2.1$  Hz, 1H, phenyl proton of  $4-tBuC^{\wedge}N^{THPY^{\wedge}}C^{\wedge}Bu-4$ ), 8.30 (s, 1H, thienopyridyl proton of  $4-tBuC^{\wedge}N^{THPY^{\wedge}}C^{\wedge}Bu-4$ ), 8.26–8.25 (d,  $J = 2.1$  Hz, 1H, phenyl proton of  $4-tBuC^{\wedge}N^{THPY^{\wedge}}C^{\wedge}Bu-4$ ), 8.04–8.02 (d,  $J = 8.3$  Hz, 1H, phenyl proton of  $4-tBuC^{\wedge}N^{THPY^{\wedge}}C^{\wedge}Bu-4$ ), 7.80–7.78 (d,  $J = 8.2$  Hz, 1H, phenyl proton of  $4-tBuC^{\wedge}N^{THPY^{\wedge}}C^{\wedge}Bu-4$ ), 7.77–7.73 (m, 5H, thienopyridyl proton of  $4-tBuC^{\wedge}N^{THPY^{\wedge}}C^{\wedge}Bu-4$  and fluorenyl protons), 7.52–7.49 (m, 3H, phenyl proton of  $4-tBuC^{\wedge}N^{THPY^{\wedge}}C^{\wedge}Bu-4$  and phenyl protons of  $-C\equiv C-C_6H_4-$ ), 7.44–7.43 (d,  $J = 6.7$  Hz, 2H, fluorenyl protons), 7.39–7.36 (dd,  $J = 8.2$  and  $2.1$  Hz, 1H, phenyl proton of  $4-tBuC^{\wedge}N^{THPY^{\wedge}}C^{\wedge}Bu-4$ ), 7.36–7.27 (m, 6H, fluorenyl protons), 7.13–7.11 (m, 4H, phenyl

protons of  $-\text{C}\equiv\text{C}-\text{C}_6\text{H}_4-$  and fluorenyl protons), 2.00–1.94 (m, 8H,  $-\text{CH}_2-$ ), 1.42 (s, 9H,  $-\text{CH}_3$ ), 1.40 (s, 9H,  $-\text{CH}_3$ ), 1.20–1.08 (m, 24H,  $-\text{CH}_2-$ ), 0.82–0.78 (t,  $J = 7.1$  Hz, 12H,  $-\text{CH}_3$ ), 0.77–0.62 (m, 8H,  $-\text{CH}_2-$ ).  $^{13}\text{C}\{^1\text{H}\}$  NMR (150 MHz,  $\text{CDCl}_3$ , 298 K,  $\delta/\text{ppm}$ ):  $\delta$  168.37, 165.78, 160.34, 158.55, 155.08, 153.85, 152.24, 150.73, 150.31, 147.07, 146.98, 146.46, 141.10, 136.56, 136.49, 133.49, 132.98, 127.89, 127.64, 126.88, 126.43, 124.26, 124.06, 123.82, 123.62, 123.48, 122.87, 122.78, 120.47, 119.23, 110.37, 91.99, 55.23, 40.46, 35.53, 35.40, 31.73, 31.45, 31.36, 29.83, 23.96, 22.70, 14.24. HRMS (positive ESI) calcd for  $\text{C}_{85}\text{H}_{97}\text{AuN}_2\text{S}$ :  $m/z = 1373.6954$   $[\text{M}]^+$ ; found 1373.7057  $[\text{M}]^+$ . IR (thin film): 2165  $\text{cm}^{-1}$   $\nu(\text{C}\equiv\text{C})$ . Elemental analysis calculated for  $\text{C}_{85}\text{H}_{97}\text{AuN}_2\text{S}$  (%): C, 74.21; H, 7.11; N, 2.04; found: C, 73.90; H, 7.11; N, 2.09.

$[\text{Au}\{4\text{-BuC}^{\text{N}}\text{THPY}^{\text{C}}\text{Bu-4}\}\{\text{C}\equiv\text{C}-\text{C}_6\text{H}_4-\text{N}[\text{C}_{12}\text{H}_7\text{N}(\text{C}_6\text{H}_{13})]_2\}]$  (**3**). This complex was synthesized by a procedure similar to that of **1**, except that  $\text{H}-\text{C}\equiv\text{C}-\text{C}_6\text{H}_4-\text{N}[\text{C}_{12}\text{H}_7\text{N}(\text{C}_6\text{H}_{13})]_2$  (70 mg, 0.11 mmol) was used instead of (4-ethynylphenyl)diphenylamine. Subsequent recrystallization by diffusion of diethyl ether vapor into a concentrated THF solution of the product gave **3** as a yellow solid. Yield: 80 mg (60 %).  $^1\text{H}$  NMR (400 MHz,  $\text{DMSO}-d_6$ , 298 K,  $\delta/\text{ppm}$ ):  $\delta$  8.51–8.50 (d,  $J = 5.4$  Hz, 1H, thienopyridyl proton of  $4\text{-BuC}^{\text{N}}\text{THPY}^{\text{C}}\text{Bu-4}$ ), 8.41 (s, 1H, thienopyridyl proton of  $4\text{-BuC}^{\text{N}}\text{THPY}^{\text{C}}\text{Bu-4}$ ), 8.15–8.14 (d,  $J = 2.1$  Hz, 1H, phenyl proton of  $4\text{-BuC}^{\text{N}}\text{THPY}^{\text{C}}\text{Bu-4}$ ), 8.10–8.09 (m, 4H, carbazolyl protons), 8.05 (d,  $J = 2.1$  Hz, 1H, phenyl proton of  $4\text{-BuC}^{\text{N}}\text{THPY}^{\text{C}}\text{Bu-4}$ ), 7.97–7.95 (d,  $J = 8.3$  Hz, 1H, phenyl proton of  $4\text{-BuC}^{\text{N}}\text{THPY}^{\text{C}}\text{Bu-4}$ ), 7.82–7.80 (d,  $J = 8.3$  Hz, 1H, phenyl proton of  $4\text{-BuC}^{\text{N}}\text{THPY}^{\text{C}}\text{Bu-4}$ ), 7.74–7.73 (d,  $J = 5.4$  Hz, 1H, thienopyridyl proton of  $4\text{-BuC}^{\text{N}}\text{THPY}^{\text{C}}\text{Bu-4}$ ), 7.66–7.64 (d,  $J = 8.8$  Hz, 2H, carbazolyl protons), 7.60–7.58 (d,  $J = 8.3$  Hz, 2H, carbazolyl protons), 7.51–7.49 (dd,  $J = 8.3$  and 2.1 Hz, 1H, phenyl proton of



4-<sup>t</sup>BuC<sup>N</sup><sup>THPY</sup><sup>C</sup><sup>t</sup>Bu-4), 7.46–7.39 (m, 4H, carbazolyl protons), 7.36–7.33 (dd,  $J = 8.3$  and 2.1 Hz, 1H, phenyl proton of 4-<sup>t</sup>BuC<sup>N</sup><sup>THPY</sup><sup>C</sup><sup>t</sup>Bu-4), 7.31–7.28 (d,  $J = 8.7$  Hz, 2H, phenyl protons of  $-\text{C}\equiv\text{C}-\text{C}_6\text{H}_4-$ ), 7.15–7.12 (t,  $J = 7.6$  Hz, 2H, carbazolyl protons), 6.79–6.77 (d,  $J = 8.7$  Hz, 2H, phenyl protons of  $-\text{C}\equiv\text{C}-\text{C}_6\text{H}_4-$ ), 4.41–4.37 (t,  $J = 6.9$  Hz, 4H,  $-\text{NCH}_2-$ ), 1.80–1.77 (m, 4H,  $-\text{CH}_2-$ ), 1.33 (s, 9H,  $-\text{tBu}$ ), 1.31 (s, 9H,  $-\text{tBu}$ ), 1.30–1.20 (m, 12H,  $-\text{CH}_2-$ ), 0.83–0.79 (d,  $J = 7.0$  Hz, 6H,  $-\text{CH}_3$ ).  $^{13}\text{C}\{^1\text{H}\}$  NMR (150 MHz, THF-*d*<sub>8</sub>, 298 K,  $\delta/\text{ppm}$ ):  $\delta$  169.35, 166.60, 160.75, 159.34, 155.08, 153.73, 151.59, 149.80, 147.83, 147.40, 141.85, 140.93, 138.29, 137.85, 134.02, 133.92, 133.02, 128.48, 127.96, 126.17, 125.70, 124.98, 124.63, 124.10, 123.80, 123.50, 121.07, 119.76, 119.12, 118.99, 118.75, 111.30, 110.20, 109.35, 100.77, 91.53, 43.49, 35.79, 35.66, 32.42, 31.52, 31.41, 29.79, 27.64, 23.30, 14.19. HRMS (positive ESI) calcd for C<sub>71</sub>H<sub>71</sub>AuN<sub>4</sub>S:  $m/z = 1208.5060$  [M]<sup>+</sup>; found 1208.5047 [M]<sup>+</sup>. IR (thin film): 2163 cm<sup>-1</sup> ( $\nu(\text{C}\equiv\text{C})$ ). Elemental analysis calculated for C<sub>71</sub>H<sub>71</sub>AuN<sub>4</sub>S (%): C, 70.51; H, 5.92; N, 4.63; found: C, 70.25; H, 5.93; N, 4.69.

[Au{3,5-F<sub>2</sub>C<sup>N</sup><sup>THPY</sup><sup>CF</sup><sub>2-3,5</sub>} {C≡C-C<sub>6</sub>H<sub>4</sub>-N(C<sub>6</sub>H<sub>5</sub>)<sub>2-p</sub>}] (**4**). This complex was synthesized by a procedure similar to that of **1**, except that [Au{3,5-F<sub>2</sub>C<sup>N</sup><sup>THPY</sup><sup>CF</sup><sub>2-3,5</sub>}Cl] (64 mg, 0.11 mmol) was used instead of [Au{4-<sup>t</sup>BuC<sup>N</sup><sup>THPY</sup><sup>C</sup><sup>t</sup>Bu-4}Cl]. Subsequent recrystallization by diffusion of diethyl ether vapor into a concentrated THF solution of the product gave **4** as a yellow solid. Yield: 50 mg (56 %).  $^1\text{H}$  NMR (500 MHz, CDCl<sub>3</sub>, 298 K, relative to Me<sub>4</sub>Si,  $\delta/\text{ppm}$ ):  $\delta$  7.97–7.95 (d,  $J = 5.4$  Hz, 1H, thienopyridyl proton of 3,5-F<sub>2</sub>C<sup>N</sup><sup>THPY</sup><sup>CF</sup><sub>2-3,5</sub>), 7.87 (s, 1H, thienopyridyl proton of 3,5-F<sub>2</sub>C<sup>N</sup><sup>THPY</sup><sup>CF</sup><sub>2-3,5</sub>), 7.50–7.46 (m, 2H, thienopyridyl proton of 3,5-F<sub>2</sub>C<sup>N</sup><sup>THPY</sup><sup>CF</sup><sub>2-3,5</sub> and phenyl proton of 3,5-F<sub>2</sub>C<sup>N</sup><sup>THPY</sup><sup>CF</sup><sub>2-3,5</sub>), 7.38–7.37 (d,  $J = 8.3$  Hz, 2H, phenyl protons of  $-\text{C}\equiv\text{C}-\text{C}_6\text{H}_4-$ ), 7.29–7.27 (m, 4H, phenyl protons of  $-\text{N}(\text{C}_6\text{H}_5)_2$ ), 7.14–7.12 (m, 4H, phenyl protons of  $-\text{N}(\text{C}_6\text{H}_5)_2$ ), 7.09–7.08 (d,  $J = 8.5$ , 1H, phenyl proton of 3,5-F<sub>2</sub>C<sup>N</sup><sup>THPY</sup><sup>CF</sup><sub>2-3,5</sub>), 7.05–7.02

(m, 4H, phenyl protons of  $-\text{C}\equiv\text{C}-\text{C}_6\text{H}_4-$  and phenyl protons of  $-\text{N}(\text{C}_6\text{H}_5)_2$ ), 6.83–6.80 (m, 1H, phenyl proton of  $3,5\text{-F}_2\text{C}^{\text{N}^{\text{THPY}}}\text{CF}_2\text{-3,5}$ ), 6.70–6.66 (m, 1H, phenyl proton of  $3,5\text{-F}_2\text{C}^{\text{N}^{\text{THPY}}}\text{CF}_2\text{-3,5}$ ). No  $^{13}\text{C}\{^1\text{H}\}$  NMR signals were recorded due to the low solubility of the complex.  $^{19}\text{F}\{^1\text{H}\}$  NMR (470 MHz,  $\text{CDCl}_3$ , 298 K, relative to  $\text{CF}_3\text{COOH}$ ,  $\delta/\text{ppm}$ ): –85.41, –86.71, –110.90, –111.47. HRMS (positive ESI) calcd for  $\text{C}_{39}\text{H}_{22}\text{AuF}_4\text{N}_2\text{S}$ :  $m/z = 823.1100$   $[\text{M}+\text{H}]^+$ ; found 823.1096  $[\text{M}+\text{H}]^+$ . IR (thin film):  $2135\text{ cm}^{-1}$   $\nu(\text{C}\equiv\text{C})$ . Elemental analysis calculated for  $\text{C}_{39}\text{H}_{21}\text{AuF}_4\text{N}_2\text{S}\cdot\frac{1}{2}\text{H}_2\text{O}$  (%): C, 56.33; H, 2.67; N, 3.37; found: C, 56.40; H, 2.78; N, 3.29.

$[\text{Au}\{3,5\text{-F}_2\text{C}^{\text{N}^{\text{THPY}}}\text{CF}_2\text{-3,5}\}\{\text{C}\equiv\text{C}-\text{C}_6\text{H}_4-\text{N}[\text{C}_{13}\text{H}_7(\text{C}_6\text{H}_{13})_2\text{]}_2\}]$  (**5**). This complex was synthesized by a procedure similar to that of **2**, except that  $[\text{Au}\{3,5\text{-F}_2\text{C}^{\text{N}^{\text{THPY}}}\text{CF}_2\text{-3,5}\}\text{Cl}]$  (64 mg, 0.11 mmol) was used instead of  $[\text{Au}\{4\text{'BuC}^{\text{N}^{\text{THPY}}}\text{C'Bu-4}\}\text{Cl}]$ . Subsequent recrystallization by diffusion of diethyl ether vapor into a concentrated THF solution of the product gave **5** as a red solid. Yield: 90 mg (62 %).  $^1\text{H}$  NMR (500 MHz,  $\text{acetone-}d_6$ , 298 K,  $\delta/\text{ppm}$ ):  $\delta$  8.32–8.30 (m, 2H, thienopyridyl proton and thienopyridyl proton of  $3,5\text{-F}_2\text{C}^{\text{N}^{\text{THPY}}}\text{CF}_2\text{-3,5}$ ), 7.76–7.73 (m, 4H, fluorenyl protons), 7.58–7.57 (d,  $J = 5.4$  Hz, 1H, thienopyridyl proton of  $3,5\text{-F}_2\text{C}^{\text{N}^{\text{THPY}}}\text{CF}_2\text{-3,5}$ ), 7.47–7.43 (m, 3H, phenyl proton of  $3,5\text{-F}_2\text{C}^{\text{N}^{\text{THPY}}}\text{CF}_2\text{-3,5}$  and fluorenyl protons), 7.35–7.28 (m, 9H, phenyl proton of  $3,5\text{-F}_2\text{C}^{\text{N}^{\text{THPY}}}\text{CF}_2\text{-3,5}$ , phenyl protons of  $-\text{C}\equiv\text{C}-\text{C}_6\text{H}_4-$  and fluorenyl protons), 7.13–7.10 (dd,  $J = 8.1$  and  $2.0$  Hz, 2H, fluorenyl protons), 7.09–7.07 (d,  $J = 8.6$  Hz, 2H, phenyl protons of  $-\text{C}\equiv\text{C}-\text{C}_6\text{H}_4-$ ), 6.85–6.81 (m, 1H, phenyl proton of  $3,5\text{-F}_2\text{C}^{\text{N}^{\text{THPY}}}\text{CF}_2\text{-3,5}$ ), 6.70–6.67 (m, 1H, phenyl proton of  $3,5\text{-F}_2\text{C}^{\text{N}^{\text{THPY}}}\text{CF}_2\text{-3,5}$ ), 2.00–1.94 (m, 8H,  $-\text{CH}_2-$ ), 1.20–1.16 (m, 8H,  $-\text{CH}_2-$ ), 1.11–1.10 (m, 16H,  $-\text{CH}_2-$ ), 0.84–0.81 (t,  $J = 7.1$  Hz, 12H,  $-\text{CH}_3$ ), 0.77–0.62 (m, 8H,  $-\text{CH}_2-$ ).  $^{13}\text{C}\{^1\text{H}\}$  NMR (150 MHz,  $\text{CDCl}_3$ , 298 K, relative to  $\text{Me}_4\text{Si}$ ,  $\delta/\text{ppm}$ ):  $\delta$  152.22, 150.69, 150.41, 146.99, 141.09, 136.97, 136.53, 133.14, 130.17, 126.92, 126.46,

124.48, 123.52, 122.88, 122.68, 120.47, 120.39, 119.24, 119.14, 113.57, 55.23, 40.50, 31.77, 29.87, 24.00, 22.75, 14.25.  $^{19}\text{F}\{^1\text{H}\}$  NMR (376 MHz, acetone- $d_6$ , 298 K, relative to  $\text{CF}_3\text{COOH}$ ,  $\delta/\text{ppm}$ ): -86.08, -87.10, -112.36, -113.04. HRMS (positive ESI) calcd for  $\text{C}_{77}\text{H}_{78}\text{AuF}_4\text{N}_2\text{S}$ :  $m/z = 1335.5482$   $[\text{M}+\text{H}]^+$ ; found 1335.5471  $[\text{M}+\text{H}]^+$ . IR (thin film): 2159  $\text{cm}^{-1}$   $\nu(\text{C}\equiv\text{C})$ . Elemental analysis calculated for  $\text{C}_{77}\text{H}_{77}\text{AuF}_4\text{N}_2\text{S}\cdot\text{H}_2\text{O}$  (%): C, 68.33; H, 5.88; N, 2.07; found: C, 68.39; H, 5.76; N, 2.30.

$[\text{Au}\{3,5\text{-F}_2\text{C}^{\wedge}\text{N}^{\text{THPY}}\text{CF}_2\text{-}3,5\}\{\text{C}\equiv\text{C}-\text{C}_6\text{H}_4-\text{N}[\text{C}_{12}\text{H}_7\text{N}(\text{C}_6\text{H}_{13})]_2\}]$  (**6**). This complex was synthesized by a procedure similar to that of **3**, except that  $[\text{Au}\{3,5\text{-F}_2\text{C}^{\wedge}\text{N}^{\text{THPY}}\text{CF}_2\text{-}3,5\}\text{Cl}]$  (64 mg, 0.11 mmol) was used instead of  $[\text{Au}\{4\text{'BuC}^{\wedge}\text{N}^{\text{THPY}}\text{C'Bu-}4\}\text{Cl}]$ . Subsequent recrystallization by diffusion of diethyl ether vapor into a concentrated THF solution of the product gave **6** as a brown solid. Yield: 70 mg (55 %).  $^1\text{H}$  NMR (500 MHz, THF- $d_8$ , 298 K, relative to  $\text{Me}_4\text{Si}$ ,  $\delta/\text{ppm}$ ):  $\delta$  8.44 (s, 1H, thienopyridyl proton of 3,5- $\text{F}_2\text{C}^{\wedge}\text{N}^{\text{THPY}}\text{CF}_2\text{-}3,5$ ), 8.37–8.36 (d,  $J = 5.4$  Hz, 1H, thienopyridyl proton of 3,5- $\text{F}_2\text{C}^{\wedge}\text{N}^{\text{THPY}}\text{CF}_2\text{-}3,5$ ), 7.98–7.96 (m, 4H, carbazolyl protons), 7.69–7.67 (d,  $J = 5.4$  Hz, 1H, thienopyridyl proton of 3,5- $\text{F}_2\text{C}^{\wedge}\text{N}^{\text{THPY}}\text{CF}_2\text{-}3,5$ ), 7.66–7.64 (dd,  $J = 9.5$  and 2.2 Hz, 1H, phenyl proton of 3,5- $\text{F}_2\text{C}^{\wedge}\text{N}^{\text{THPY}}\text{CF}_2\text{-}3,5$ ), 7.51–7.49 (dd,  $J = 9.5$  and 2.2 Hz, 1H, phenyl proton of 3,5- $\text{F}_2\text{C}^{\wedge}\text{N}^{\text{THPY}}\text{CF}_2\text{-}3,5$ ), 7.47–7.44 (m, 4H, carbazolyl protons), 7.38–7.33 (m, 4H, carbazolyl protons), 7.26–7.25 (d,  $J = 8.7$  Hz, 2H, phenyl protons of  $-\text{C}\equiv\text{C}-\text{C}_6\text{H}_4-$ ), 7.08–7.05 (t,  $J = 7.2$  Hz, 2H, carbazolyl protons), 7.03–7.00 (m, 1H, phenyl proton of 3,5- $\text{F}_2\text{C}^{\wedge}\text{N}^{\text{THPY}}\text{CF}_2\text{-}3,5$ ), 6.92–6.90 (d,  $J = 8.7$  Hz, 2H, phenyl protons of  $-\text{C}\equiv\text{C}-\text{C}_6\text{H}_4-$ ), 6.87–6.83 (m, 1H, phenyl proton of 3,5- $\text{F}_2\text{C}^{\wedge}\text{N}^{\text{THPY}}\text{CF}_2\text{-}3,5$ ), 4.38–4.36 (t,  $J = 6.9$  Hz, 4H,  $-\text{NCH}_2-$ ), 1.90–1.87 (m, 4H,  $-\text{CH}_2-$ ), 1.47–1.44 (m, 4H,  $-\text{CH}_2-$ ), 1.35–1.33 (m, 8H,  $-\text{CH}_2-$ ), 0.90–0.87 (d,  $J = 7.1$  Hz, 6H,  $-\text{CH}_3$ ). No  $^{13}\text{C}\{^1\text{H}\}$  NMR signals were recorded due to the low solubility of the complex.  $^{19}\text{F}\{^1\text{H}\}$  NMR (376 MHz, THF- $d_8$ , 298 K, relative to

CF<sub>3</sub>COOH,  $\delta$ /ppm): -85.00, -86.69, -112.66, -113.27. HRMS (positive ESI) calcd for C<sub>63</sub>H<sub>51</sub>AuF<sub>4</sub>N<sub>4</sub>S:  $m/z$  = 1168.3431 [M]<sup>+</sup>; found 1168.3540 [M]<sup>+</sup>. IR (thin film): 2164 cm<sup>-1</sup>  $\nu$ (C $\equiv$ C). Elemental analysis calculated for C<sub>63</sub>H<sub>51</sub>AuF<sub>4</sub>N<sub>4</sub>S (%): C, 64.72; H, 4.40; N, 4.79; found: C, 64.42; H, 4.63; N, 4.71.

**Computational Details.** All calculations were carried out with the Gaussian 09 suite of programs.<sup>8</sup> By density functional theory (DFT), the ground-state ( $S_0$ ) geometries of complexes **1**, **3**, **5** and **6** were fully optimized in toluene with the hybrid Perdew, Burke, and Ernzerhof (PBE0) functional,<sup>9–11</sup> in conjunction with the conductor-like polarizable continuum model (CPCM).<sup>12,13</sup> Time-dependent density functional theory<sup>14–16</sup> (TDDFT) calculations at the same level associated with CPCM were then carried out on the optimized  $S_0$  geometries to compute the singlet-singlet transitions in the electronic absorption spectra of **1**, **3**, **5** and **6**. In order to investigate the nature of the emissive states, the geometries of the lowest-lying triplet excited states ( $T_1$ ) were optimized with the unrestricted UPBE0/CPCM method for **1**, **3**, **5** and **6**. On the basis of the optimized  $S_0$  and  $T_1$  geometries, vibrational frequencies were calculated and all stationary points were verified to be minima on the potential energy surface, as there are no imaginary frequencies observed (NIMAG = 0). In order to gain further insights into the excited states involved in the thermally activated delayed fluorescence (TADF) and to compute the  $\Delta E_{ST}$  value, the geometries of the  $S_0$ , the lowest singlet excited state ( $S_1$ ) and the  $T_1$  states of **3**, **5** and **6** were optimized using TDDFT with the M06 functional.<sup>17,18</sup> The Cartesian coordinates of the optimized  $S_0$ ,  $S_1$  and  $T_1$  geometries of **1**, **3**, **5** and **6** are given in **Tables S12–S20**. For all the calculations, the Stuttgart effective core potentials (ECPs) and the associated basis set were used to describe Au<sup>19</sup> with f-type polarization functions ( $\zeta = 1.050$ ),<sup>20</sup> while the 6-31G(d,p) basis set<sup>21–23</sup> was applied for all other atoms. All the DFT and TDDFT calculations were carried out with a pruned (99,590) grid for numerical integration.

**OLED fabrication and measurements.** Solution-processed OLEDs were fabricated on patterned indium tin oxide (ITO)-coated glass substrates. The substrates were cleaned with Decon 90, rinsed with deionized water, then dried in an oven, and finally treated in an ultraviolet ozone chamber. A 40-nm-thick poly(ethylenedioxythiophene):poly(styrene sulfonic acid (PEDOT:PSS) was spin-coated onto the ITO-coated glass substrates as hole-transporting layer. After that, the emissive layer was formed by mixing the corresponding gold(III) complex with mCP to prepare a  $10 \text{ mg cm}^{-3}$  solutions in chloroform and spin-coating onto PEDOT:PSS layer to give 30-nm-thick uniform thin film. Onto this, a 5-nm-thick tris(2,4,6-trimethyl-3-(pyridin-3-yl)phenyl)borane (3TPYMB) and a 40-nm-thick 1,3,5-tri[(3-pyridyl)phen-3-yl]benzene (TmPyPB) were evaporated as a hole-blocking layer and an electron-transporting layer, respectively; while a LiF/Al was used as the metal cathode. All the films were sequentially deposited at a rate of  $0.1\text{--}0.2 \text{ nm s}^{-1}$  without vacuum break. A shadow mask was used to define the cathode and to make four  $0.1 \text{ cm}^2$  devices on each substrate. Current density–voltage–luminance characteristics and EL spectra were measured simultaneously with a programmable Keithley model 2420 power source and a Photoresearch PR-655 spectrometer under ambient conditions.

# <sup>1</sup>H and <sup>13</sup>C{<sup>1</sup>H} NMR spectra of the cyclometalating ligands and the gold(III) complexes.

## 4'-BuC<sup>^</sup>N<sup>THPY</sup>C<sup>^</sup>Bu-4

- \* residual CH<sub>2</sub>Cl<sub>2</sub>
- △ residual H<sub>2</sub>O
- ◇ residual C<sub>6</sub>H<sub>14</sub>
- residual Et<sub>2</sub>O
- residual (CH<sub>2</sub>)<sub>4</sub>O

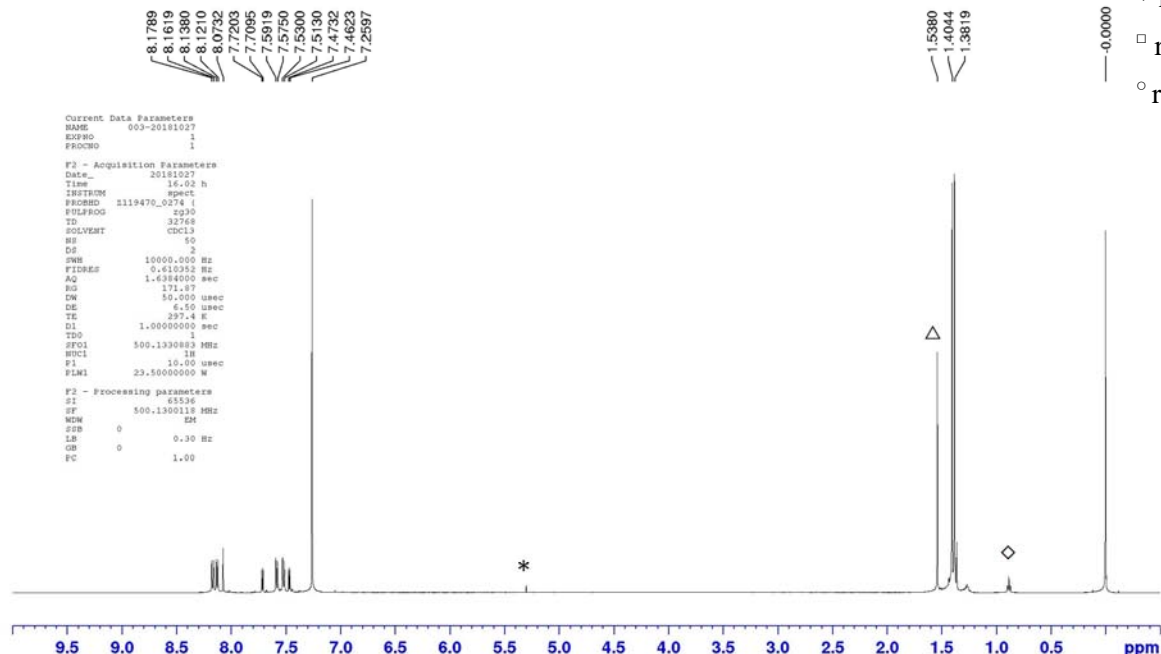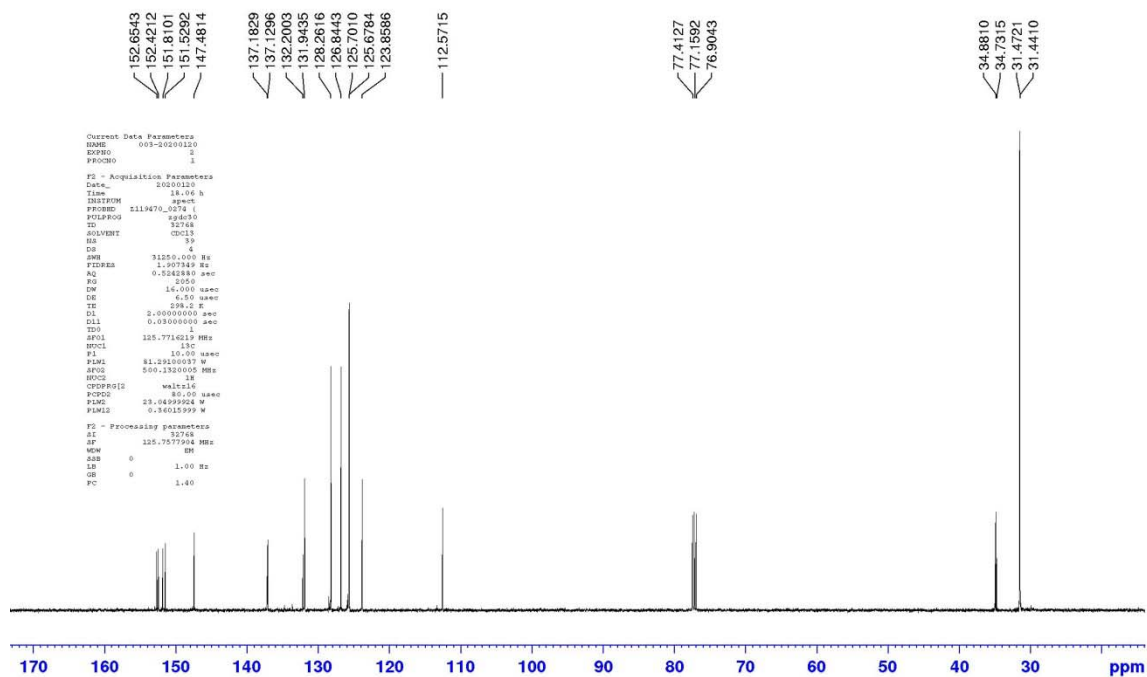

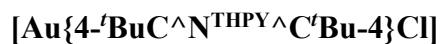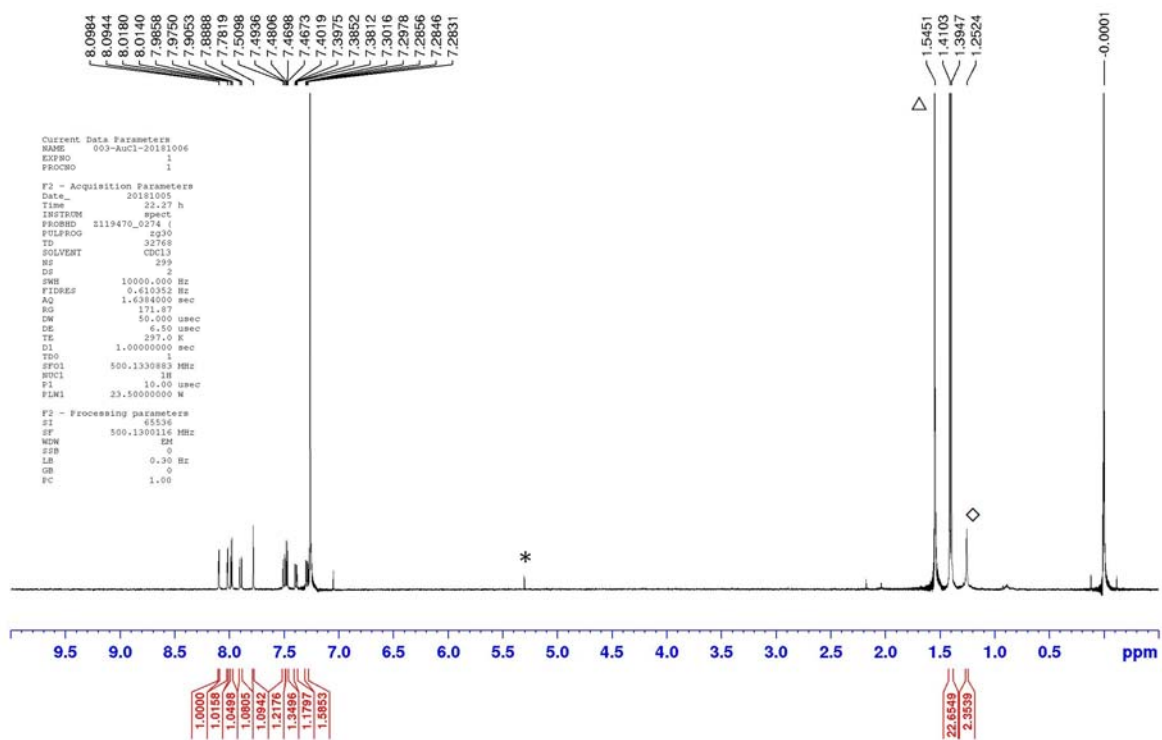



3,5-F<sub>2</sub>C<sup>N</sup>THPY<sup>CF</sup><sub>2</sub>-3,5

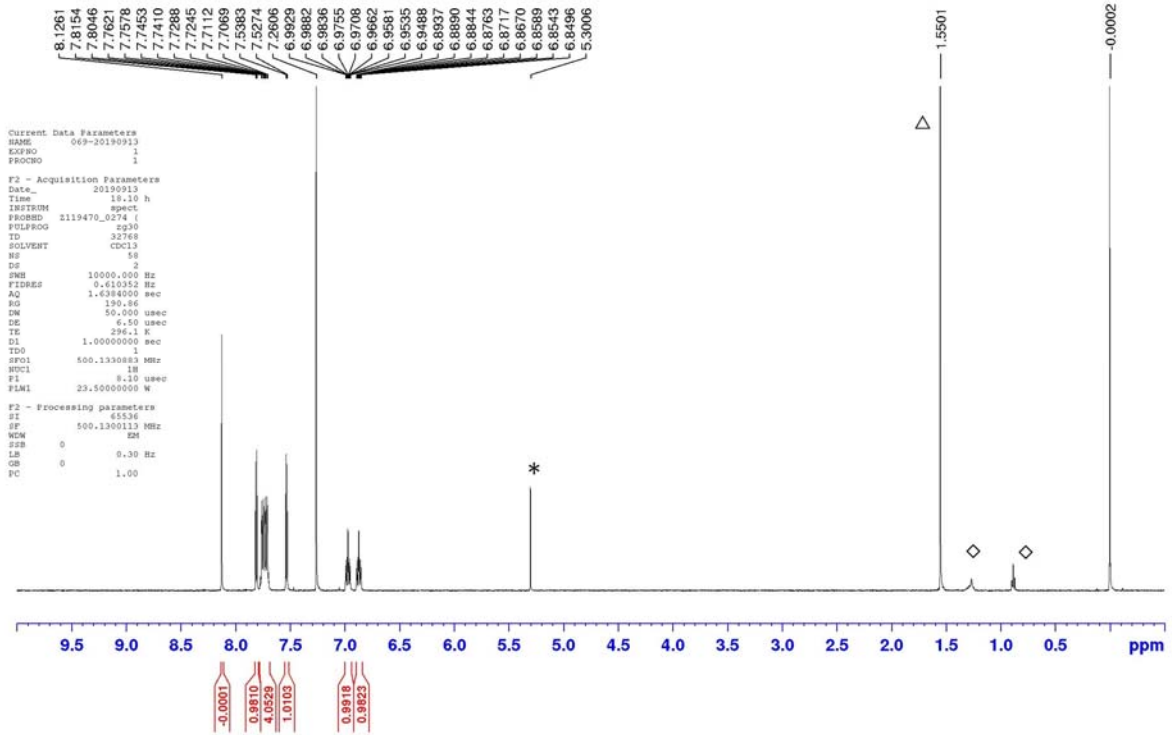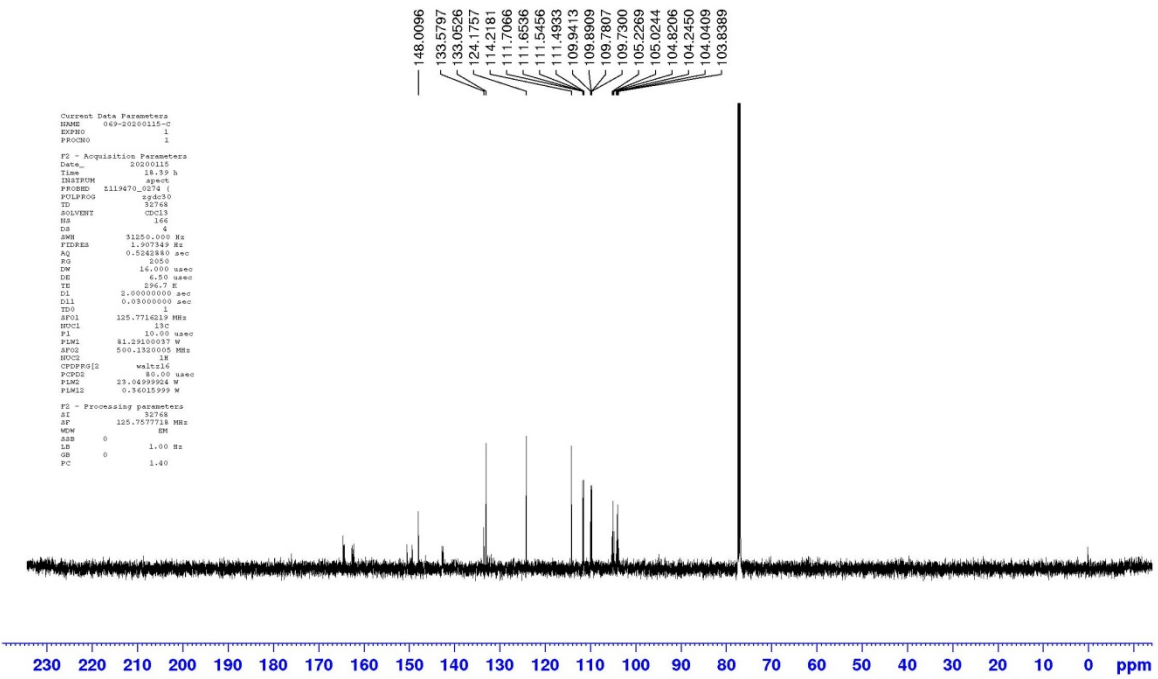

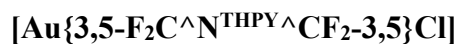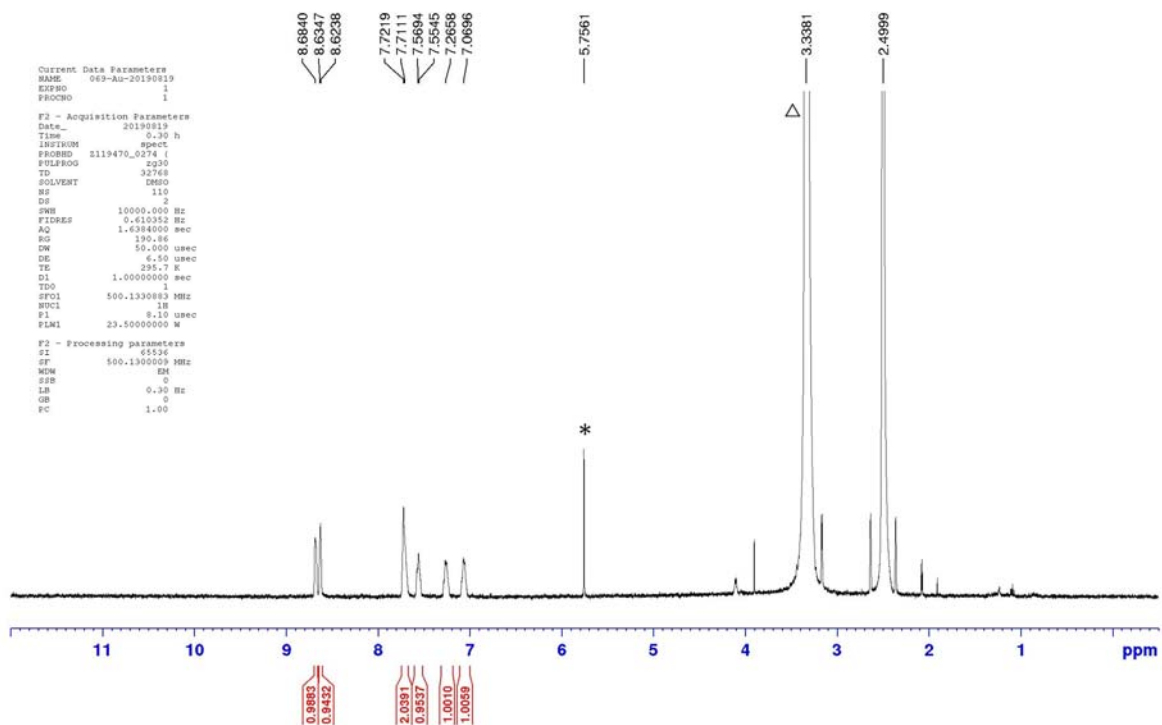

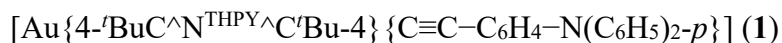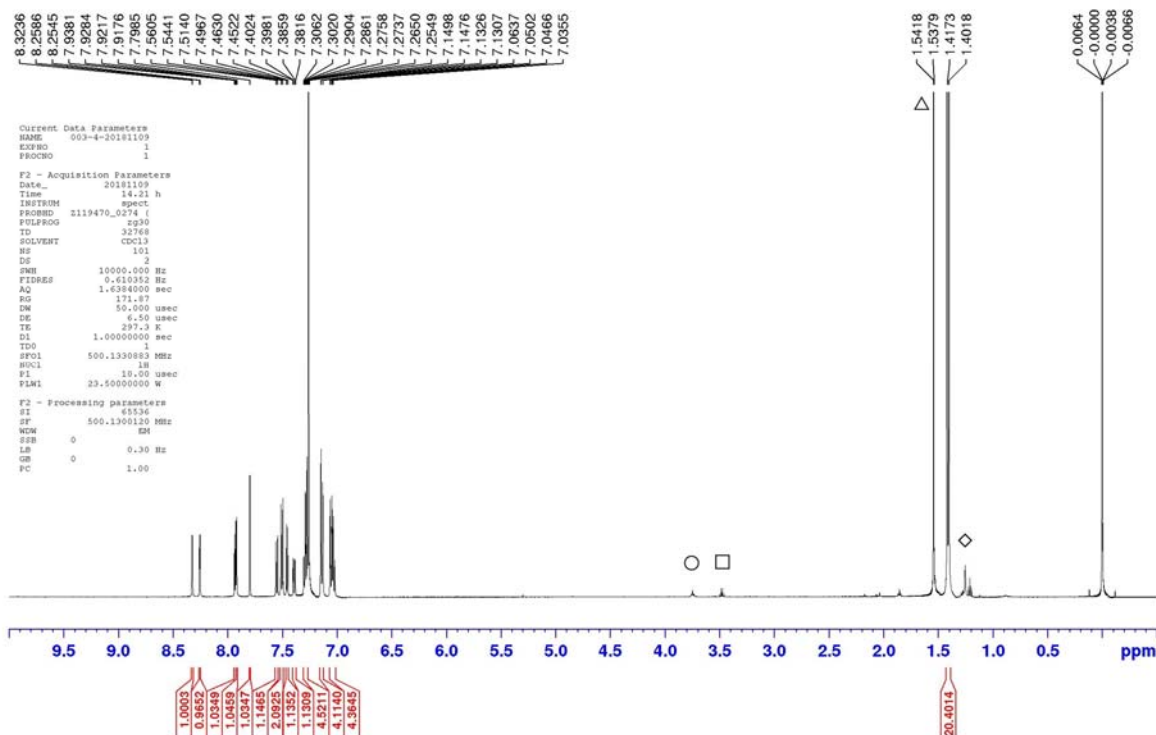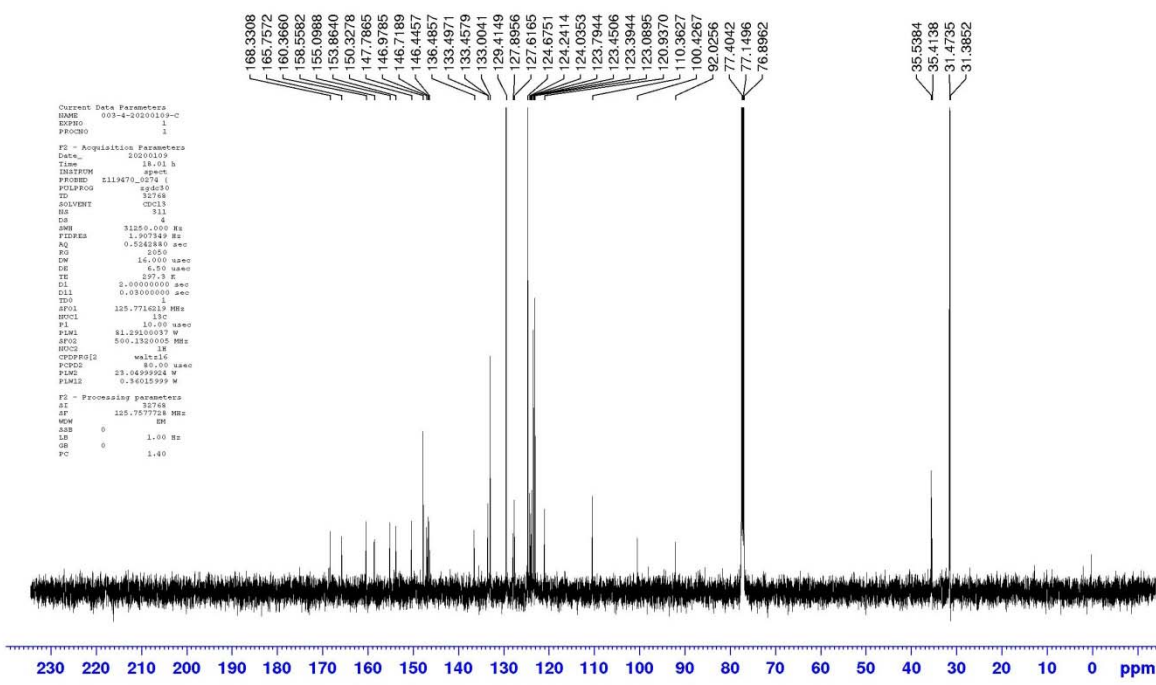

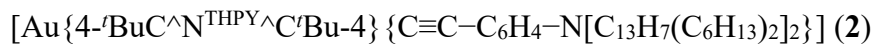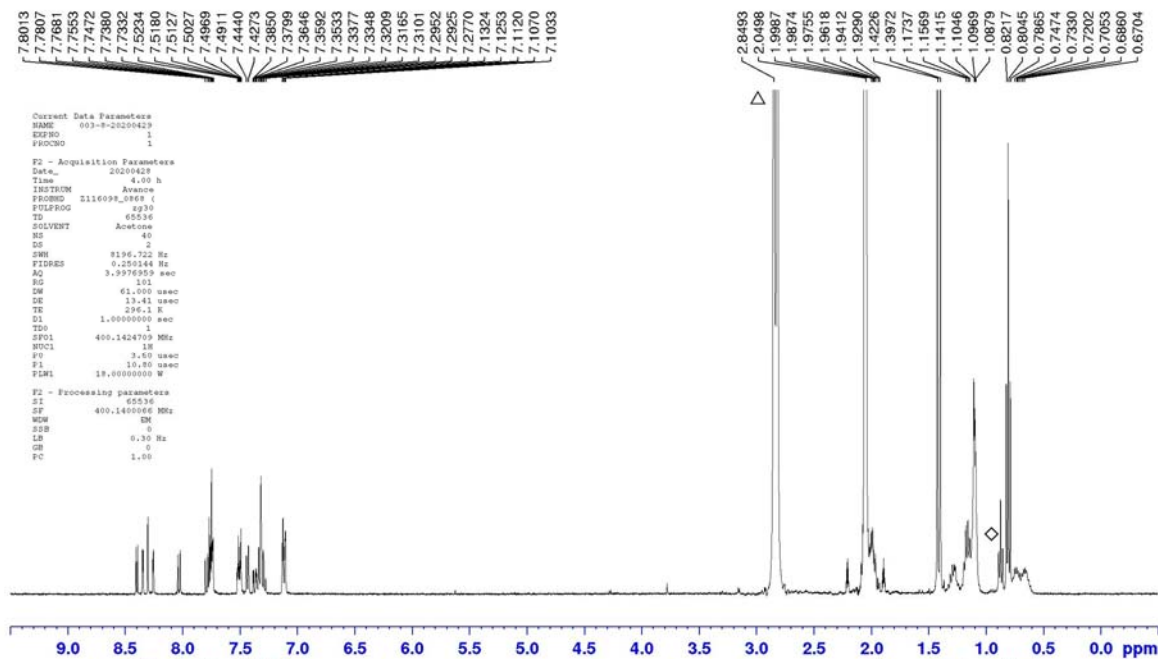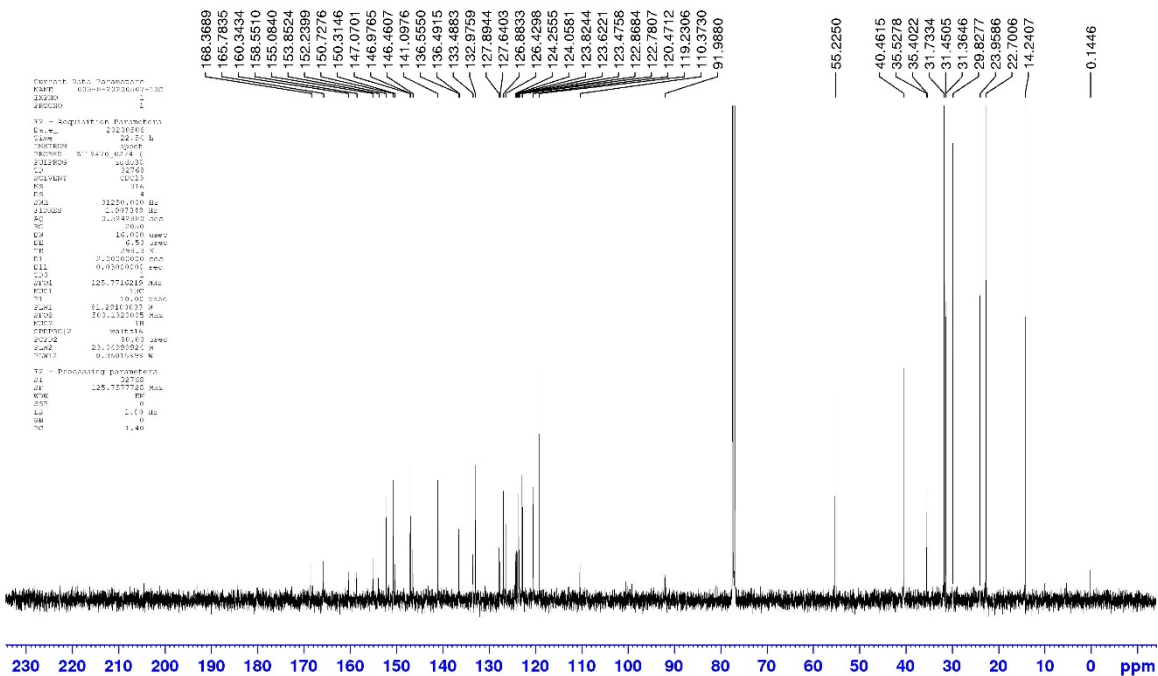

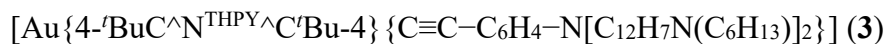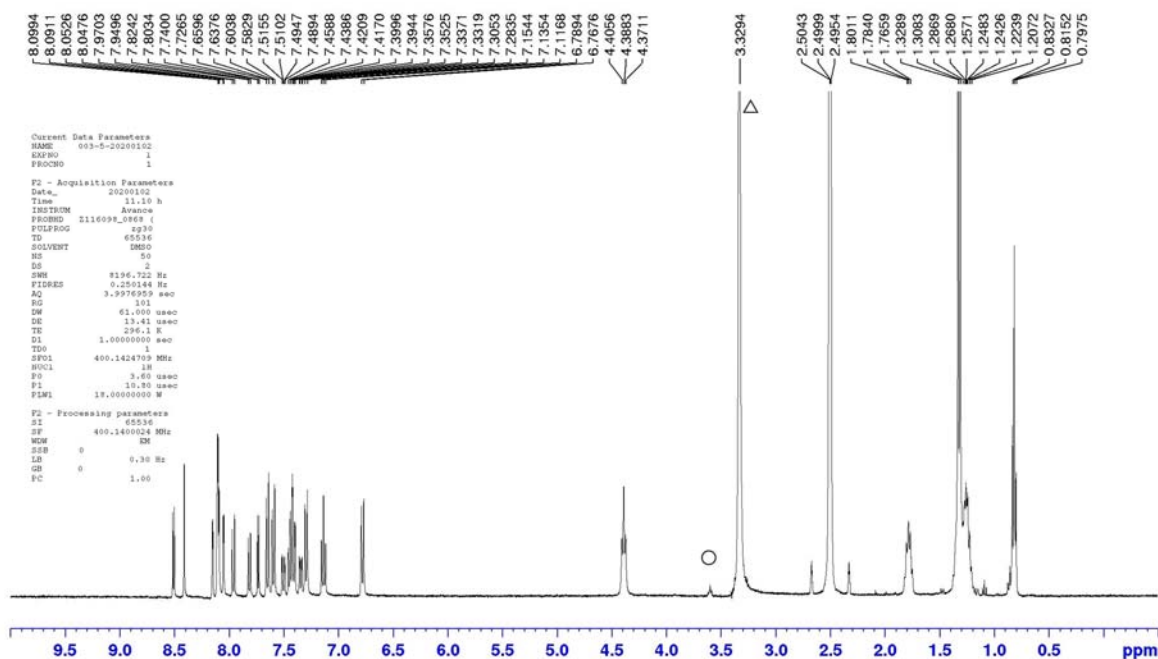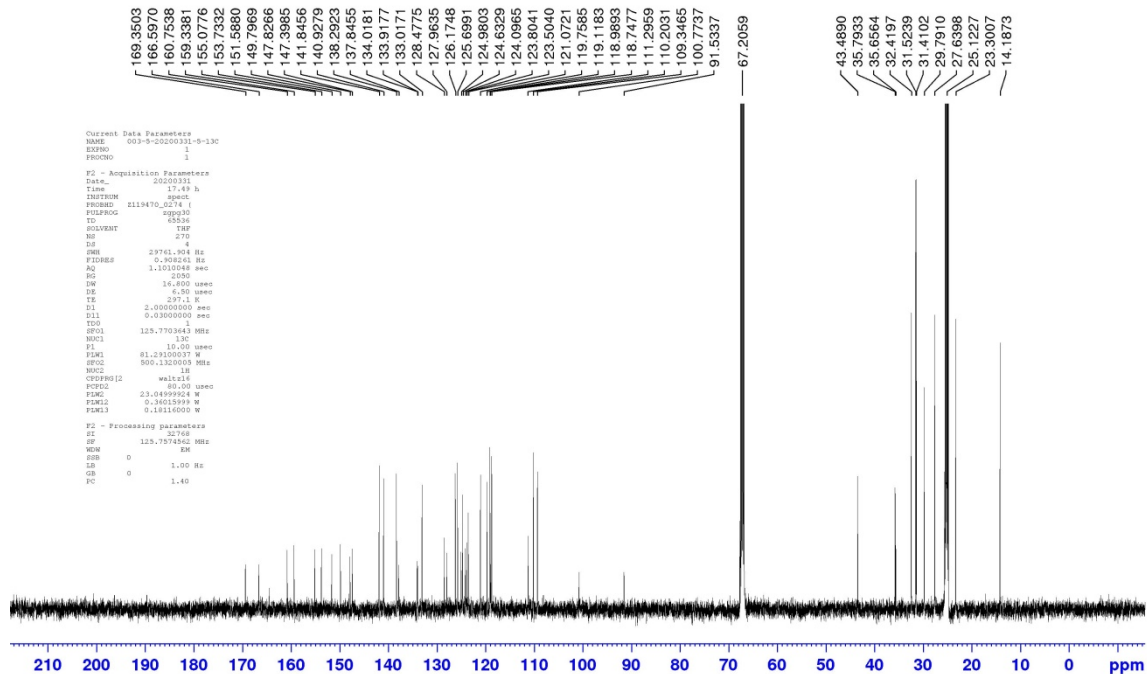

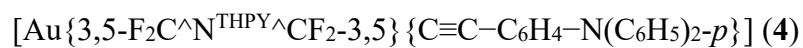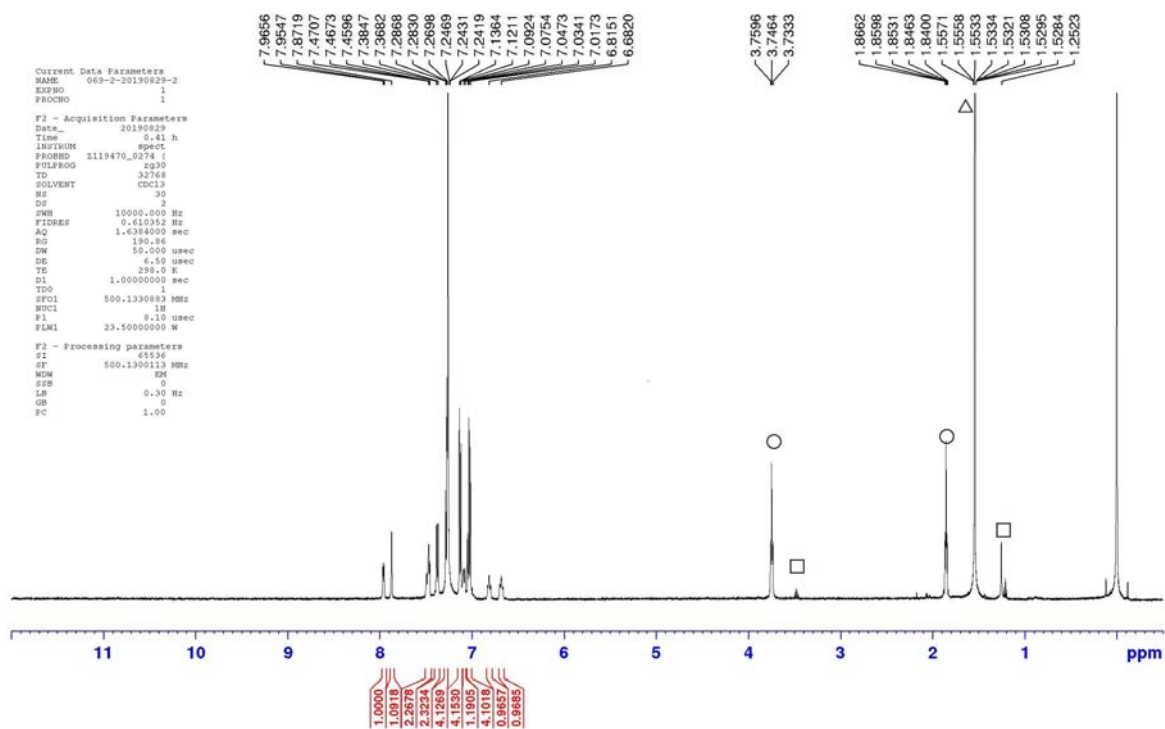

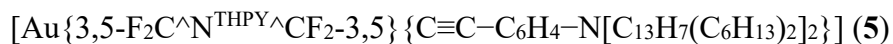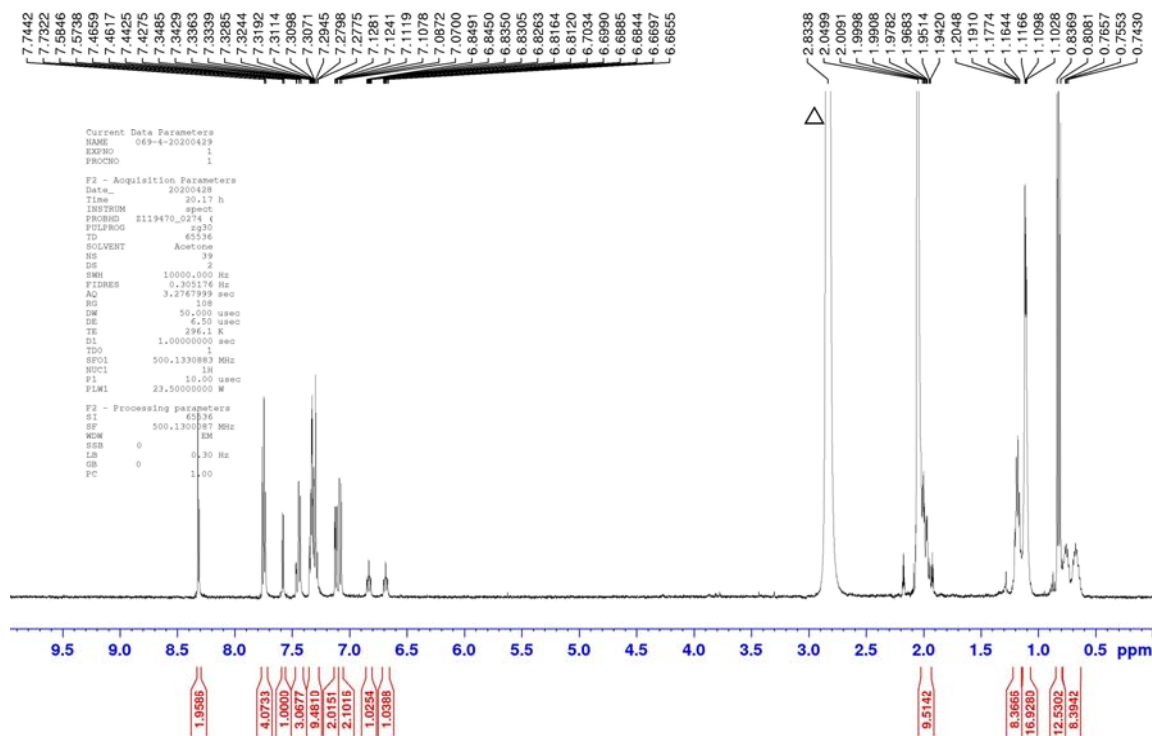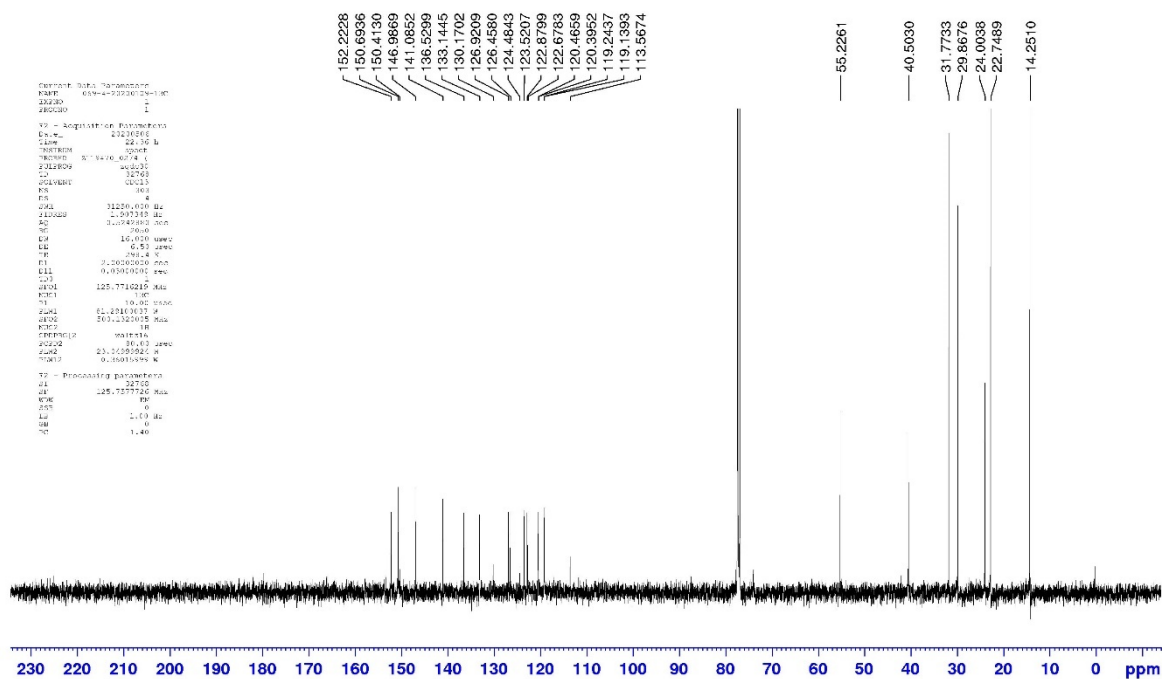

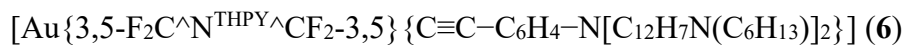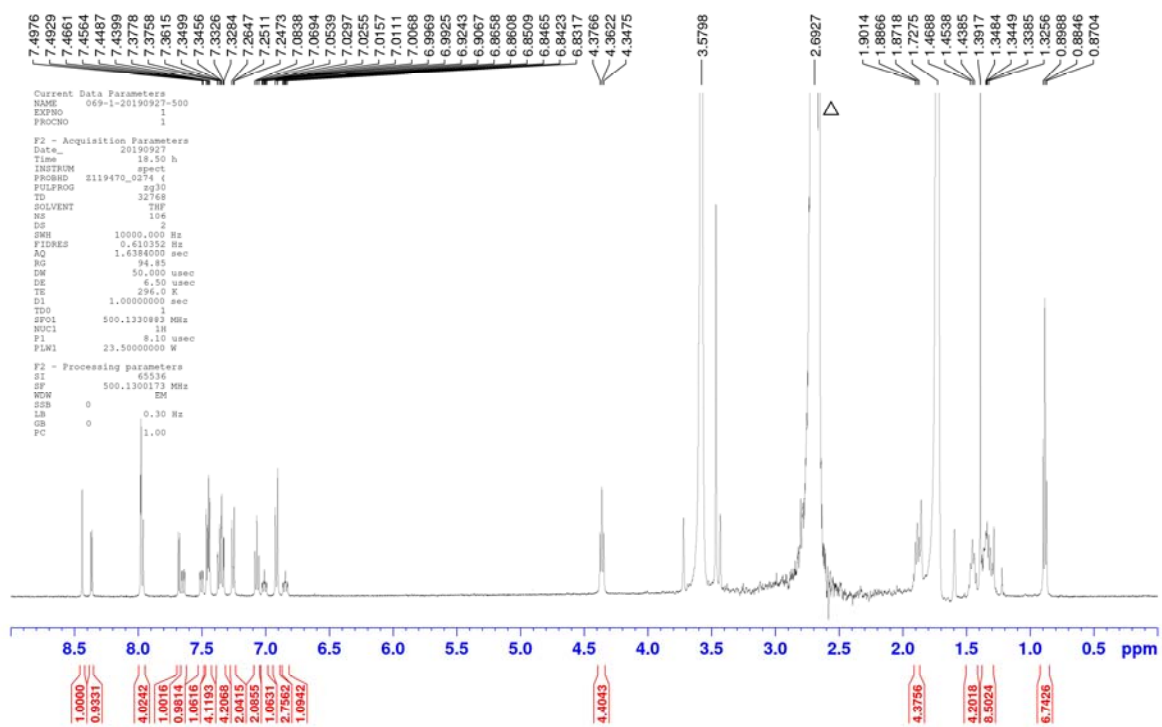



## References

1. N. G. Connelly and W. E. Geiger, *Chem. Rev.*, 1996, **96**, 877–910.
2. G. A. Crosby and J. N. Demas, *J. Phys. Chem.*, 1971, **75**, 991–1024.
3. V. K.-M. Au, K. M.-C. Wong, D. P.-K. Tsang, M.-Y. Chan, N. Zhu and V. W.-W. Yam, *J. Am. Chem. Soc.*, 2010, **132**, 14273–14278.
4. M.-C. Tang, C.-H. Lee, M. Ng, Y.-C. Wong, M.-Y. Chan and V. W.-W. Yam, *Angew. Chem. Int. Ed.*, 2018, **57**, 5463–5466.
5. L.-K. Li, M.-C. Tang, W.-L. Cheung, S.-L. Lai, M. Ng, C. K.-M. Chan, M.-Y. Chan and V. W.-W. Yam, *Chem. Mater.*, 2019, **31**, 6706–6714.
6. C.-H. Lee, M.-C. Tang, W.-L. Cheung, S.-L. Lai, M.-Y. Chan and V. W.-W. Yam, *Chem. Sci.*, 2018, **9**, 6228–6232.
7. M.-C. Tang, L. H.-Y. Lo, W.-L. Cheung, S.-L. Lai, M.-Y. Chan and V. W.-W. Yam, *Chem. Commun.*, 2019, **55**, 13844–13847.
8. M. J. Frisch, G. W. Trucks, H. B. Schlegel, G. E. Scuseria, M. A. Robb, J. R. Cheeseman, G. Scalmani, V. Barone, B. Mennucci, G. A. Petersson, H. Nakatsuji, M. Caricato, X. Li, H. P. Hratchian, A. F. Izmaylov, J. Bloino, G. Zheng, J. L. Sonnenberg, M. Hada, M. Ehara, K. Toyota, R. Fukuda, J. Hasegawa, M. Ishida, T. Nakajima, Y. Honda, O. Kitao, H. Nakai, T. Vreven, J. Montgomery, J. A., J. E. Peralta, F. Ogliaro, M. Bearpark, J. J. Heyd, E. Brothers, K. N. Kudin, V. N. Staroverov, T. Keith, R. Kobayashi, J. Normand, K. Raghavachari, A. Rendell, J. C. Burant, S. S. Iyengar, J. Tomasi, M. Cossi, N. Rega, J. M. Millam, M. Klene, J. E. Knox, J. B. Cross, V. Bakken, C. Adamo, J. Jaramillo, R. Gomperts, R. E. Stratmann, O. Yazyev, A. J. Austin, R. Cammi, C. Pomelli, J. W. Ochterski, R. L. Martin, K. Morokuma, V. G. Zakrzewski, G. A. Voth, P. Salvador, J. J. Dannenberg, S. Dapprich, A. D. Daniels, O. Farkas, J. B. Foresman, J. V. Ortiz, J. Cioslowski and D. J. Fox, Gaussian 09 (Revision D.01). Gaussian, Inc.: Wallingford CT, 2013: 2013.

9. J. P. Perdew, K. Burke and M. Ernzerhof, *Phys. Rev. Lett.*, 1996, **77**, 3865.
10. J. P. Perdew, K. Burke and M. Ernzerhof, *Phys. Rev. Lett.*, 1997, **78**, 1396.
11. C. Adamo and V. Barone, *J. Chem. Phys.*, 1999, **110**, 6158.
12. V. Barone and M. Cossi, *J. Phys. Chem. A*, 1998, **102**, 1995.
13. M. Cossi, N. Rega, G. Scalmani and V. Barone, *J. Comput. Chem.*, 2003, **24**, 669.
14. R. Bauernschmitt and R. Ahlrichs, *J. Chem. Phys.*, 1996, **256**, 454.
15. M. E. Casida, C. Jamorski, K. C. Casida and D. R. Salahub, *J. Chem. Phys.*, 1998, **108**, 4439.
16. R. E. Stratmann, G. E. Scuseria and M. J. Frisch, *J. Chem. Phys.*, 1998, **109**, 8218.
17. Y. Zhao and D. G. Truhlar, *Theor. Chem. Acc.*, 2008, **120**, 215.
18. Y. Zhao and D. G. Truhlar, *Acc. Chem. Res.*, 2008, **41**, 157.
19. D. Andrae, U. Häußermann, M. Dolg, H. Stoll and H. Preuß, *Theor. Chim. Acc.*, 1990, **77**, 123.
20. A. W. Ehlers, M. Böhme, S. Dapprich, A. Gobbi, A. Höllwarth, V. Jonas, K. F. Köhler, R. Stegmann, A. Veldkamp and G. Frenking, *J. Chem. Phys.*, 1993, **208**, 111.
21. W. J. Hehre, R. Ditchfield and J. A. Pople, *J. Chem. Phys.*, 1972, **56**, 2257.
22. P. C. Hariharan and J. A. Pople, *Theor. Chim. Acc.*, 1973, **28**, 213.
23. M. M. Francl, W. J. Pietro, W. J. Hehre, J. S. Binkley, M. S. Gordon, D. J. DeFrees and J. A. Pople, *J. Chem. Phys.*, 1982, **77**, 3654.
