# Supplementary material for: Molecular design of efficient yellow- to red-emissive alkynylgold(iii) complexes for the realization of thermally activated delayed fluorescence (TADF) and their applications in solution-processed organic light-emitting devices
Source: Royal Society of Chemistry journal article supplement (doi:10.1039/d1sc02256c), 2021-01-01
Supplement: d1sc02256c2.pdf [file d1sc02256c2.pdf]

# Molecular Design of Highly Emissive Gold Complexes for OLED Applications

Chemical  
Science

Compounds exhibiting thermally activated delayed fluorescence (TADF) can act as emitters for ultra-high-definition organic light-emitting device (OLED) displays

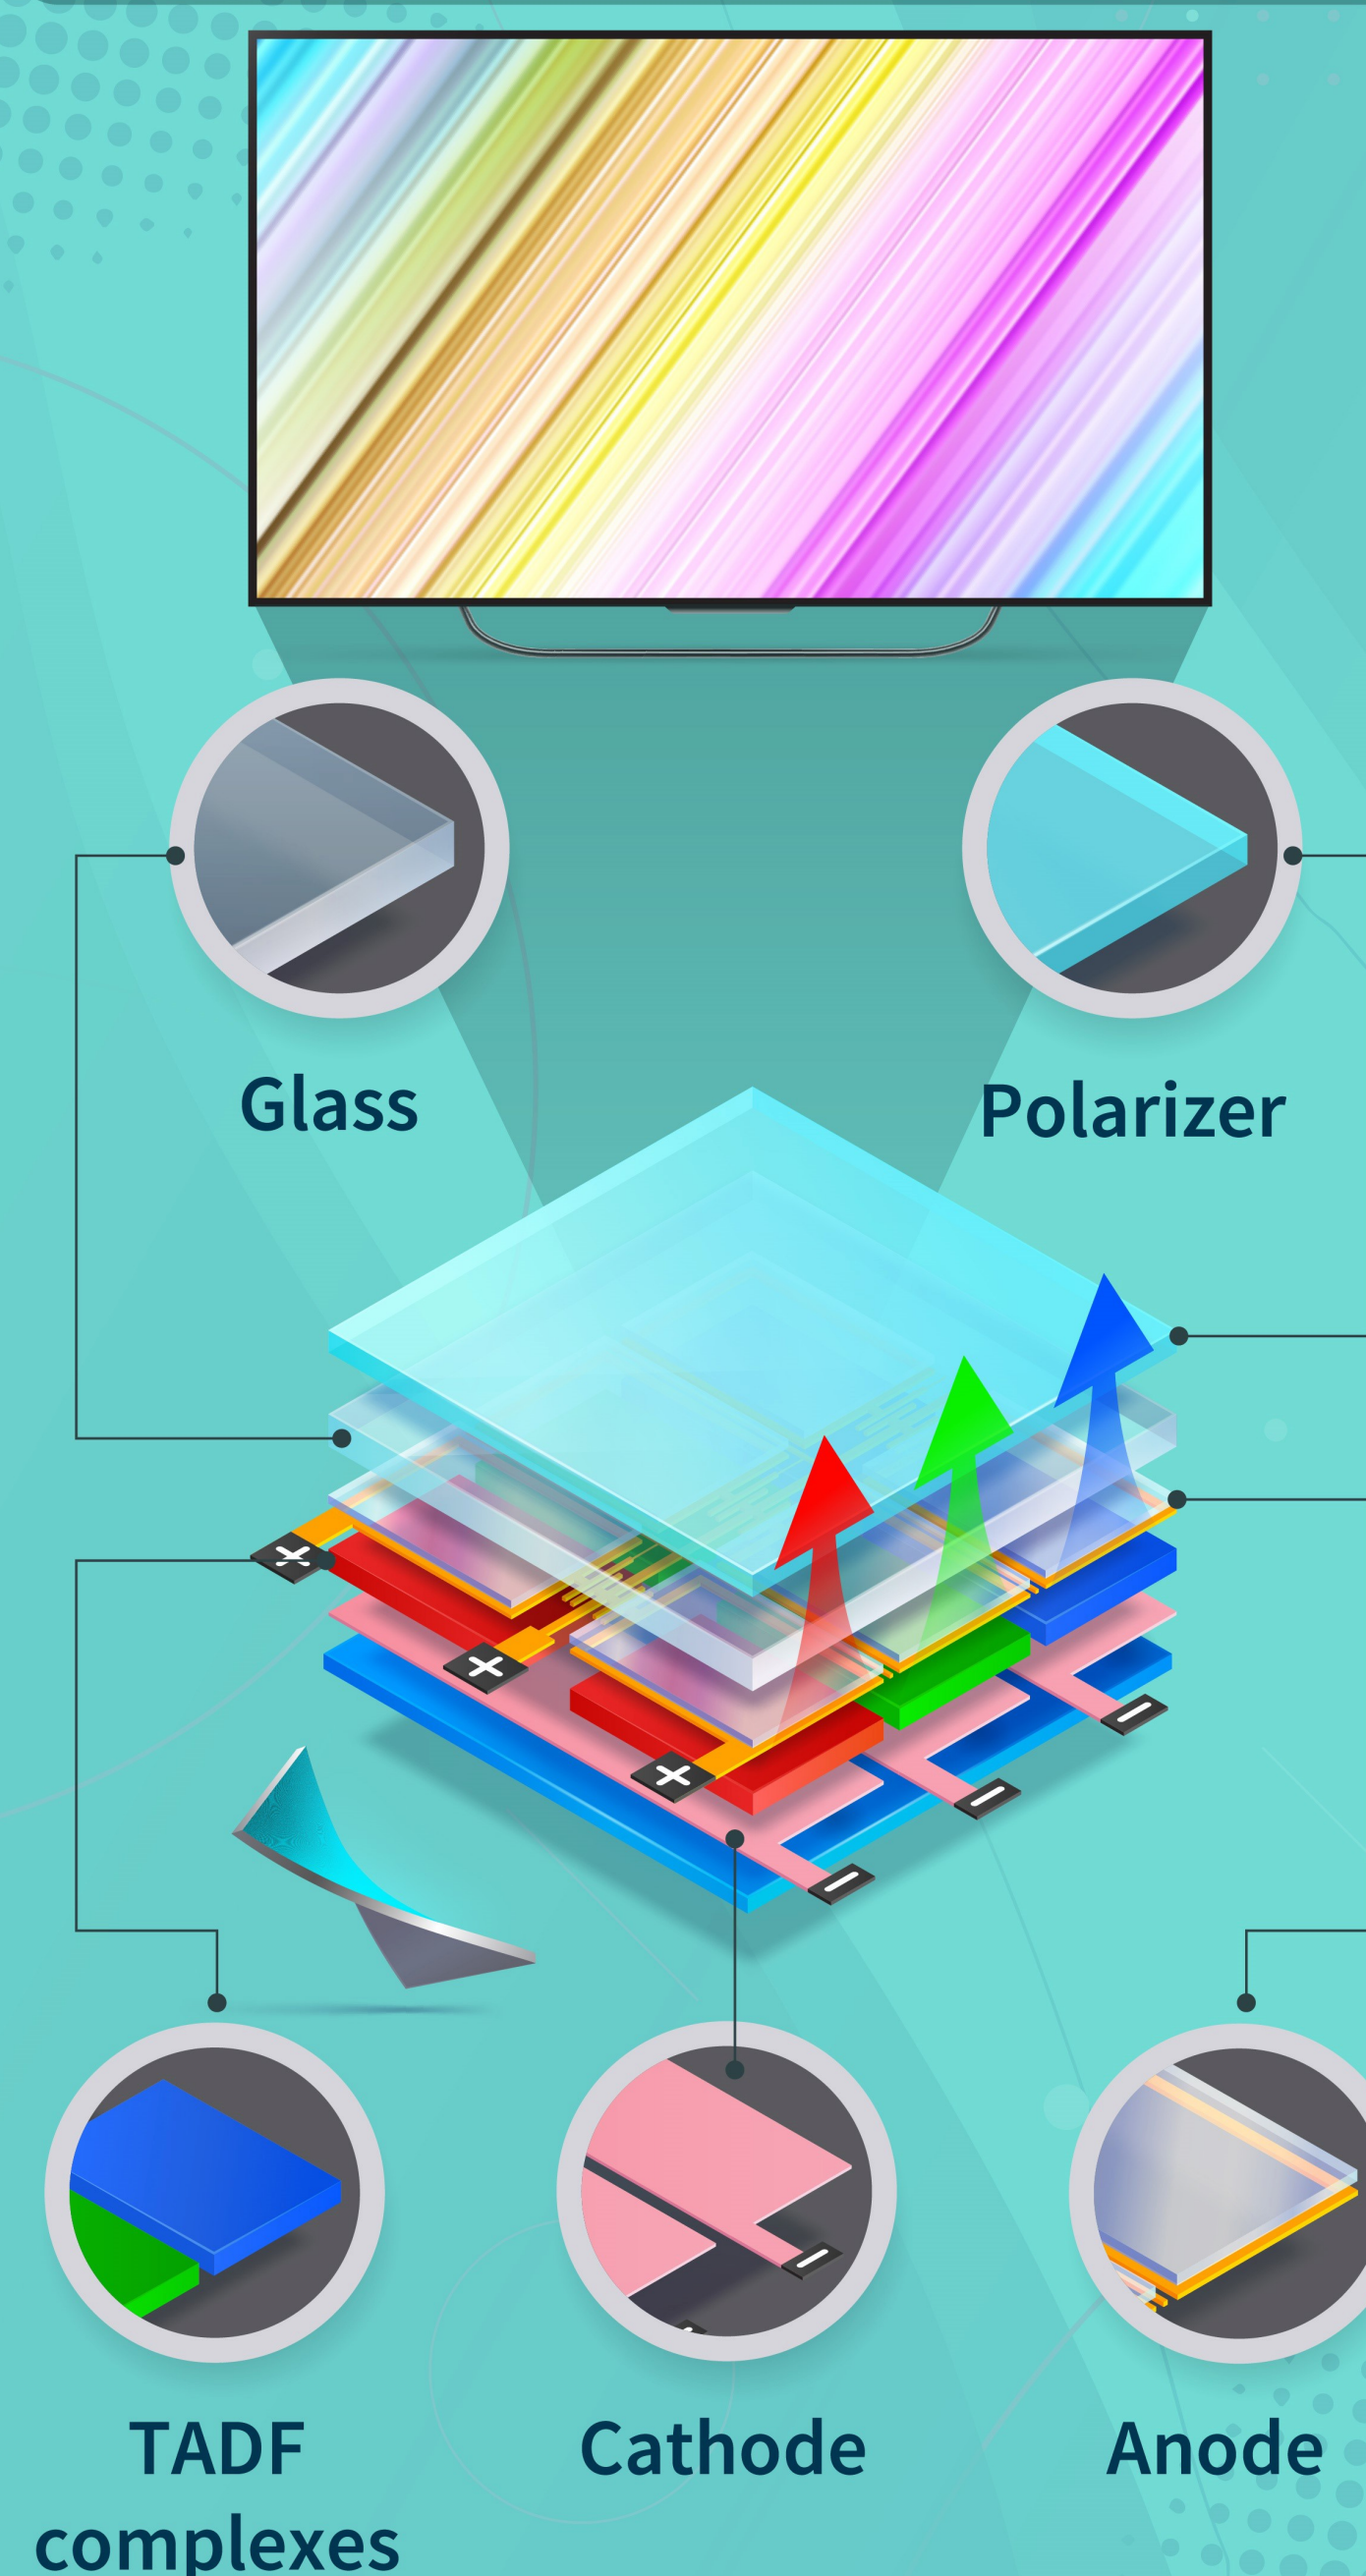

Can highly emissive gold (III) TADF complexes be synthesized?

## Formation of cyclometalated alkynylgold(III) complexes

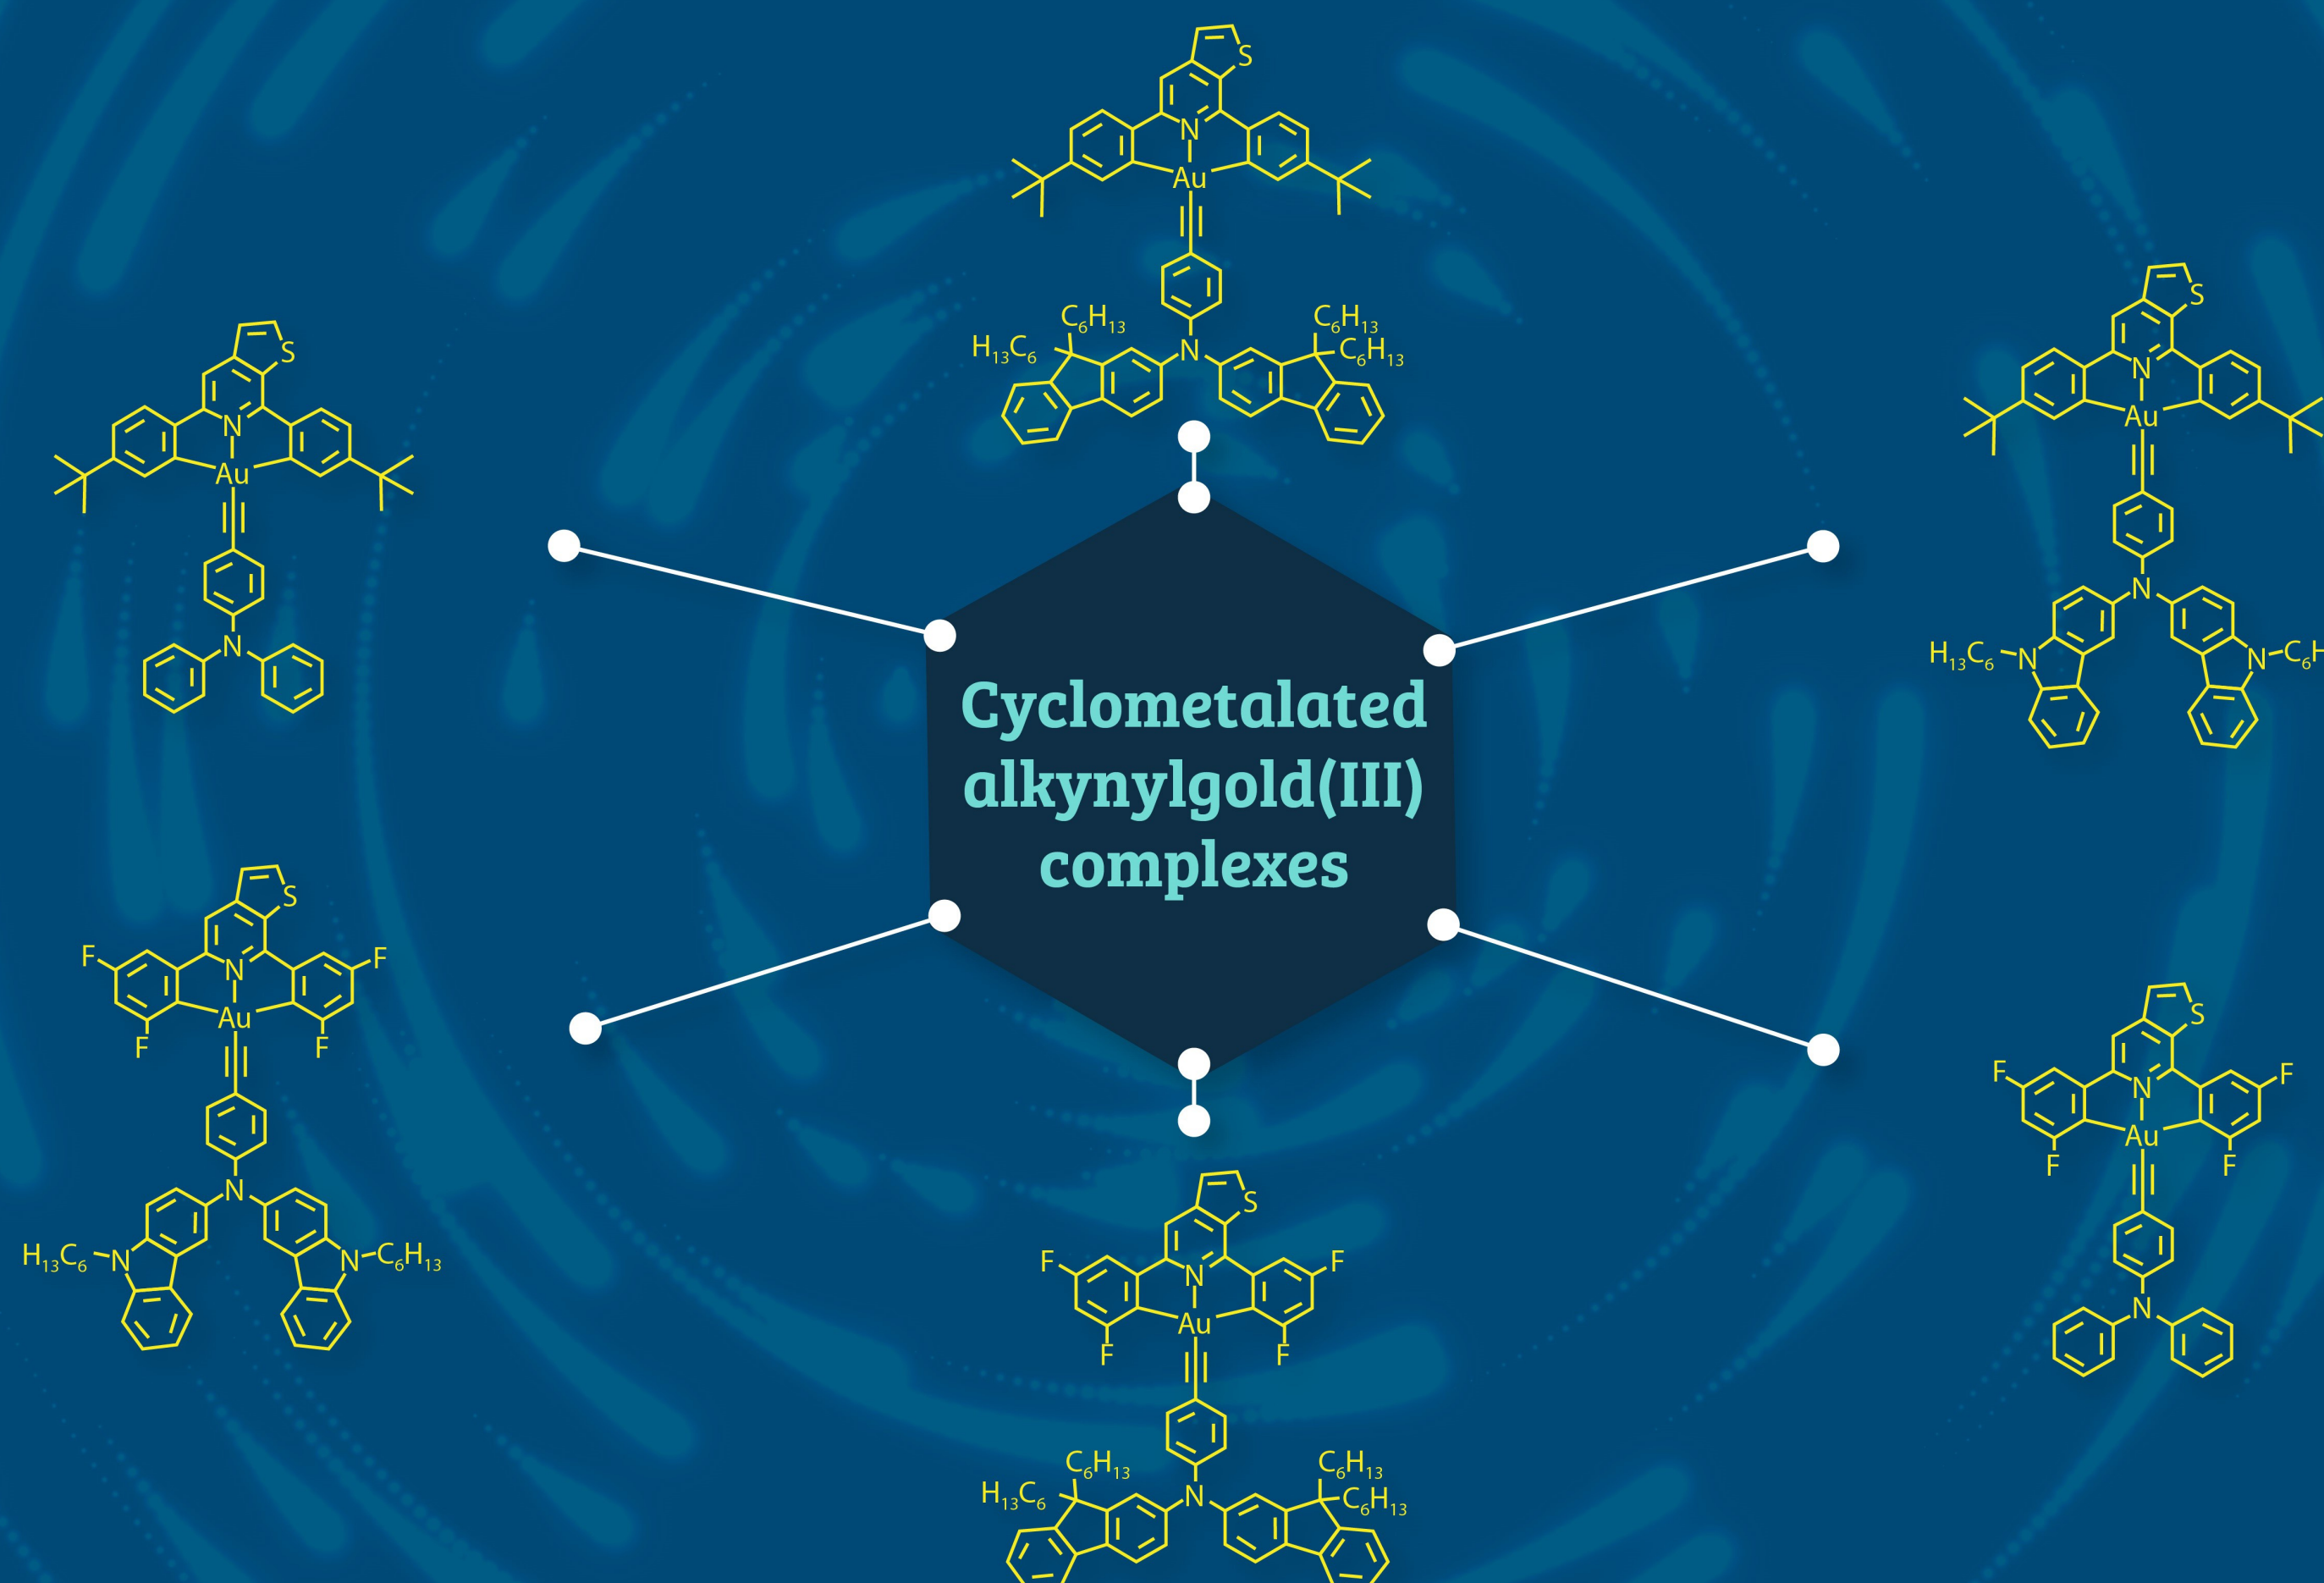

## Choice of cyclometalating ligands and alkynyl ligands control energy gap between HOMO-LUMO

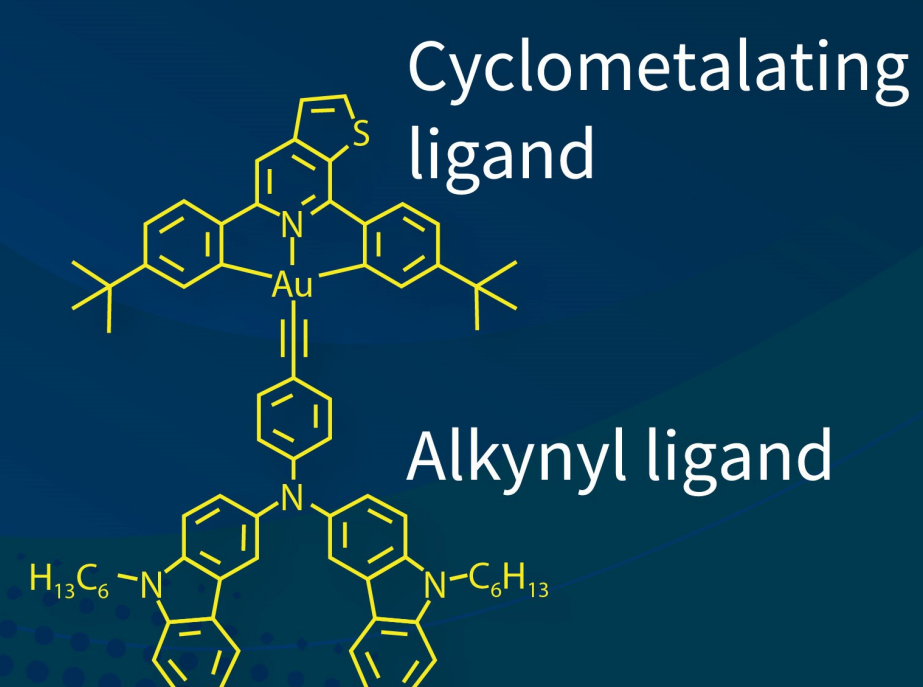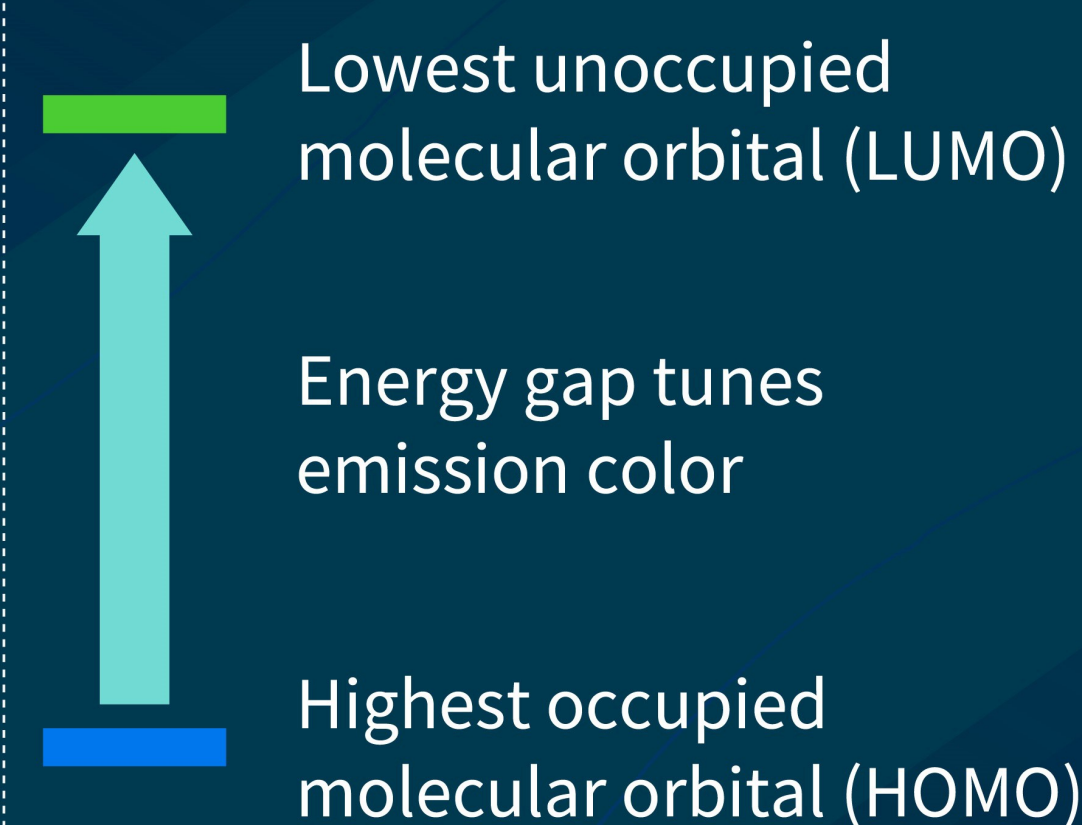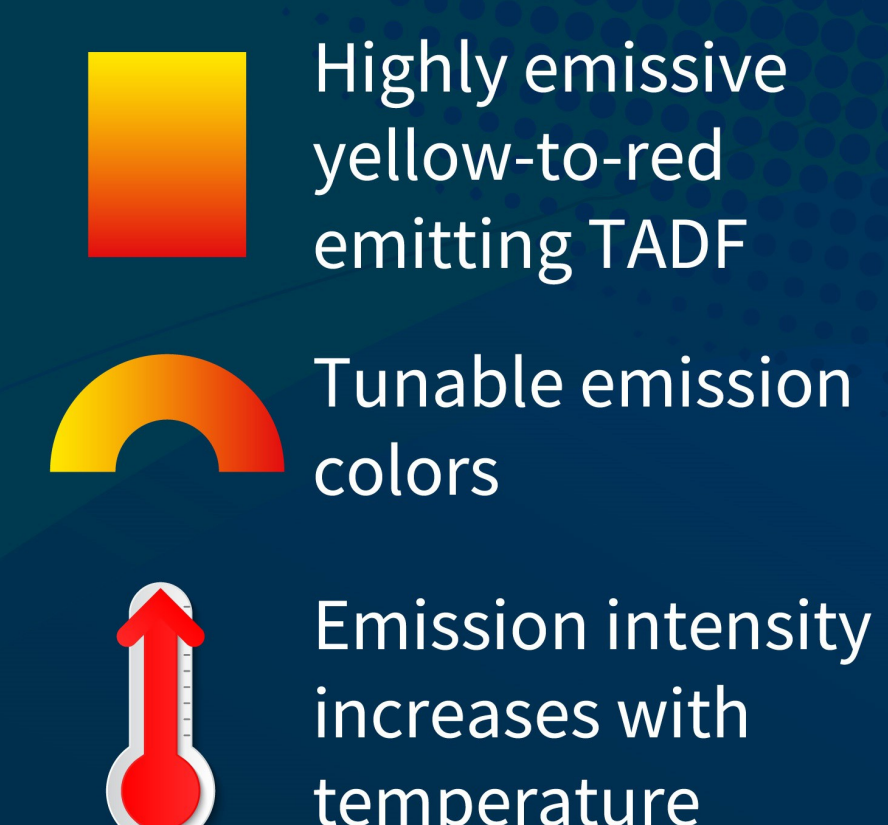

Alkynyl gold complexes are effective TADF emitters suitable for application in OLEDs
